# Supplementary material for: Copper-catalyzed gem-difluoromethylenation of C(sp2)–H bonds of alkenes
Source: Royal Society of Chemistry journal article supplement (doi:10.1039/c7qo00119c), 2017-01-01

# Copper-Catalyzed Difluoromethylenation of C (sp<sup>2</sup>) -H Bonds of Alkenes

Hui Xu <sup>a</sup>, Dejing Wang <sup>a</sup>, Yunrong Chen <sup>a</sup>, Wen Wan <sup>a</sup>, Hongmei Deng <sup>b</sup>, Kesen Ma <sup>c</sup>,  
Shaoxiong Wu <sup>d,\*</sup>, Jian Hao <sup>a\*</sup> and Haizhen Jiang <sup>a,e,\*</sup>

<sup>a</sup> Department of Chemistry, Innovative Drug Research Center, Shanghai University, Shanghai, 200444,  
P. R. China.

E-mail: hzjiang@shu.edu.cn; jhao@shu.edu.cn

<sup>b</sup> Laboratory for Microstructures, Shanghai University, Shanghai, 200444, P. R. China.

<sup>c</sup> Department of Biology, University of Waterloo, 200 University Avenue West, Waterloo, Ontario  
N2L 3G1, Canada.

<sup>d</sup> Emory NMR Research Center, Emory University, 201 Dowman Drive, Atlanta, Georgia, 30322,  
United States.

<sup>e</sup> Key Laboratory of Organofluorine Chemistry, Shanghai Institute of Organic Chemistry, Chinese  
Academy of Sciences, Shanghai, 200032, P. R. China.

## Contents

|                                                                                                                                   |       |
|-----------------------------------------------------------------------------------------------------------------------------------|-------|
| 1. General information.....                                                                                                       | 2     |
| 2. Optimization of the reaction conditions .....                                                                                  | 2-4   |
| 3. Monitored the <i>gem</i> -difluoromethylenation reaction by GC-MS.....                                                         | 4-6   |
| 4. Preliminary mechanistic study.....                                                                                             | 7-12  |
| 5. <sup>1</sup> H NOESY experiments of <b>3j</b> and <b>3t</b> .....                                                              | 13    |
| 6. New compounds characterization.....                                                                                            | 14-23 |
| 7. Copies of <sup>1</sup> H, <sup>19</sup> F and <sup>13</sup> C NMR spectra of product <b>3</b> , <b>4</b> and<br><b>5</b> ..... | 25-71 |

## 1. General information

$^1\text{H}$  NMR and  $^{13}\text{C}$  NMR spectra were recorded on a Bruker AM400 and AM500 spectrometer.  $^{19}\text{F}$  NMR was recorded on a Bruker AM400 spectrometer ( $\text{CFCl}_3$  as an external standard and low field is positive). Chemical shifts ( $\delta$ ) are reported in ppm, and coupling constants (J) are in Hertz (Hz). The following abbreviations were used to explain the multiplicities: s = singlet, d = doublet, t = triplet, q = quartet, m = multiplet, br = broad. NMR yield was determined by  $^{19}\text{F}$  NMR using trifluorotoluene as an internal standard before working up the reaction. Infrared spectra (IR) were recorded on AVATAR 370 FT-IR spectrometer, absorbance frequencies are given at maximum of intensity in  $\text{cm}^{-1}$ . Melting points were obtained on a X-4 digital melting point apparatus without correction. High-resolution mass spectra (HRMS) were measured with JEOL JMX-SX 102A spectrometer (FAB) and electrospray (ESI). Some associative experiments were performed on a Varian Saturn 2200 GC-MS system.

**Materials:** All reagents were used as received from commercial sources.

## 2. Optimization of the reaction conditions

### 2.1 Optimization of reaction time

**Table S1.** Optimization of reaction time

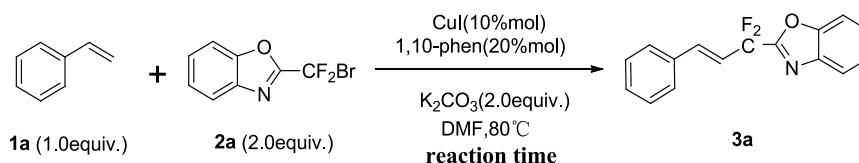

| Entry | Reaction time (h) | <b>3a</b> Yield (%) <sup>a</sup> |
|-------|-------------------|----------------------------------|
| 1     | 8                 | 67                               |
| 2     | 10                | 89                               |
| 3     | 19                | 88                               |
| 4     | 24                | 91                               |

<sup>a</sup> Determined by  $^{19}\text{F}$  NMR spectroscopy using  $\text{PhCF}_3$  as an internal standard

Conclusion: From above, the yield of desired product obviously increased when the reaction time changed from 8 hours to 10 hours. However, the yield was almost constant when the time prolonged from 10 h, 19 h to 24 h. Therefore, the reaction time was selected 10 h.

## 2.2 Optimization of the substrate ratio

**Table S2.** Optimization of the substrate ratio

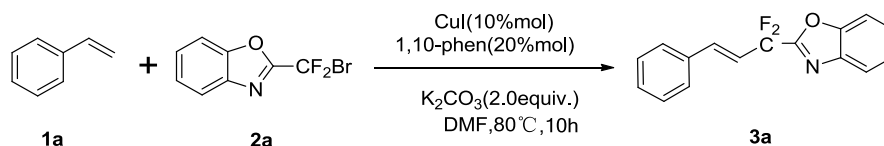

| Entry | 2a (equiv.) | 1a (equiv.) | 3a Yield (%) <sup>a</sup> |
|-------|-------------|-------------|---------------------------|
| 1     | 1.5         | 1.0         | 56                        |
| 2     | 2.0         | 1.0         | 67                        |
| 3     | 3.0         | 1.0         | 90                        |
| 4     | 5.0         | 1.0         | 87                        |

<sup>a</sup> Determined by <sup>19</sup>F NMR spectroscopy using PhCF<sub>3</sub> as an internal standard

Conclusion: From above, the yields of product **3a** have obvious change when the amount of the substrate **2a** increased from 2.0 to 3.0 equiv. Continue to increase the amount of substrate **2a** to 5.0 equiv, the yield was slightly lower. Therefore, the substrate ratio (**2/1a**) = 2:1 was selected in the optimized reaction condition.

## 2.3 Optimization of reaction temperature

**Table S3.** Optimization of reaction temperature

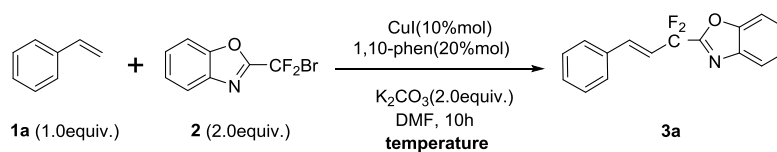

| Entry | temperature (°C) | Yield (%) <sup>a</sup> |
|-------|------------------|------------------------|
| 1     | 60               | 54                     |
| 2     | 80               | 90                     |
| 3     | 100              | 87                     |
| 4     | 120              | 68                     |

<sup>a</sup> Determined by <sup>19</sup>F NMR spectroscopy using PhCF<sub>3</sub> as an internal standard

Conclusion: From above, the lower yield was observed when the reaction was carried at 120°C. Therefore, the 80°C was selected as the best reaction temperature.

## 2.4 Optimization of ratio between catalyst and ligand

**Table S4.** Optimization of ratio between catalyst and ligand

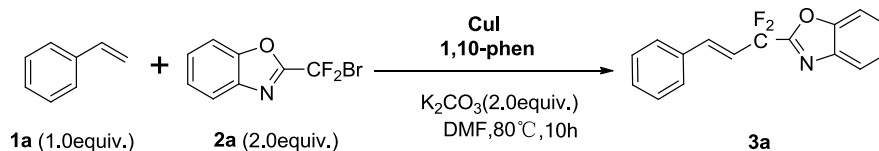

| Entry | CuI (equiv) | 1,10-phen (equiv) | Yield (%) <sup>a</sup> |
|-------|-------------|-------------------|------------------------|
| 1     | 0.005       | 0.012             | 38                     |
| 2     | 0.01        | 0.02              | 88                     |
| 3     | 0.01        | 0.015             | 49                     |
| 4     | 0.01        | 0.01              | 42                     |
| 5     | 0.01        | 0.03              | 90                     |

<sup>a</sup> Determined by <sup>19</sup>F NMR spectroscopy using PhCF<sub>3</sub> as an internal standard  
 Conclusion: From table S4, the combination of 0.01 equiv. CuI and 0.02 equiv. 1,10-phen was selected as the optimized reaction condition.

### 3. Monitored the *gem*-difluoromethylenation reaction by GC-MS

#### 3.1 Exploring the reactions of **11** and **2a** by GC-MS

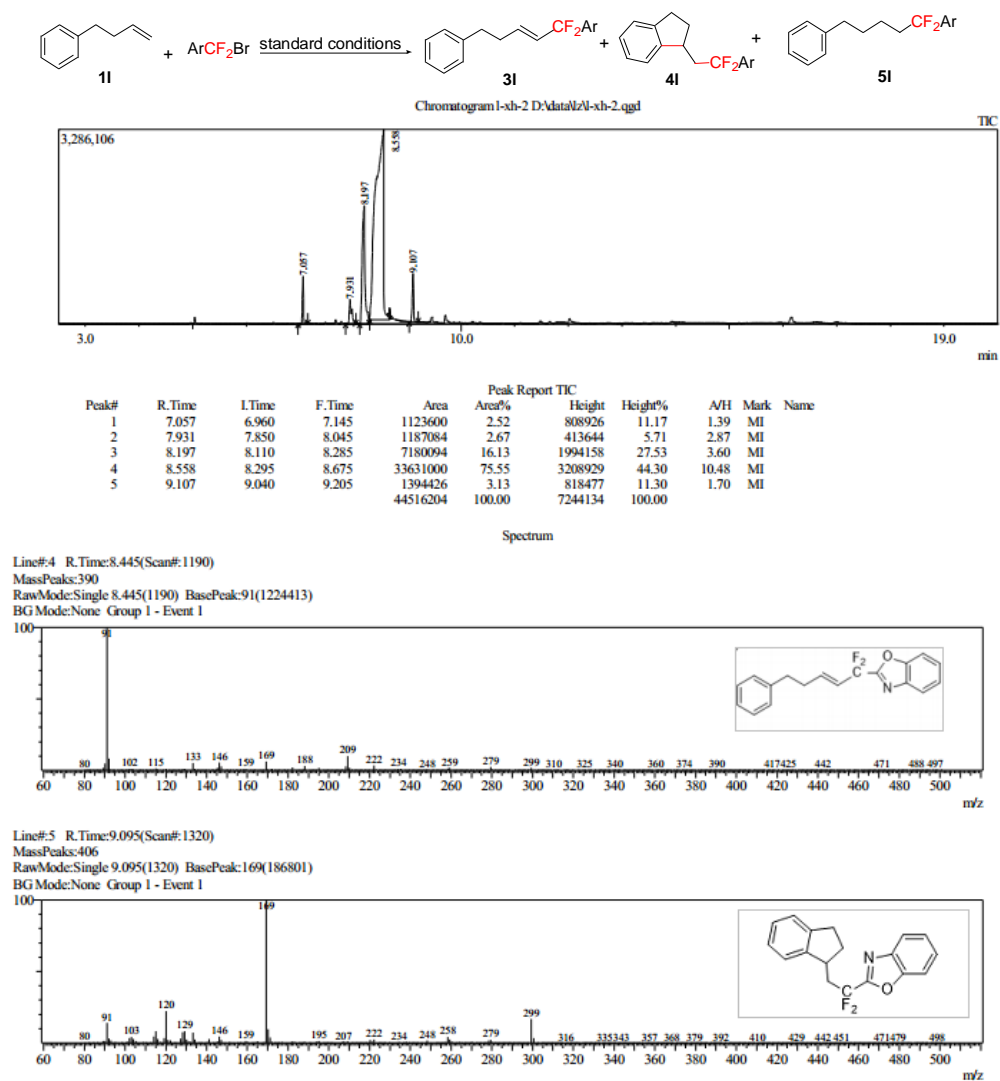

**Scheme S1.** The results of the reaction of **11** and **2a** by GC-MS

Conclusion: From scheme S1, the peak at 8.445 min is attributed to the main product **31**, and the peak at 9.095 min is that of **41**.

### 3.2 Exploring the reaction of **1q** and **2a** by GC-MS

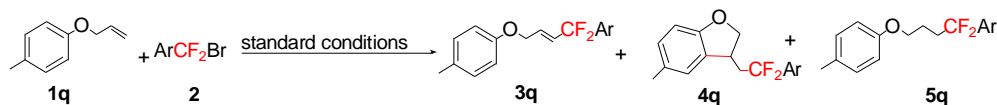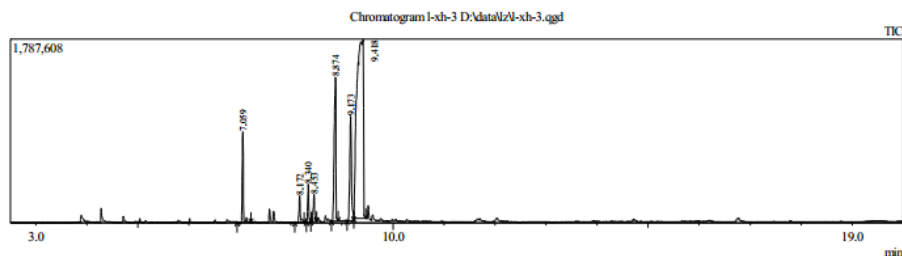

| Peak# | R.Time | L.Time | F.Time | Area     | Area%  | Height  | Height% | A/H  | Mark | Name |
|-------|--------|--------|--------|----------|--------|---------|---------|------|------|------|
| 1     | 7.059  | 6.950  | 7.220  | 1280989  | 5.39   | 882737  | 14.86   | 1.45 | MI   |      |
| 2     | 8.172  | 8.080  | 8.260  | 406274   | 1.71   | 262307  | 4.42    | 1.55 | MI   |      |
| 3     | 8.340  | 8.300  | 8.400  | 540535   | 2.27   | 367370  | 6.18    | 1.47 | MI   |      |
| 4     | 8.453  | 8.390  | 8.505  | 492510   | 2.07   | 268085  | 4.51    | 1.84 | MI   |      |
| 5     | 8.874  | 8.795  | 8.930  | 3152420  | 13.27  | 1399733 | 23.56   | 2.25 | MI   |      |
| 6     | 9.173  | 9.105  | 9.235  | 2337858  | 9.84   | 1016833 | 17.12   | 2.30 | MI   |      |
| 7     | 9.418  | 9.235  | 9.470  | 15550987 | 65.45  | 1743415 | 29.35   | 8.92 | MI   |      |
|       |        |        |        | 23761573 | 100.00 | 5940480 | 100.00  |      |      |      |

Spectrum

Line#2 R.Time:8.185(Scan#:1138)  
MassPeaks:394  
RawMode:Single 8.185(1138) BasePeak:159(7425)  
BG Mode:None Group 1 - Event 1

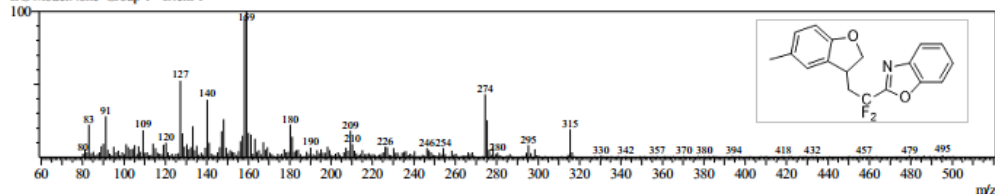

Line#6 R.Time:9.165(Scan#:1334)  
MassPeaks:387  
RawMode:Single 9.165(1334) BasePeak:210(381620)  
BG Mode:None Group 1 - Event 1

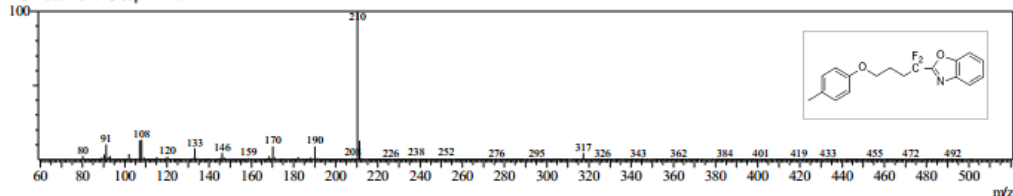

Line#7 R.Time:9.340(Scan#:1369)  
MassPeaks:400  
RawMode:Single 9.340(1369) BasePeak:188(261764)  
BG Mode:None Group 1 - Event 1

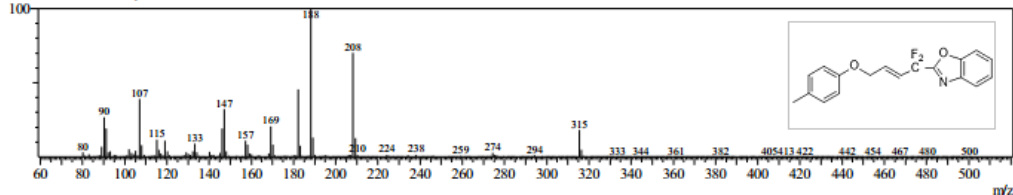

**Scheme S2.** The results of the reaction of **1q** and **2a** by GC-MS

Conclusion: The desired product **3q**, the peak at 9.340 min, was obtained in 35% isolated yield. The product **5q** (GC-MS at 9.165 min) was formed through the active radical abstracting H. The product **4q**, detected by  $^{19}\text{F}$  NMR and GC-MS (8.185 min), was a *gem*-difluoromethylation/cyclizaion cascade product.

### 3.3 Exploring the reaction of **2a** and **1k** by GC-MS

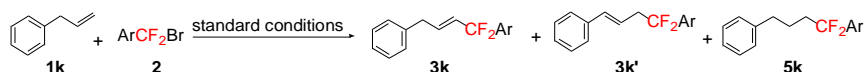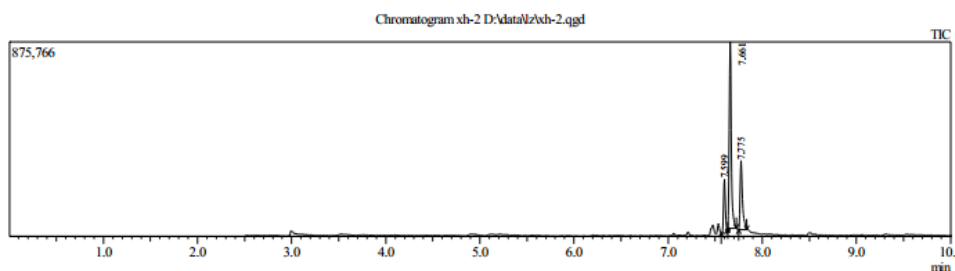

| Peak# | R.Time | L.Time | F.Time | Area    | Area%  | Height  | Height% | A/H  | Mark | Name |
|-------|--------|--------|--------|---------|--------|---------|---------|------|------|------|
| 1     | 7.599  | 7.565  | 7.635  | 331378  | 15.70  | 242985  | 17.42   | 1.36 | MI   |      |
| 2     | 7.661  | 7.635  | 7.725  | 1246693 | 59.06  | 839201  | 60.17   | 1.49 | MI   |      |
| 3     | 7.775  | 7.750  | 7.835  | 532776  | 25.24  | 312438  | 22.40   | 1.71 | MI   |      |
|       |        |        |        | 2110847 | 100.00 | 1394624 | 100.00  |      |      |      |

Spectrum

Line#1 R.Time:7.600(Scan#:1021)

MassPeaks:399

RawMode:Single 7.600(1021) BasePeak:222(42857)

BG Mode:None Group 1 - Event 1

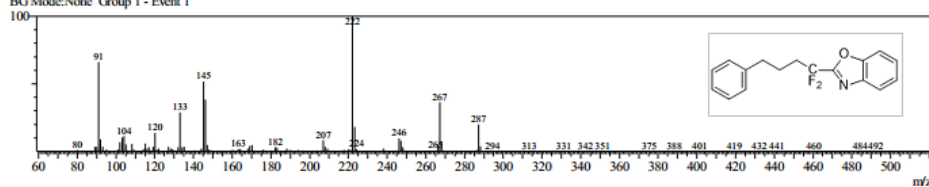

Line#2 R.Time:7.665(Scan#:1034)

MassPeaks:398

RawMode:Single 7.665(1034) BasePeak:194(87254)

BG Mode:None Group 1 - Event 1

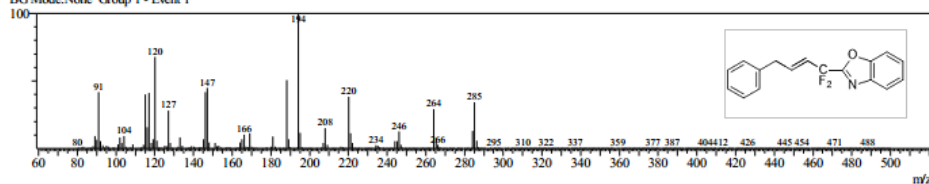

Line#3 R.Time:7.775(Scan#:1056)

MassPeaks:399

RawMode:Single 7.775(1056) BasePeak:188(58601)

BG Mode:None Group 1 - Event 1

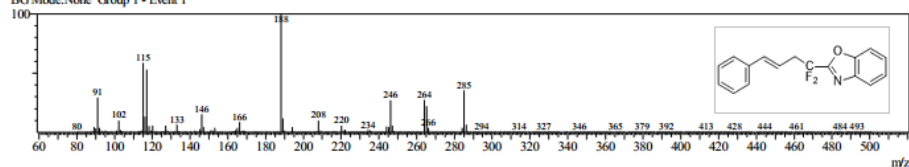

**Scheme S3.** The results of the reaction of **2** and **1k** by GC-MS

Conclusion: The alkane **5k** (GC-MS 7.600 min) arisen from radical abstracting hydrogen atom. The formation of **5k** was deduced that this reaction was to undergo a free radical process. The product **3k'** was isolated and detected by  $^{19}\text{F}$  NMR and GC-MS (7.775 min).

## 4. Preliminary mechanistic study

### 4.1 The effect of TEMPO on the standard reaction

**Table S5.** The effect of TEMPO on the standard reaction

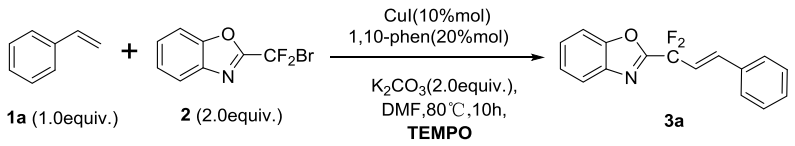

| Entry | TEMPO (equiv) | Yield (%) <sup>a</sup> |
|-------|---------------|------------------------|
| 1     | —             | 94                     |
| 2     | 1.0           | 51                     |
| 3     | 2.0           | trace                  |

<sup>a</sup> Determined by <sup>19</sup>F NMR spectroscopy using PhCF<sub>3</sub> as an internal standard

Conclusion: The yield of the desired product **3a** was decreased from 94% to 51% when 1 equivalent TEMPO was added in the standard reaction system. Additionally, when 2 equivalents TEMPO was added, **3a** was hardly observed. The results implied that the reaction could involve in a radical process.

### 4.2 The results of standard reaction by GC-MS

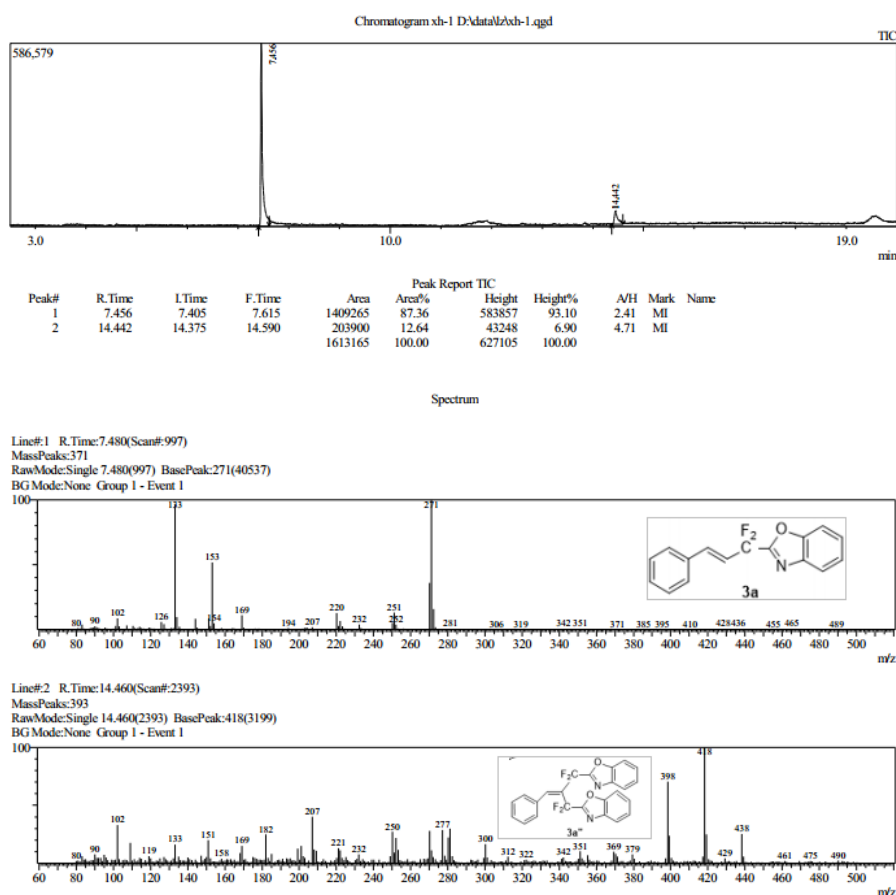

**Scheme S4.** The results of standard reaction by GC-MS

Conclusion: The product **3a''** was obtained in 8% isolated yields which was formed through the radical  $\text{ArCF}_2\cdot$  adding to **3a**. Evidences of the formation of **3a** and **3a''** further confirmed that the difluoromethylenation of alkenes was *via* intermediate difluoromethylene radical.

#### 4.3 The results of the reaction of **1a**, **2a** and alkyne **6** by GC-MS

The mixture sample was prepared through the reaction of **6**, **1a**, and **2a** under the standard conditions, then tested by the Instrument model Agilent 7890A-5975C. Gradient temperature was 190-280°C (increasing speed: 3°C/min), and the volume injected was 1μL. The results see Scheme S5.

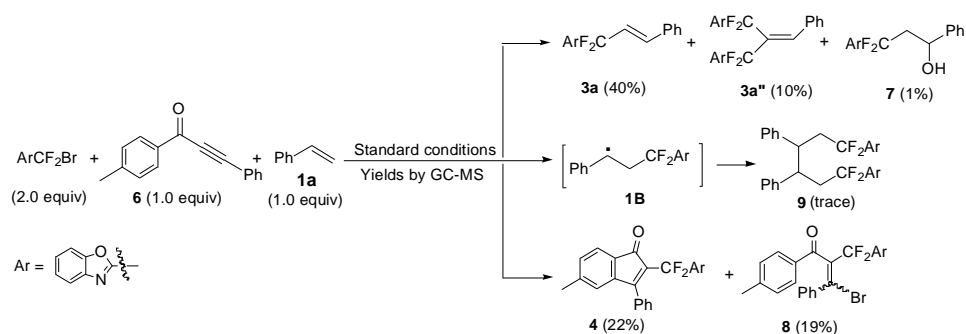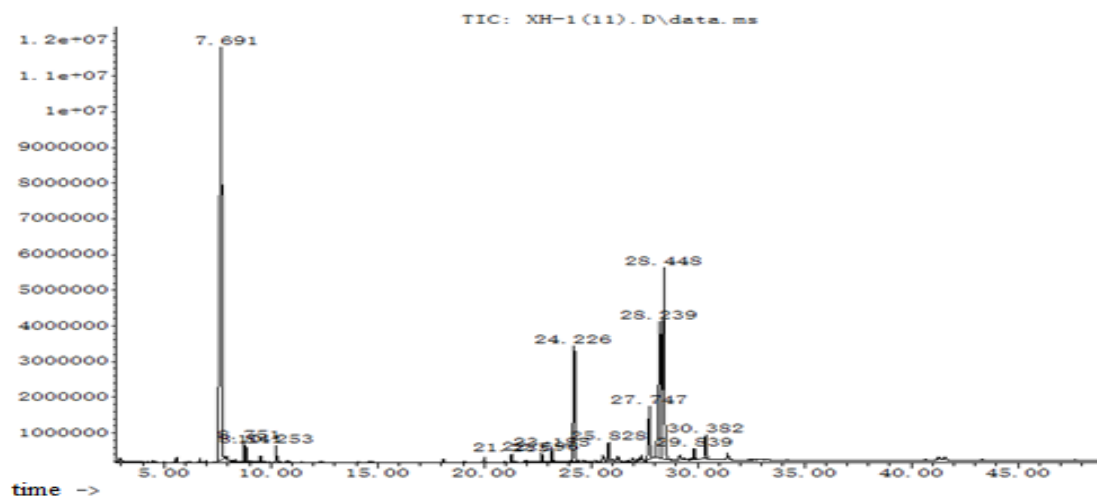

|    |        |      |      |      |      |          |           |         |         |
|----|--------|------|------|------|------|----------|-----------|---------|---------|
| 1  | 2.640  | 3    | 7    | 21   | BB   | 497157   | 8273569   | 1.20%   | 0.474%  |
| 2  | 7.691  | 598  | 628  | 646  | BV   | 11507172 | 688836802 | 100.00% | 39.503% |
| 3  | 8.751  | 744  | 759  | 765  | BV   | 569303   | 18018062  | 2.62%   | 1.033%  |
| 4  | 8.841  | 765  | 770  | 786  | VV   | 435109   | 14735273  | 2.14%   | 0.845%  |
| 5  | 10.253 | 927  | 944  | 962  | BB 2 | 462945   | 16263471  | 2.36%   | 0.933%  |
| 6  | 21.285 | 2284 | 2302 | 2320 | BB   | 232682   | 9930168   | 1.44%   | 0.569%  |
| 7  | 22.696 | 2460 | 2476 | 2494 | BB 2 | 236102   | 10554252  | 1.53%   | 0.605%  |
| 8  | 23.185 | 2517 | 2536 | 2557 | BB   | 361158   | 16545361  | 2.40%   | 0.949%  |
| 9  | 24.226 | 2636 | 2664 | 2695 | BV   | 3226750  | 169397785 | 24.59%  | 9.715%  |
| 10 | 25.828 | 2849 | 2861 | 2874 | BV 2 | 513389   | 23800239  | 3.46%   | 1.365%  |
| 11 | 27.747 | 3072 | 3098 | 3114 | BB   | 1460288  | 85308936  | 12.38%  | 4.892%  |



|    |        |      |      |      |      |         |           |        |         |
|----|--------|------|------|------|------|---------|-----------|--------|---------|
| 12 | 28.239 | 3124 | 3158 | 3164 | BV   | 3829143 | 253307010 | 36.77% | 14.526% |
| 13 | 28.448 | 3164 | 3184 | 3225 | VB   | 5323266 | 380967097 | 55.31% | 21.847% |
| 14 | 29.839 | 3344 | 3355 | 3379 | VV 2 | 308099  | 14281667  | 2.07%  | 0.819%  |
| 15 | 30.382 | 3404 | 3422 | 3451 | BB   | 658582  | 33541657  | 4.87%  | 1.924%  |

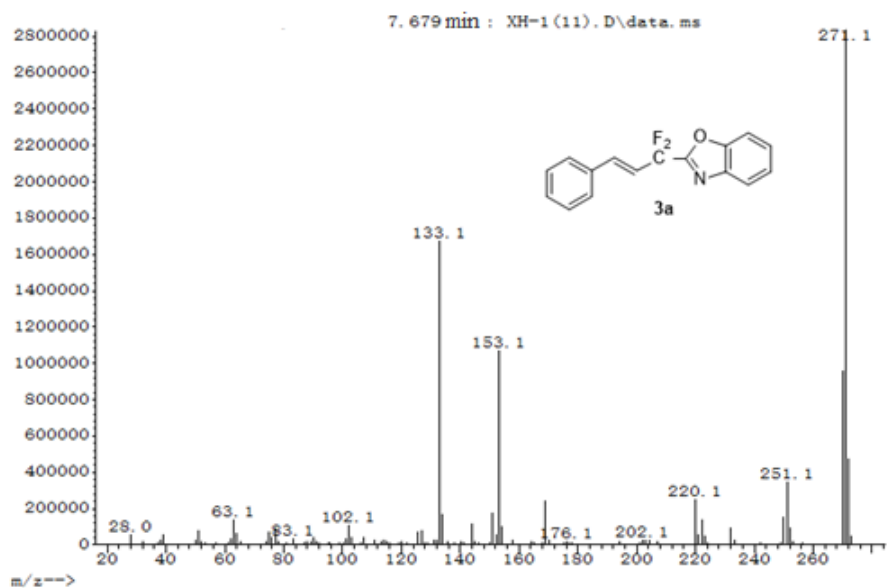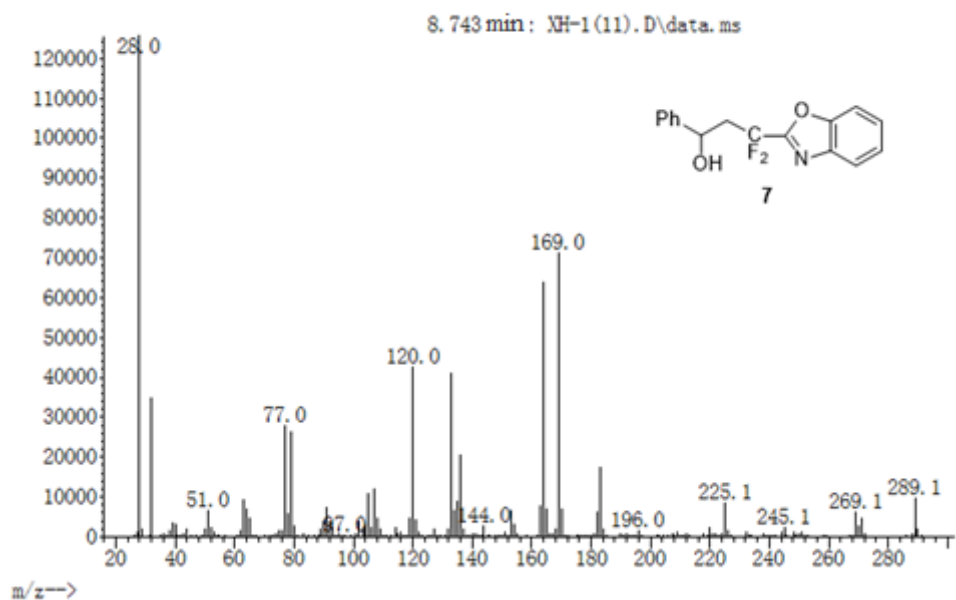

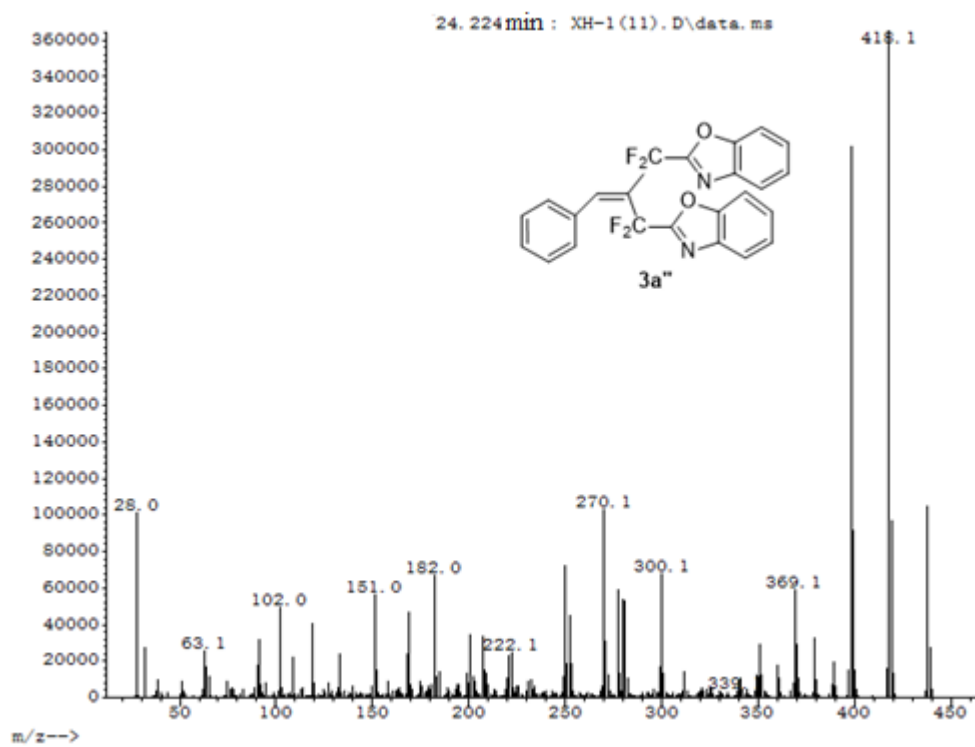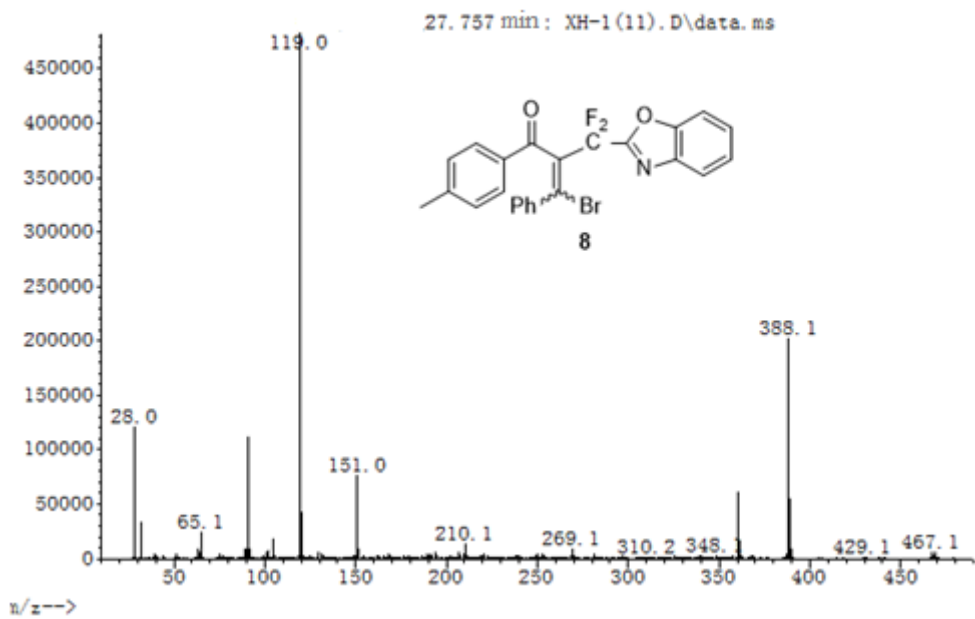

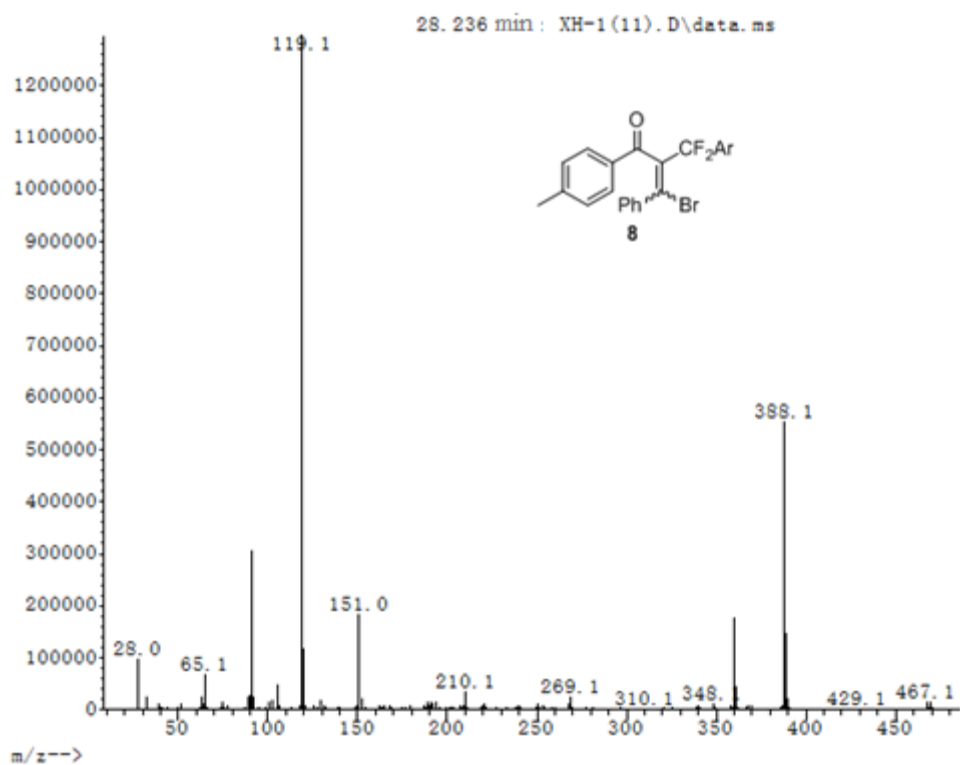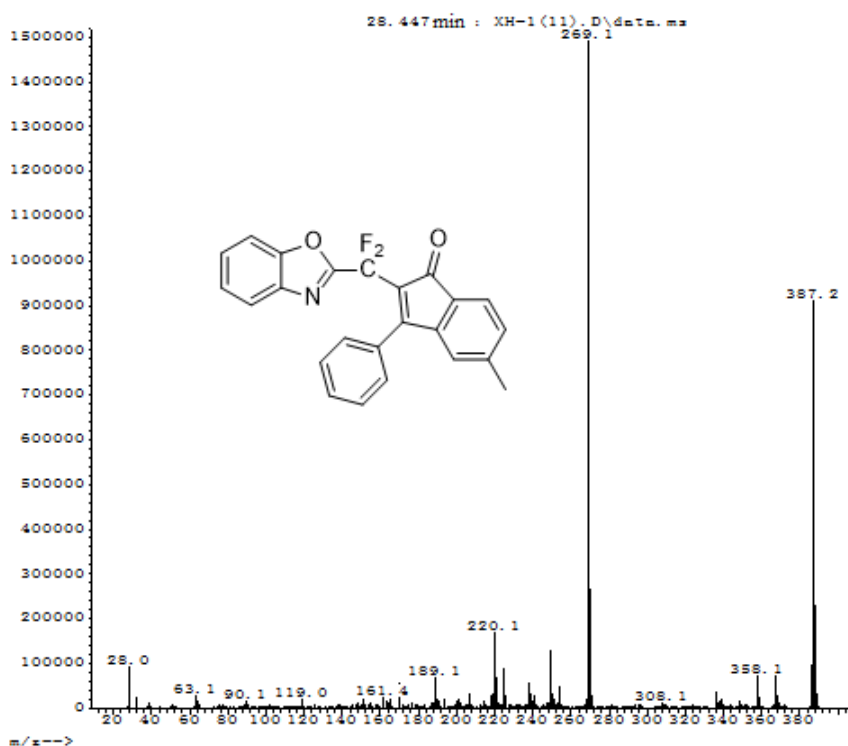

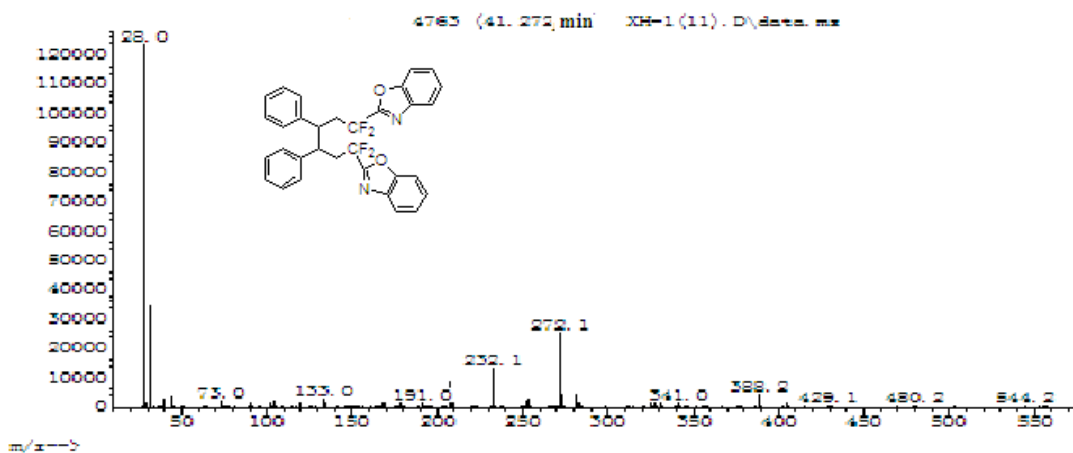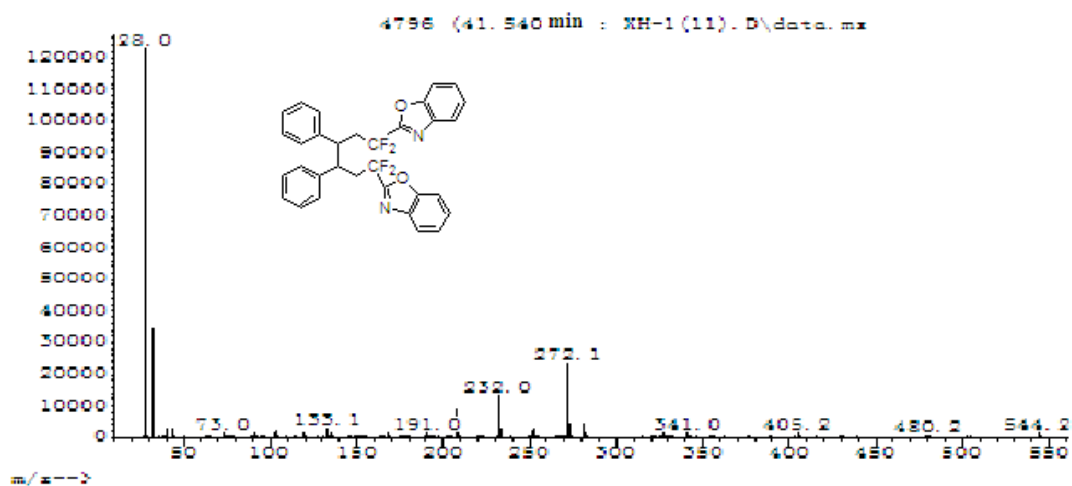

**Scheme S5.** The results of the reaction of **1a**, **2a** and alkyne **6** by GC-MS

Conclusion: Besides the products **3a** and **3a''**, the product **4**, which formed by capturing radical A, was also isolated. The formation of those products further supported the speculated mechanism. The formation of hydroxyl adducts **7** and **8** (GC-MS 27.757 min and 28.236min) could be further inferred that the carbocation was involved in this reaction. The product **9** observed through GC-MS monitoring of the reaction mixture after 8 hours was homo-coupled product of radical **1B**

## 5. $^1\text{H}$ NOESY experiments of **3j** and **3t**

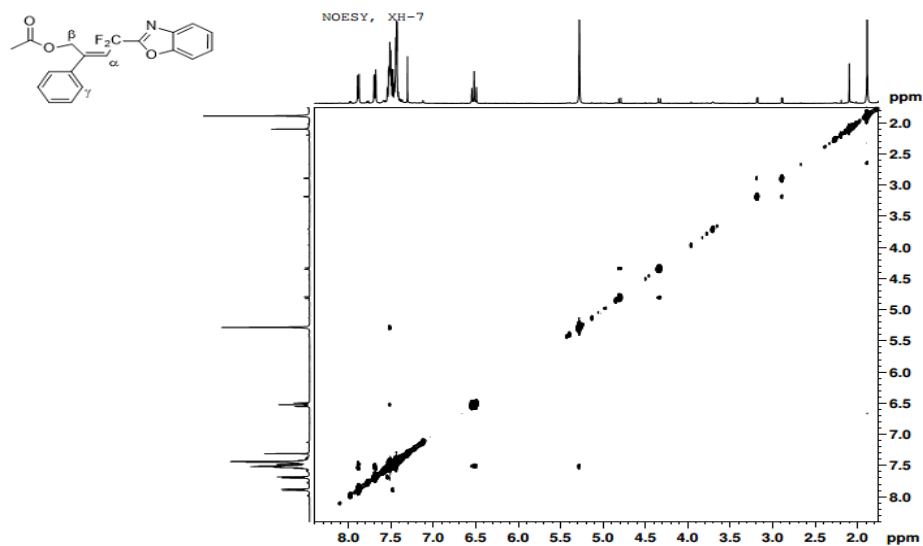

Scheme S6  $^1\text{H}$ ,  $^1\text{H}$  NOESY spectrum of **3j**

From the NOESY spectrum, the  $\alpha$ -H ( $\delta_{6.50}$ ) coupled with  $\gamma$ -H (an aromatic H), while the  $\beta$ -H ( $\delta_{5.26}$ ) (displaying a single peak) had no couple with  $\alpha$ -H. These results deduced that the geometric configuration for the double bonds of **3j** is indicated as *Z*.

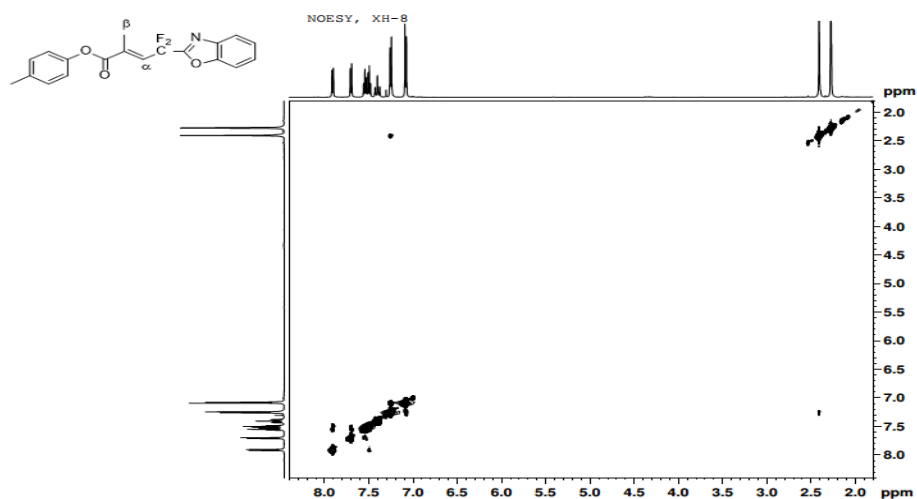

Scheme S7  $^1\text{H}$ ,  $^1\text{H}$  NOESY spectrum of **3t**

The NOESY spectrum showed that the  $\alpha$ -H ( $\delta_{7.37}$ , td) had no couple with  $\beta$ -H ( $\delta_{2.39}$ , s). Therefore, the geometric configuration for the double bonds of **3t** is indicated as *E*.

## 6. New compounds characterization

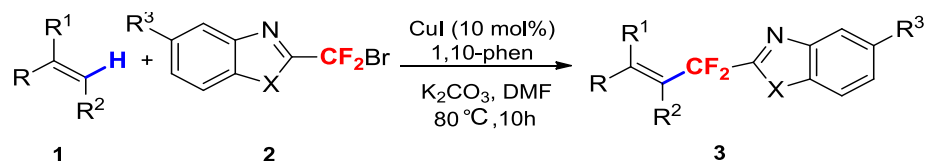

A 25 mL round-bottom flask was charged with CuI (10 mol %), 1,10-phen (20 mol %), K<sub>2</sub>CO<sub>3</sub> (2.0 equiv), **2** (0.6 mmol, 2.0 equiv), **1** (0.3 mmol) and DMF (2.5 mL) under air. The reaction mixture was stirred at 80 °C (oil bath) for 10 h. Then the reaction mixture was cooled to room temperature. The crude product was purified with silica gel chromatography (petroleum ether/ethyl acetate = 20/1) to give product **3**.

### (*E*)-2-(1,1-difluoro-3-phenylallyl)benzo[*d*]oxazole (**3a**)

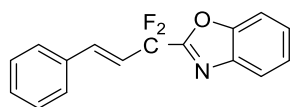

Light yellow solid, 86%, mp: 52-54 °C; <sup>1</sup>H NMR (500 MHz, CDCl<sub>3</sub>) δ 7.85 (d, *J* = 7.9 Hz, 1H), 7.61 (d, *J* = 8.0 Hz, 1H), 7.51-7.48 (m, 2H), 7.45 (td, *J* = 7.4, 1.5 Hz, 1H), 7.41 (td, *J* = 7.5, 1.3 Hz, 1H), 7.39-7.32 (m, 3H), 7.22 (dt, *J* = 16.2, 2.4 Hz, 1H), 6.67 (dt, *J* = 16.2, 11.0 Hz, 1H). <sup>19</sup>F NMR (470 MHz, CDCl<sub>3</sub>) δ -94.63 (dd, *J* = 11.0, 2.4 Hz). <sup>13</sup>C NMR (125 MHz, CDCl<sub>3</sub>) δ 158.0 (t, <sup>2</sup>*J*<sub>C-F</sub> = 36.0 Hz), 150.7, 140.1, 136.8 (t, <sup>3</sup>*J*<sub>C-F</sub> = 9.0 Hz), 134.1, 129.7, 128.9, 127.6, 126.9, 125.4, 121.3, 119.5 (t, <sup>2</sup>*J*<sub>C-F</sub> = 25.1 Hz), 113.5 (t, <sup>1</sup>*J*<sub>C-F</sub> = 239.7 Hz), 111.4. IR: 3060, 1652, 1610, 1443, 1193, 1054, 977, 749 cm<sup>-1</sup>. HRMS (ESI) calcd. for C<sub>16</sub>H<sub>12</sub>F<sub>2</sub>NO [M+H]<sup>+</sup> 272.0887, found: 272.0890.

### 2,2'-(2-benzylidene-1,1,3,3-tetrafluoropropane-1,3-diyl)bis(benzo[*d*]oxazole) (**3a''**)

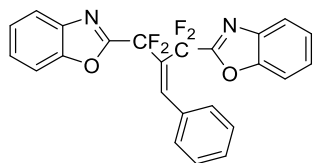

Colorless solid, 8%, mp: 109-110 °C; <sup>1</sup>H NMR (500 MHz, CDCl<sub>3</sub>) δ 7.94 (s, 1H), 7.87 (d, *J* = 7.9 Hz, 1H), 7.67 (d, *J* = 8.1 Hz, 2H), 7.54-7.44 (m, 3H), 7.43-7.38 (m, 1H), 7.38-7.30 (m, 3H), 7.21-7.08 (m, 3H). <sup>19</sup>F NMR (470 MHz, CDCl<sub>3</sub>) δ -88.26 (t, *J* = 7.4 Hz), -93.56 (t, *J* = 7.4 Hz). <sup>13</sup>C NMR (125 MHz, CDCl<sub>3</sub>) δ 157.5 (t, <sup>2</sup>*J*<sub>C-F</sub> = 35.2 Hz), 156.5 (t, <sup>2</sup>*J*<sub>C-F</sub> = 33.5 Hz), 150.7, 150.3, 143.6-142.6 (m), 140.2, 139.8, 131.9, 129.2, 128.7, 127.9, 126.9, 126.9, 125.3, 125.2, 121.5, 121.3, 112.8 (t, <sup>1</sup>*J*<sub>C-F</sub> = 246.8 Hz), 112.6 (t, <sup>1</sup>*J*<sub>C-F</sub> = 246.8 Hz), 111.5, 111.2. IR: 3024, 1651, 1449, 1184, 1082, 752 cm<sup>-1</sup>. HRMS (ESI) calcd. for C<sub>24</sub>H<sub>15</sub>F<sub>4</sub>N<sub>2</sub>O<sub>2</sub> [M+H]<sup>+</sup> 438.0991, found: 438.0989.

### 2-(benzo[*d*]oxazol-2-ylidifluoromethyl)-5-methyl-3-phenyl-1H-inden-1-one (**4**)

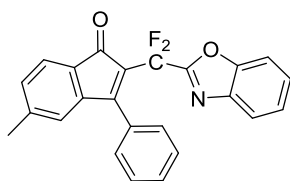

Yellow solid, 16%, mp: 164-166 °C;  $^1\text{H}$  NMR (500 MHz,  $\text{CDCl}_3$ )  $\delta$  7.79 (d,  $J = 7.8$  Hz, 1H), 7.56 (d,  $J = 8.0$  Hz, 1H), 7.52 (d,  $J = 7.1$  Hz, 2H), 7.44 (m, 6H), 7.19 (d,  $J = 7.3$  Hz, 1H), 6.90 (s, 1H), 2.36 (s, 3H).  $^{19}\text{F}$  NMR (470 MHz,  $\text{CDCl}_3$ )  $\delta$  -91.51 (s).  $^{13}\text{C}$  NMR (125 MHz,  $\text{CDCl}_3$ )  $\delta$  191.9 (t,  $^3J_{\text{C-F}} = 2.4$  Hz), 162.9 (t,  $^3J_{\text{C-F}} = 3.9$  Hz), 157.4 (t,  $^2J_{\text{C-F}} = 34.3$  Hz), 150.6, 145.1, 144.3, 140.1, 130.9, 130.8, 129.9, 128.3, 127.9, 126.7, 125.8, 125.2, 124.9 (t,  $^2J_{\text{C-F}} = 24.2$  Hz), 124.6, 123.6, 121.5, 121.3, 112.4 (t,  $^1J_{\text{C-F}} = 241.6$  Hz), 111.4, 22.0. IR: 3037, 2926, 1711, 1606, 1514, 1194, 1034, 743  $\text{cm}^{-1}$ . HRMS (ESI) calcd. for  $\text{C}_{24}\text{H}_{16}\text{F}_2\text{NO}_2$   $[\text{M}+\text{H}]^+$  388.1149, found: 388.1153.

**(E)-2-(1,1-difluoro-3-(p-tolyl)allyl)benzo[d]oxazole (3b)**

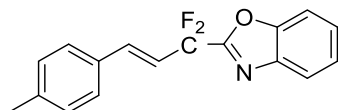

Light yellow solid, 61%, mp: 38-40 °C;  $^1\text{H}$  NMR (500 MHz,  $\text{CDCl}_3$ )  $\delta$  7.88-7.85 (m, 1H), 7.67-7.64 (m, 1H), 7.51-7.41 (m, 4H), 7.23-7.17 (m, 3H), 6.62 (dt,  $J = 16.1, 11.0$  Hz, 1H), 2.39 (s, 3H).  $^{19}\text{F}$  NMR (470 MHz,  $\text{CDCl}_3$ )  $\delta$  -94.24 (d,  $J = 11.0$  Hz).  $^{13}\text{C}$  NMR (125 MHz,  $\text{CDCl}_3$ )  $\delta$  158.2 (t,  $^2J_{\text{C-F}} = 36.1$  Hz), 150.7, 140.1, 139.9, 136.7 (t,  $^3J_{\text{C-F}} = 9.1$  Hz), 131.3, 129.6, 127.6, 126.8, 125.3, 121.3, 118.3 (t,  $^2J_{\text{C-F}} = 24.8$  Hz), 113.6 (t,  $^1J_{\text{C-F}} = 239.5$  Hz), 111.4, 21.4. IR: 3013, 2916, 1609, 1448, 1190, 1043, 980, 748  $\text{cm}^{-1}$ . HRMS (ESI) calcd. for  $\text{C}_{17}\text{H}_{14}\text{F}_2\text{NO}$   $[\text{M}+\text{H}]^+$  286.1043, found: 286.1041.

**(E)-2-(1,1-difluoro-3-(4-methoxyphenyl)allyl)benzo[d]oxazole (3c)**

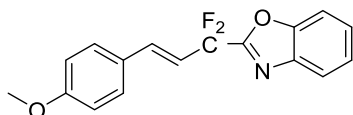

Yellow solid, 74%; mp: 81-82 °C;  $^1\text{H}$  NMR (500 MHz,  $\text{CDCl}_3$ )  $\delta$  7.86 (dd,  $J = 7.7, 1.5$  Hz, 1H), 7.65 (dd,  $J = 7.7, 1.1$  Hz, 1H), 7.52-7.41 (m, 4H), 7.16 (dt,  $J = 16.1, 2.4$  Hz, 1H), 6.96-6.89 (m, 2H), 6.52 (dt,  $J = 16.1, 11.0$  Hz, 1H), 3.85 (s, 3H).  $^{19}\text{F}$  NMR (470 MHz,  $\text{CDCl}_3$ )  $\delta$  -93.88 (dd,  $J = 11.0, 2.4$  Hz).  $^{13}\text{C}$  NMR (125 MHz,  $\text{CDCl}_3$ )  $\delta$  160.8, 158.3 (t,  $^2J_{\text{C-F}} = 36.4$  Hz), 150.7, 140.1, 136.2 (t,  $^3J_{\text{C-F}} = 9.1$  Hz), 129.1, 126.8, 125.3, 121.3, 117.0 (t,  $^2J_{\text{C-F}} = 25.1$  Hz), 114.2, 113.7 (t,  $^1J_{\text{C-F}} = 239.5$  Hz), 111.4, 55.4. IR: 3029, 2964, 1605, 1511, 1216, 1037, 969, 756  $\text{cm}^{-1}$ . HRMS (ESI) calcd. for  $\text{C}_{17}\text{H}_{14}\text{F}_2\text{NO}_2$   $[\text{M}+\text{H}]^+$  302.0993, found: 302.0995.

**(E)-2-(3-(4-chlorophenyl)-1,1-difluoroallyl)benzo[d]oxazole (3d)**

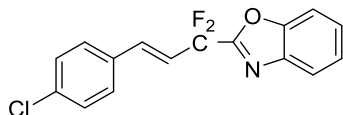

Light yellow solid, 89%, mp: 89-91 °C; <sup>1</sup>H NMR (500 MHz, CDCl<sub>3</sub>) δ 7.86 (d, *J* = 8.1 Hz, 1H), 7.66 (d, *J* = 8.1 Hz, 1H), 7.54-7.41 (m, 4H), 7.37 (m, 2H), 7.18 (dt, *J* = 16.1, 2.2 Hz, 1H), 6.65 (dt, *J* = 16.1, 10.9 Hz, 1H). <sup>19</sup>F NMR (470 MHz, CDCl<sub>3</sub>) δ -94.66 (d, *J* = 10.9 Hz). <sup>13</sup>C NMR (125 MHz, CDCl<sub>3</sub>) δ 157.8 (t, <sup>2</sup>*J*<sub>C-F</sub> = 35.8 Hz), 150.7, 140.0, 135.6, 135.4 (t, <sup>3</sup>*J*<sub>C-F</sub> = 9.1 Hz), 132.6, 129.1, 128.8, 127.0, 125.4, 121.3, 120.0 (t, <sup>2</sup>*J*<sub>C-F</sub> = 25.3 Hz), 113.3 (t, <sup>1</sup>*J*<sub>C-F</sub> = 240.1 Hz), 110.4. IR: 3035, 1658, 1489, 1189, 1077, 1044, 970, 811, 745cm<sup>-1</sup>. HRMS (ESI) calcd. for C<sub>16</sub>H<sub>11</sub>ClF<sub>2</sub>NO [M+H]<sup>+</sup> 306.0497, found: 306.0495.

**(*E*)-2-(1,1-difluoro-3-(4-fluorophenyl)allyl)benzo[d]oxazole (3e)**

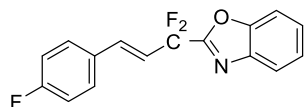

Light yellow solid, 83%, mp: 67-68 °C; <sup>1</sup>H NMR (500 MHz, CDCl<sub>3</sub>) δ 7.86 (dd, *J* = 8.0, 1.2 Hz, 1H), 7.64 (dd, *J* = 8.1, 1.2 Hz, 1H), 7.59-7.34 (m, 4H), 7.19 (dt, *J* = 16.2, 2.3 Hz, 1H), 7.11-7.06 (m, 2H), 6.60 (dt, *J* = 16.2, 11.0 Hz, 1H). <sup>19</sup>F NMR (470 MHz, CDCl<sub>3</sub>) δ -94.41 (dd, *J* = 11.0, 2.3 Hz), -110.72 (ddd, *J* = 13.6, 8.5, 5.0 Hz). <sup>13</sup>C NMR (125 MHz, CDCl<sub>3</sub>) δ 163.5 (d, <sup>1</sup>*J*<sub>C-F</sub> = 250.1 Hz), 157.9 (t, <sup>2</sup>*J*<sub>C-F</sub> = 35.9 Hz), 150.7, 140.0, 135.5 (t, <sup>3</sup>*J*<sub>C-F</sub> = 9.1 Hz), 130.3, 129.4 (d, <sup>3</sup>*J*<sub>C-F</sub> = 8.4 Hz), 126.9, 125.4, 121.3, 119.2 (t, <sup>2</sup>*J*<sub>C-F</sub> = 25.0 Hz), 115.9 (d, <sup>2</sup>*J*<sub>C-F</sub> = 21.9 Hz), 112.4 (t, <sup>1</sup>*J*<sub>C-F</sub> = 239.9 Hz), 111.4. IR: 3040, 1605, 1059, 1223, 1161, 1044, 970, 746 cm<sup>-1</sup>. HRMS (ESI) calcd. for C<sub>16</sub>H<sub>11</sub>F<sub>3</sub>NO [M+H]<sup>+</sup> 290.0793, found: 290.0798.

**(*E*)-2-(1,1-difluoro-3-(4-nitrophenyl)allyl)benzo[d]oxazole (3f)**

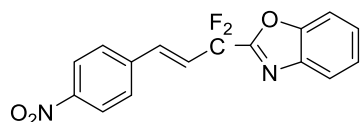

Light yellow solid, 49%, mp: 151-152 °C; <sup>1</sup>H NMR (500 MHz, CDCl<sub>3</sub>) δ 8.26 (d, *J* = 8.7 Hz, 2H), 7.85 (d, *J* = 7.9 Hz, 1H), 7.67 (m, 3H), 7.56-7.39 (m, 2H), 7.31 (dt, *J* = 16.1, 2.3 Hz, 1H), 6.84 (dt, *J* = 16.1, 10.7 Hz, 1H). <sup>19</sup>F NMR (470 MHz, CDCl<sub>3</sub>) δ -95.37 (dd, *J* = 10.7, 2.3 Hz). <sup>13</sup>C NMR (125 MHz, CDCl<sub>3</sub>) δ 157.3 (t, <sup>2</sup>*J*<sub>C-F</sub> = 35.2 Hz), 150.7, 148.3, 140.2, 139.9, 134.4 (t, <sup>3</sup>*J*<sub>C-F</sub> = 9.0 Hz), 128.3, 127.2, 125.5, 124.1, 123.8 (t, <sup>2</sup>*J*<sub>C-F</sub> = 25.1 Hz), 121.4, 112.8 (t, <sup>1</sup>*J*<sub>C-F</sub> = 240.4 Hz), 111.5. IR: 3024, 1602, 1518, 1343, 1192, 1061, 974, 747cm<sup>-1</sup>. HRMS (ESI) calcd. for C<sub>16</sub>H<sub>11</sub>F<sub>2</sub>N<sub>2</sub>O<sub>3</sub> [M+H]<sup>+</sup> 317.0738, found: 317.0741.

**(*E*)-2-(3-(2-bromophenyl)-1,1-difluoroallyl)benzo[d]oxazole (3g)**

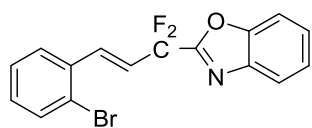

Light yellow solid, 67%, mp: 68-69 °C; <sup>1</sup>H NMR (500 MHz, CDCl<sub>3</sub>) δ 7.85 (dd, *J* = 7.5, 1.0 Hz, 1H),



7.67 - 7.61 (m, 3H), 7.59 (dd,  $J = 8.0, 1.0$  Hz, 1H), 7.47 (td,  $J = 7.5, 1.2$  Hz, 1H), 7.43 (td,  $J = 7.6, 1.1$  Hz, 1H), 7.32 (td,  $J = 7.2, 0.5$  Hz, 1H), 7.20 (td,  $J = 7.9, 1.5$  Hz, 1H), 6.65 (dt,  $J = 16.0, 10.9$  Hz, 1H).  $^{19}\text{F}$  NMR (470 MHz,  $\text{CDCl}_3$ )  $\delta$  -94.82 (dd,  $J = 10.9, 2.5$  Hz).  $^{13}\text{C}$  NMR (125 MHz,  $\text{CDCl}_3$ )  $\delta$  157.7 (t,  $^2J_{\text{C-F}} = 35.6$  Hz), 150.7, 140.0, 135.5 (t,  $^3J_{\text{C-F}} = 9.2$  Hz), 134.1, 133.3, 130.8, 127.7, 127.7, 122.1 (t,  $^2J_{\text{C-F}} = 24.9$  Hz), 121.3, 113.1 (t,  $^1J_{\text{C-F}} = 240.5$  Hz), 111.4. IR: 3023, 1610, 1457, 1193, 1049, 960, 752, 658  $\text{cm}^{-1}$ . HRMS (ESI) calcd. for  $\text{C}_{16}\text{H}_{11}\text{BrF}_2\text{NO}$   $[\text{M}+\text{H}]^+$  349.9992, found: 349.9996.

**(E)-2-(3-(3-bromophenyl)-1,1-difluoroallyl)benzo[d]oxazole (3h)**

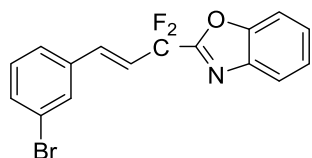

Yellow oil, 54%;  $^1\text{H}$  NMR (500 MHz,  $\text{CDCl}_3$ )  $\delta$  7.85 (dd,  $J = 8.0, 1.0$  Hz, 1H), 7.67–7.61 (m, 2H), 7.51–7.46 (m, 2H), 7.44 (dd,  $J = 7.8, 1.2$  Hz, 1H), 7.41 (dd,  $J = 7.9, 1.1$  Hz, 1H), 7.25 (t,  $J = 7.9$  Hz, 1H), 7.15 (dt,  $J = 16.1, 2.4$  Hz, 1H), 6.68 (dt,  $J = 16.1, 10.8$  Hz, 1H).  $^{19}\text{F}$  NMR (470 MHz,  $\text{CDCl}_3$ )  $\delta$  -94.77 (dd,  $J = 10.8, 2.4$  Hz).  $^{13}\text{C}$  NMR (125 MHz,  $\text{CDCl}_3$ )  $\delta$  157.7 (t,  $^2J_{\text{C-F}} = 35.7$  Hz), 150.7, 140.0, 136.1, 135.2 (t,  $^3J_{\text{C-F}} = 9.0$  Hz), 132.6, 130.3, 127.0, 126.3, 125.4, 123.0, 121.4, 121.0 (t,  $^2J_{\text{C-F}} = 25.1$  Hz), 113.1 (t,  $^1J_{\text{C-F}} = 240.21$  Hz), 111.5. IR: 3023, 1659, 1565, 1195, 1038, 968, 747, 675  $\text{cm}^{-1}$ . HRMS (ESI) calcd. for  $\text{C}_{16}\text{H}_{11}\text{BrF}_2\text{NO}$   $[\text{M}+\text{H}]^+$  349.9992, found: 349.9987.

**(E)-2-(3-(4-bromophenyl)-1,1-difluoroallyl)benzo[d]oxazole (3i)**

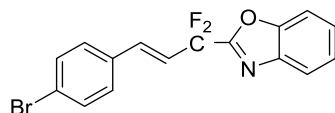

Yellow solid, 62%, mp: 111–112  $^{\circ}\text{C}$ ;  $^1\text{H}$  NMR (500 MHz,  $\text{CDCl}_3$ )  $\delta$  7.86 (d,  $J = 8.0$  Hz, 1H), 7.66 (d,  $J = 8.0$  Hz, 1H), 7.57–7.52 (m, 2H), 7.50 (td,  $J = 7.6, 1.2$  Hz, 1H), 7.45 (td,  $J = 7.6, 1.1$  Hz, 1H), 7.39 (m, 2H), 7.17 (dt,  $J = 16.1, 2.4$  Hz, 1H), 6.67 (dt,  $J = 16.1, 10.9$  Hz, 1H).  $^{19}\text{F}$  NMR (470 MHz,  $\text{CDCl}_3$ )  $\delta$  -94.73 (dd,  $J = 10.9, 2.4$  Hz).  $^{13}\text{C}$  NMR (125 MHz,  $\text{CDCl}_3$ )  $\delta$  157.7 (t,  $^2J_{\text{C-F}} = 35.9$  Hz), 150.7, 140.0, 135.5 (t,  $^3J_{\text{C-F}} = 9.0$  Hz), 133.0, 132.1, 129.1, 127.0, 125.4, 123.9, 121.4, 120.2 (t,  $^2J_{\text{C-F}} = 25.2$  Hz), 113.2 (t,  $^1J_{\text{C-F}} = 239.7$  Hz), 111.5. IR: 3037, 1652, 1567, 1187, 1045, 969, 744, 562  $\text{cm}^{-1}$ . HRMS (ESI) calcd. for  $\text{C}_{16}\text{H}_{11}\text{BrF}_2\text{NO}$   $[\text{M}+\text{H}]^+$  349.9992, found: 349.9993.

**(Z)-4-(benzo[d]oxazol-2-yl)-4,4-difluoro-2-phenylbut-2-en-1-yl acetate (3j)**

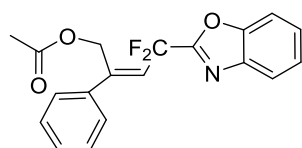

Light yellow solid, 51%, mp: 127-129°C; <sup>1</sup>H NMR (500 MHz, CDCl<sub>3</sub>) δ 7.86 (d, *J* = 8.2 Hz, 1H), 7.67 (d, *J* = 8.2 Hz, 1H), 7.51-7.46 (m, 3H), 7.47-7.39 (m, 4H), 6.50 (t, *J* = 13.7 Hz, 1H), 5.26 (s, 2H), 1.86 (s, 3H). <sup>19</sup>F NMR (470 MHz, CDCl<sub>3</sub>) δ -88.19 (d, *J* = 13.7 Hz). <sup>13</sup>C NMR (125 MHz, CDCl<sub>3</sub>) δ 170.4, 157.8 (t, <sup>2</sup>*J*<sub>C-F</sub> = 35.4 Hz), 150.8, 146.4 (t, <sup>3</sup>*J*<sub>C-F</sub> = 6.1 Hz), 140.0, 138.0, 129.2, 128.6, 127.0, 126.9, 125.4, 123.0 (t, <sup>2</sup>*J*<sub>C-F</sub> = 26.9 Hz), 121.4, 113.0 (t, <sup>1</sup>*J*<sub>C-F</sub> = 240.2 Hz), 111.5, 60.8 (t, <sup>4</sup>*J*<sub>C-F</sub> = 2.4 Hz), 20.5. IR: 3012, 2925, 1743, 1646, 1514, 1231, 1034, 745, 696 cm<sup>-1</sup>. HRMS (ESI) calcd. for C<sub>19</sub>H<sub>16</sub>F<sub>2</sub>NO [M+H]<sup>+</sup> 344.1098, found: 344.1201.

**(*E*)-2-(1,1-difluoro-4-phenylbut-2-en-1-yl)benzo[d]oxazole (3k)**

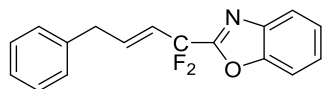

Colorless oil, 40%; <sup>1</sup>H NMR (500 MHz, CDCl<sub>3</sub>) δ 7.85 (d, *J* = 8.0 Hz, 1H), 7.64 (d, *J* = 7.9 Hz, 1H), 7.48 (td, *J* = 7.2, 1.2 Hz, 1H), 7.44 (td, *J* = 7.5, 1.1 Hz, 1H), 7.40-7.32 (m, 2H), 7.30-7.27 (m, 1H), 7.26-7.21 (m, 2H), 6.58 (dt, *J* = 15.7, 6.9, 2.4 Hz, 1H), 6.08 (dt, *J* = 15.7, 10.6, 1.5 Hz, 1H), 3.66-3.49 (m, 2H). <sup>19</sup>F NMR (470 MHz, CDCl<sub>3</sub>) δ -94.45 (dd, *J* = 10.6, 2.4 Hz). <sup>13</sup>C NMR (125 MHz, CDCl<sub>3</sub>) δ 158.1 (t, <sup>2</sup>*J*<sub>C-F</sub> = 35.6 Hz), 150.7, 140.0, 138.3 (t, <sup>3</sup>*J*<sub>C-F</sub> = 8.6 Hz), 137.7, 128.8, 128.7, 126.8, 126.7, 125.3, 122.9 (t, <sup>2</sup>*J*<sub>C-F</sub> = 25.3 Hz), 121.3, 113.0 (t, <sup>1</sup>*J*<sub>C-F</sub> = 239.2 Hz), 111.4, 38.1. IR: 3030, 2910, 1610, 1491, 1210, 1041, 975, 750 cm<sup>-1</sup>. HRMS (ESI) calcd. for C<sub>17</sub>H<sub>14</sub>F<sub>2</sub>NO [M+H]<sup>+</sup> 286.1043, found: 286.1041.

**(*E*)-2-(1,1-difluoro-4-phenylbut-3-en-1-yl)benzo[d]oxazole (3k')**

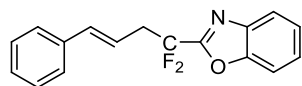

Light yellow oil, 15%; <sup>1</sup>H NMR (500 MHz, CDCl<sub>3</sub>) δ 7.90 (d, *J* = 7.5 Hz, 1H), 7.64 (dd, *J* = 7.2, 1.2 Hz, 1H), 7.46 (m, 2H), 7.42 (d, *J* = 7.4 Hz, 2H), 7.35 (t, *J* = 7.5 Hz, 2H), 7.33 – 7.25 (m, 1H), 6.71 (d, *J* = 16.0 Hz, 1H), 6.35 (td, *J* = 15.9, 7.2 Hz, 1H), 3.47 (td, *J* = 16.0, 7.2 Hz, 2H). <sup>19</sup>F NMR (470 MHz, CDCl<sub>3</sub>) δ -97.22 (t, *J* = 16.0 Hz). <sup>13</sup>C NMR (125 MHz, CDCl<sub>3</sub>) δ 157.85 (t, <sup>2</sup>*J*<sub>C-F</sub> = 33.5 Hz), 150.67, 140.05, 136.76, 136.53, 128.61, 127.97, 126.90, 126.50, 125.33, 121.33, 118.19 (t, <sup>3</sup>*J*<sub>C-F</sub> = 4.8 Hz), 115.91 (t, <sup>1</sup>*J*<sub>C-F</sub> = 242.2 Hz), 111.44, 39.80 (t, <sup>2</sup>*J*<sub>C-F</sub> = 24.3 Hz). IR: 3008, 1606, 1485, 1206, 1030, 968, 746 cm<sup>-1</sup>. HRMS (ESI) calcd. for C<sub>17</sub>H<sub>14</sub>F<sub>2</sub>NO [M+H]<sup>+</sup> 286.1043, found: 286.1047.

**(*E*)-2-(1,1-difluoro-5-phenylpent-2-en-1-yl)benzo[d]oxazole (3l)**

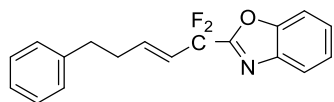

Light red oil, 58%;  $^1\text{H}$  NMR (500 MHz,  $\text{CDCl}_3$ )  $\delta$  7.89 (dd,  $J = 7.4, 1.5$  Hz, 1H), 7.67-7.62 (dd,  $J = 7.8, 1.5$  Hz, 1H), 7.52-7.43 (m, 2H), 7.35-7.30 (m, 2H), 7.28-7.21 (m, 3H), 6.51 (dtt,  $J = 15.8, 6.7, 2.3$  Hz, 1H), 6.13 (dt,  $J = 15.8, 10.5$  Hz, 1H), 2.89-2.81 (m, 2H), 2.64-2.52 (m, 2H).  $^{19}\text{F}$  NMR (470 MHz,  $\text{CDCl}_3$ )  $\delta$  -94.77 (dd,  $J = 10.9, 2.4$  Hz).  $^{13}\text{C}$  NMR (125 MHz,  $\text{CDCl}_3$ )  $\delta$  158.2 (t,  $^2J_{\text{C-F}} = 35.9$  Hz), 150.7, 140.8, 140.1, 138.9 (t,  $^3J_{\text{C-F}} = 8.6$  Hz), 128.5, 126.8, 126.2, 125.3, 122.4 (t,  $^2J_{\text{C-F}} = 25.1$  Hz), 121.3, 113.1 (t,  $^1J_{\text{C-F}} = 239.1$  Hz), 111.4, 34.6, 33.7. IR: 3029, 2931, 1676, 1448, 1213, 1032, 969, 749  $\text{cm}^{-1}$ . HRMS (ESI) calcd. for  $\text{C}_{18}\text{H}_{16}\text{F}_2\text{NO}$   $[\text{M}+\text{H}]^+$  300.1200, found: 300.1205.

#### 2-(2-(2,3-dihydro-1H-inden-1-yl)-1,1-difluoroethyl)benzo[d]oxazole (4l)

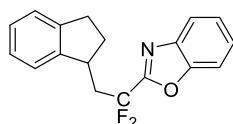

Light yellow oil, 7%;  $^1\text{H}$  NMR (500 MHz,  $\text{CDCl}_3$ )  $\delta$  7.84 (d,  $J = 7.6$  Hz, 1H), 7.65 (d,  $J = 7.8$  Hz, 1H), 7.49 (dtd,  $J = 22.0, 7.8, 1.1$  Hz, 2H), 7.32 – 7.26 (m, 1H), 7.22 (m, 3H), 4.32 (dtd,  $J = 9.9, 6.7, 4.0$  Hz, 1H), 3.25 (qd,  $J = 15.9, 7.2$  Hz, 1H), 3.17 – 3.04 (dtd,  $J = 17.8, 12.1, 6.0$  Hz, 1H), 2.96 (ddd,  $J = 14.0, 9.1, 5.0$  Hz, 1H), 2.82 (ddd,  $J = 16.0, 9.0, 2.0$  Hz, 1H), 2.37 – 2.17 (m, 2H).  $^{19}\text{F}$  NMR (470 MHz,  $\text{CDCl}_3$ )  $\delta$  -93.89 (ddd,  $J = 278.2, 17.3, 12.1$  Hz), -99.19 (dt,  $J = 278.2, 16.5$  Hz).  $^{13}\text{C}$  NMR (125 MHz,  $\text{CDCl}_3$ )  $\delta$  157.11 (t,  $^2J_{\text{C-F}} = 33.1$  Hz), 150.58, 140.21, 139.90, 128.53, 128.49, 127.02, 126.25, 125.41, 121.36, 115.51 (t,  $^1J_{\text{C-F}} = 243.1$  Hz), 111.48, 45.40 (t,  $^3J_{\text{C-F}} = 3.8$  Hz), 45.02 (t,  $^2J_{\text{C-F}} = 24.0$  Hz), 40.60, 33.32. IR: 3022, 2927, 1688, 1469, 1223, 1068, 978, 747  $\text{cm}^{-1}$ . HRMS (ESI) calcd. for  $\text{C}_{18}\text{H}_{16}\text{F}_2\text{NO}$   $[\text{M}+\text{H}]^+$  300.1200, found: 300.1204.

#### 2-(1,1-difluoro-5-phenylpentyl)benzo[d]oxazole (5l)

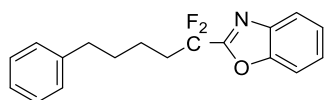

Light yellow oil, 9%;  $^1\text{H}$  NMR (500 MHz,  $\text{CDCl}_3$ )  $\delta$  7.85 (d,  $J = 7.9$  Hz, 1H), 7.65 (d,  $J = 7.9$  Hz, 1H), 7.52 – 7.43 (m, 2H), 7.31 – 7.27 (m, 2H), 7.20 (t,  $J = 7.8$  Hz, 3H), 2.68 (t,  $J = 7.7$  Hz, 2H), 2.58 – 2.44 (m, 2H), 1.77 (m, 2H), 1.69 (m, 2H).  $^{19}\text{F}$  NMR (470 MHz,  $\text{CDCl}_3$ )  $\delta$  -98.20 (t,  $J = 16.7$  Hz).  $^{13}\text{C}$  NMR (125 MHz,  $\text{CDCl}_3$ )  $\delta$  158.17 (t,  $^2J_{\text{C-F}} = 33.9$  Hz), 150.57, 141.87, 139.98, 128.35, 126.77, 125.85, 125.26, 121.24, 116.88 (t,  $^1J_{\text{C-F}} = 241.2$  Hz), 114.56, 111.40, 35.77 (t,  $^2J = 23.5$  Hz), 35.55, 30.91, 21.37 (t,  $^3J = 3.9$  Hz). IR: 3021, 2918, 1648, 1490, 1212, 1049, 972, 750  $\text{cm}^{-1}$ . HRMS (ESI) calcd. for  $\text{C}_{18}\text{H}_{18}\text{F}_2\text{NO}$   $[\text{M}+\text{H}]^+$  302.1356, found: 302.1360.

#### (E)-2-(1,1-difluoroundec-2-en-1-yl)benzo[d]oxazole (3m)

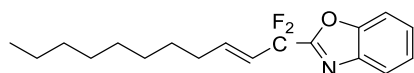

Yellow oil, 94%;  $^1\text{H}$  NMR (500 MHz,  $\text{CDCl}_3$ )  $\delta$  7.83 (dd,  $J = 7.9, 1.3$  Hz, 1H), 7.63-7.60 (m, 1H),

7.49-7.37 (m, 2H), 6.46-6.34 (m, 1H), 6.09-5.98 (m, 1H), 2.28-2.16 (m, 2H), 1.47 (p,  $J = 7.4$  Hz, 2H), 1.39-1.19 (m, 10H), 0.89 (t,  $J = 7.0$  Hz, 3H).  $^{19}\text{F}$  NMR (470 MHz,  $\text{CDCl}_3$ )  $\delta$  -94.32 (dd,  $J = 10.6, 2.8$  Hz).  $^{13}\text{C}$  NMR (125 MHz,  $\text{CDCl}_3$ )  $\delta$  158.2 (t,  $^2J_{\text{C-F}} = 36.4$  Hz), 150.6, 140.06, 139.8 (t,  $^3J_{\text{C-F}} = 7.7$  Hz), 126.6, 125.1, 121.6 (t,  $^2J_{\text{C-F}} = 25.0$  Hz), 121.2, 113.0 (t,  $^1J_{\text{C-F}} = 238.9$  Hz), 111.2, 31.9, 31.8, 29.3, 29.2, 29.1, 28.1, 22.6, 14.0. IR: 3032, 2926, 1676, 1457, 1228, 1040, 972, 749  $\text{cm}^{-1}$ . HRMS (ESI) calcd. for  $\text{C}_{18}\text{H}_{24}\text{F}_2\text{NO}$   $[\text{M}+\text{H}]^+$  308.1826, found: 308.1832.

**2-(1,1-difluoro-2-(4-phenylcyclohexylidene)ethyl)benzo[d]oxazole (3n)**

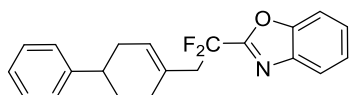

Light yellow solid, 95%, mp: 99-101  $^{\circ}\text{C}$ ;  $^1\text{H}$  NMR (500 MHz,  $\text{CDCl}_3$ )  $\delta$  7.87 (dd,  $J = 7.9, 1.1$  Hz, 1H), 7.67 (d,  $J = 7.9$  Hz, 1H), 7.50 (td,  $J = 7.6, 1.3$  Hz, 1H), 7.46 (td,  $J = 7.6, 1.3$  Hz, 1H), 7.34-7.28 (m, 2H), 7.25-7.19 (m, 3H), 5.77 (s, 1H), 3.18 (t,  $J = 17.0$  Hz, 2H), 2.84-2.69 (m, 1H), 2.39-2.26 (m, 2H), 2.25-2.10 (m, 2H), 2.00-1.93 (m, 1H), 1.87-1.73 (m, 1H).  $^{19}\text{F}$  NMR (470 MHz,  $\text{CDCl}_3$ )  $\delta$  -96.75 (td,  $J = 17.0, 3.4$  Hz).  $^{13}\text{C}$  NMR (125 MHz,  $\text{CDCl}_3$ )  $\delta$  158.3 (t,  $^2J_{\text{C-F}} = 33.9$  Hz), 150.6, 146.6, 140.1, 128.4, 128.3 (t,  $^3J_{\text{C-F}} = 2.8$  Hz), 126.8, 126.7, 126.1, 125.3, 121.3, 116.4 (t,  $^1J_{\text{C-F}} = 243.8$  Hz), 111.4, 44.0 (t,  $^2J_{\text{C-F}} = 23.7$  Hz), 39.4, 33.6, 30.0, 29.9. IR: 3026, 2918, 1609, 1489, 1445, 1198, 1022, 754  $\text{cm}^{-1}$ . HRMS (ESI) calcd. for  $\text{C}_{21}\text{H}_{20}\text{F}_2\text{NO}$   $[\text{M}+\text{H}]^+$  340.1513, found: 340.1515.

**(E)-2-(1,1-difluoro-7-(naphthalen-2-yloxy)hept-2-en-1-yl)benzo[d]oxazole (3o)**

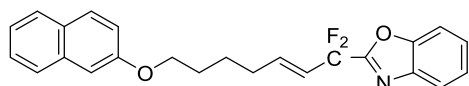

Light yellow solid, 52%, mp: 70-72  $^{\circ}\text{C}$ ;  $^1\text{H}$  NMR (500 MHz,  $\text{CDCl}_3$ )  $\delta$  7.87 (d,  $J = 7.4$  Hz, 1H), 7.83-7.73 (m, 3H), 7.65 (d,  $J = 7.7$  Hz, 1H), 7.52-7.42 (m, 3H), 7.37 (t,  $J = 7.4$  Hz, 1H), 7.22-7.12 (m, 2H), 6.48 (dt,  $J = 15.7, 6.8$  Hz, 1H), 6.13 (dt,  $J = 15.7, 10.7$  Hz, 1H), 4.12 (t,  $J = 6.4$  Hz, 2H), 2.39-2.33 (m, 2H), 1.93 (m, 2H), 1.75 (m, 2H).  $^{19}\text{F}$  NMR (470 MHz,  $\text{CDCl}_3$ )  $\delta$  -94.79 (dd,  $J = 10.8, 2.1$  Hz).  $^{13}\text{C}$  NMR (125 MHz,  $\text{CDCl}_3$ )  $\delta$  158.2 (t,  $^2J_{\text{C-F}} = 36.0$  Hz), 157.0, 150.7, 140.1, 139.4 (t,  $^3J_{\text{C-F}} = 8.5$  Hz), 134.6, 129.4, 129.0, 127.7, 126.8, 126.8, 126.4, 125.3, 123.6, 122.1 (t,  $^2J_{\text{C-F}} = 25.0$  Hz), 121.3, 119.0, 113.1 (t,  $^1J_{\text{C-F}} = 238.7$  Hz), 111.4, 106.6, 67.5, 31.7, 28.7, 24.9. IR: 3024, 2939, 1625, 1508, 1176, 1132, 1059, 970, 750  $\text{cm}^{-1}$ . HRMS (ESI) calcd. for  $\text{C}_{24}\text{H}_{22}\text{F}_2\text{NO}_2$   $[\text{M}+\text{H}]^+$  394.1619, found: 394.1621.

**(E)-2-(1,1-difluoro-5-(p-tolyloxy)pent-2-en-1-yl)benzo[d]oxazole (3p)**

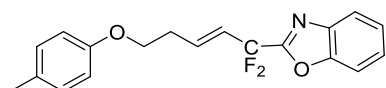

Yellow oil, 44%;  $^1\text{H}$  NMR (500 MHz,  $\text{CDCl}_3$ )  $\delta$  7.87 (d,  $J = 8.0$  Hz, 1H), 7.65 (d,  $J = 7.9$  Hz, 1H), 7.49 (td,  $J = 7.8, 1.4$  Hz, 1H), 7.45 (td,  $J = 7.8, 1.4$  Hz, 1H), 7.11 (d,  $J = 8.6$  Hz, 2H), 6.84-6.82 (m, 2H), 6.54 (dt,  $J = 15.8, 6.8, 2.3$  Hz, 1H), 6.22 (dt,  $J = 15.8, 10.6$  Hz, 1H), 4.09 (t,  $J = 6.4$  Hz, 2H), 2.87-2.61 (m, 2H), 2.32 (s, 3H).  $^{19}\text{F}$  NMR (470 MHz,  $\text{CDCl}_3$ )  $\delta$  -94.90 (d,  $J = 10.6$  Hz).  $^{13}\text{C}$  NMR (125 MHz,  $\text{CDCl}_3$ )  $\delta$  158.0 (t,  $^2J_{\text{C-F}} = 35.7$  Hz), 156.5, 150.7, 140.0, 135.7 (t,  $^3J_{\text{C-F}} = 8.8$  Hz), 130.2, 129.9, 126.9, 125.3, 123.8 (t,  $^2J_{\text{C-F}} = 25.0$  Hz), 121.3, 114.5, 112.9 (t,  $^1J_{\text{C-F}} = 239.3$  Hz), 111.4, 66.2, 31.9, 20.5. IR: 3024, 2924, 1681, 1513, 1237, 1039, 968, 745  $\text{cm}^{-1}$ . HRMS (ESI) calcd. for  $\text{C}_{19}\text{H}_{18}\text{F}_2\text{NO}_2$   $[\text{M}+\text{H}]^+$  330.1306, found: 330.1311.

**2-[1,1-Difluoro-2-(6-methyl-chroman-4-yl)-ethyl]-benzoxazole (4p)**

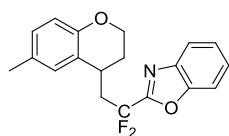

Yellow oil, 14%;  $^1\text{H}$  NMR (500 MHz,  $\text{CDCl}_3$ )  $\delta$  7.87 (d,  $J = 8.0$  Hz, 1H), 7.67 (d,  $J = 7.9$  Hz, 1H), 7.51 (td, 1H), 7.47 (td,  $J = 7.4, 1.1$  Hz, 1H), 7.01 (s, 1H), 6.93 (dd,  $J = 8.3, 1.5$  Hz, 1H), 6.74 (d,  $J = 8.3$  Hz, 1H), 4.26-4.15 (m, 2H), 3.42-3.30 (m, 1H), 3.01 (dtd,  $J = 22.3, 15.8, 2.9$  Hz, 1H), 2.74 (m, 1H), 2.27 (s, 3H), 2.26-2.19 (m, 1H), 2.11-2.00 (m, 1H).  $^{19}\text{F}$  NMR (470 MHz,  $\text{CDCl}_3$ )  $\delta$  -94.22 (ddd,  $J = 276.2, 22.4, 10.9$  Hz), -98.61 (ddd,  $J = 276.1, 21.2, 16.4$  Hz).  $^{13}\text{C}$  NMR (125 MHz,  $\text{CDCl}_3$ )  $\delta$  157.9 (t,  $^2J_{\text{C-F}} = 33.6$  Hz), 152.4, 150.6, 139.9, 129.7, 129.3, 128.7, 127.0, 125.4, 123.9, 121.3, 116.9, 116.8 (t,  $^1J_{\text{C-F}} = 242.9$  Hz), 111.4, 62.9, 42.6 (t,  $^2J_{\text{C-F}} = 22.3$  Hz), 28.2 (t,  $^3J_{\text{C-F}} = 2.7$  Hz), 27.8, 20.6. IR: 3012, 2929, 1691, 1502, 1229, 1098, 1046, 745  $\text{cm}^{-1}$ . HRMS (ESI) calcd. for  $\text{C}_{19}\text{H}_{18}\text{F}_2\text{NO}_2$   $[\text{M}+\text{H}]^+$  330.1306, found: 330.1310.

**(E)-2-(1,1-difluoro-4-(p-tolyloxy)but-2-en-1-yl)benzo[d]oxazole (3q)**

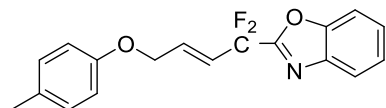

Light yellow solid, 35%, mp: 76-78 $^{\circ}\text{C}$ ;  $^1\text{H}$  NMR (500 MHz,  $\text{CDCl}_3$ )  $\delta$  7.86 (dd,  $J = 8.0, 1.1$  Hz, 1H), 7.66 (d,  $J = 8.1$  Hz, 1H), 7.50 (td,  $J = 7.5, 1.3$  Hz, 1H), 7.45 (td,  $J = 7.7, 1.2$  Hz, 1H), 7.15-7.10 (m, 2H), 6.90-6.83 (m, 2H), 6.68-6.60 (m, 1H), 6.49 (dt,  $J = 15.8, 10.4, 1.5$  Hz, 1H), 4.78-4.56 (m, 2H), 2.32 (s, 3H).  $^{19}\text{F}$  NMR (470 MHz,  $\text{CDCl}_3$ )  $\delta$  -95.52 (dd,  $J = 10.4, 3.1$  Hz).  $^{13}\text{C}$  NMR (125 MHz,  $\text{CDCl}_3$ )  $\delta$  157.6 (t,  $^2J_{\text{C-F}} = 35.4$  Hz), 156.0, 150.7, 140.0, 134.2 (t,  $^3J_{\text{C-F}} = 8.5$  Hz), 130.7, 130.0, 126.9, 125.4, 122.7 (t,  $^2J_{\text{C-F}} = 25.5$  Hz), 121.3, 114.6, 112.9 (t,  $^1J_{\text{C-F}} = 239.7$  Hz), 111.4, 66.3, 20.5. IR: 3025, 2918, 1609, 1488, 1197, 1058, 1022, 936, 755  $\text{cm}^{-1}$ . HRMS (ESI) calcd. for  $\text{C}_{18}\text{H}_{16}\text{F}_2\text{NO}_2$   $[\text{M}+\text{H}]^+$  316.1149, found: 316.1152.

**(E)-6-(benzo[d]oxazol-2-yl)-6,6-difluorohex-4-en-1-yl 4-iodobenzoate (3r)**

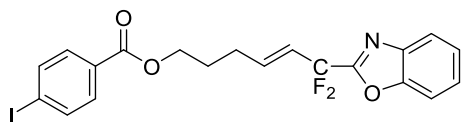

Yellow oil, 96%;  $^1\text{H}$  NMR (500 MHz,  $\text{CDCl}_3$ )  $\delta$  7.80 (d,  $J = 8.0$  Hz, 1H), 7.78–7.68 (m, 4H), 7.59 (d,  $J = 8.1$  Hz, 1H), 7.43 (t,  $J = 7.3$  Hz, 1H), 7.40 (t,  $J = 7.5$  Hz, 1H), 6.45 (dt,  $J = 15.8, 6.8, 2.4$  Hz, 1H), 6.11 (dt,  $J = 15.8, 10.6$  Hz, 1H), 4.35 (t,  $J = 6.3$  Hz, 2H), 2.43 – 2.33 (m, 2H), 2.01 – 1.92 (m, 2H).  $^{19}\text{F}$  NMR (470 MHz,  $\text{CDCl}_3$ )  $\delta$  -94.28 (dd,  $J = 10.6, 2.4$  Hz).  $^{13}\text{C}$  NMR (125 MHz,  $\text{CDCl}_3$ )  $\delta$  166.0, 158.0 (t,  $^2J_{\text{C-F}} = 35.7$  Hz), 150.6, 139.9, 138.3 (t,  $^3J_{\text{C-F}} = 8.6$  Hz), 137.7, 131.7, 131.0, 129.6, 126.9, 125.3, 122.5 (t,  $^2J_{\text{C-F}} = 24.9$  Hz), 121.3, 112.8 (t,  $^1J_{\text{C-F}} = 238.8$  Hz), 111.4, 100.8, 64.4, 28.6, 27.3. IR: 3015, 2954, 1720, 1678, 1583, 1182, 1040, 972, 751  $\text{cm}^{-1}$ . HRMS (ESI) calcd. for  $\text{C}_{20}\text{H}_{17}\text{F}_2\text{INO}_3$   $[\text{M}+\text{H}]^+$  484.0221, found: 484.0225.

### 2-(benzo[d]oxazol-2-yl)-3-methylbut-2-en-1-yl 4-bromobenzoate (3s)

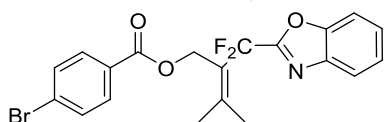

Yellow oil, 46%;  $^1\text{H}$  NMR (500 MHz,  $\text{CDCl}_3$ )  $\delta$  7.84 (s, 1H), 7.82 (s, 1H), 7.78 (d,  $J = 7.2$  Hz, 1H), 7.53–7.47 (m, 3H), 7.46–7.36 (m, 2H), 5.18 (s, 2H), 2.08 (s, 3H), 1.94 (s, 3H).  $^{19}\text{F}$  NMR (470 MHz,  $\text{CDCl}_3$ )  $\delta$  -90.94 (s).  $^{13}\text{C}$  NMR (125 MHz,  $\text{CDCl}_3$ )  $\delta$  165.6, 158.66 (t,  $^2J_{\text{C-F}} = 36.7$  Hz), 150.6, 149.0 (t,  $^3J_{\text{C-F}} = 4.9$  Hz), 140.0, 131.6, 131.2, 129.0, 128.0, 126.8, 125.3, 122.7 (t,  $^2J_{\text{C-F}} = 24.0$  Hz), 121.3, 114.8 (t,  $^1J_{\text{C-F}} = 244.6$  Hz), 111.3, 60.6 (t,  $^3J_{\text{C-F}} = 4.5$  Hz), 22.9, 22.4 (t,  $^4J_{\text{C-F}} = 2.7$  Hz). IR: 3027, 2924, 1723, 1659, 1514, 1271, 1182, 1097, 751, 697  $\text{cm}^{-1}$ . HRMS (ESI) calcd. for  $\text{C}_{20}\text{H}_{17}\text{BrF}_2\text{NO}_3$   $[\text{M}+\text{H}]^+$  436.0360, found: 436.0358.

### (E)-p-tolyl 4-(benzo[d]oxazol-2-yl)-4,4-difluoro-2-methylbut-2-enoate (3t)

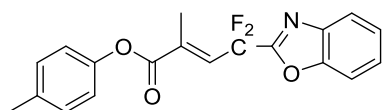

Yellow oil, 51%;  $^1\text{H}$  NMR (500 MHz,  $\text{CDCl}_3$ )  $\delta$  7.89 (d,  $J = 8.0$  Hz, 1H), 7.68 (d,  $J = 8.1$  Hz, 1H), 7.53 (td,  $J = 7.8, 1.2$  Hz, 1H), 7.48 (td,  $J = 7.8, 1.1$  Hz, 1H), 7.37 (td,  $J = 13.0, 1.3$  Hz, 1H), 7.23 (d,  $J = 8.3$  Hz, 2H), 7.10–7.04 (m, 2H), 2.39 (s, 3H), 2.25 (dd,  $J = 4.4, 2.9$  Hz, 3H).  $^{19}\text{F}$  NMR (470 MHz,  $\text{CDCl}_3$ )  $\delta$  -91.97 (d,  $J = 13.0$  Hz).  $^{13}\text{C}$  NMR (125 MHz,  $\text{CDCl}_3$ )  $\delta$  165.2, 157.1 (t,  $^2J_{\text{C-F}} = 33.9$  Hz), 150.8, 148.4, 139.9, 138.4 (t,  $^3J_{\text{C-F}} = 5.8$  Hz), 135.9, 131.0 (t,  $^2J_{\text{C-F}} = 27.1$  Hz), 130.1, 127.2, 125.5, 121.5, 121.1, 113.0 (t,  $^1J_{\text{C-F}} = 241.2$  Hz), 111.5, 20.9, 14.1. IR: 3019, 2927, 1741, 1659, 1510, 1192, 1038, 985, 745  $\text{cm}^{-1}$ . HRMS (ESI) calcd. for  $\text{C}_{19}\text{H}_{16}\text{F}_2\text{NO}_3$   $[\text{M}+\text{H}]^+$  344.1098, found: 344.1101.

### 3-(2-(benzo[d]oxazol-2-yl)-2,2-difluoroethyl)-1,3-dimethylindolin-2-one (4u)

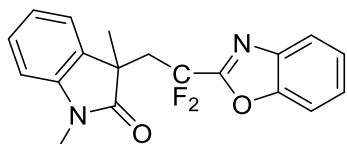

Light yellow solid, 96%, mp: 167-168°C;  $^1\text{H}$  NMR (500 MHz,  $\text{CDCl}_3$ )  $\delta$  7.66 (d,  $J = 7.3$  Hz, 1H), 7.47 (d,  $J = 7.7$  Hz, 1H), 7.39 (dd,  $J = 7.4, 1.2$  Hz, 1H), 7.35 (dd,  $J = 7.5, 1.1$  Hz, 1H), 7.04 (td,  $J = 7.7, 1.1$  Hz, 1H), 6.95 (d,  $J = 7.3$  Hz, 1H), 6.77 (d,  $J = 7.8$  Hz, 1H), 6.57 (td,  $J = 7.5, 0.8$  Hz, 1H), 3.25 (td,  $J = 15.5, 11.5$  Hz, 1H), 3.19 (s, 3H), 3.09 (dt,  $J = 20.9, 14.3$  Hz, 1H), 1.42 (s, 3H).  $^{19}\text{F}$  NMR (470 MHz,  $\text{CDCl}_3$ )  $\delta$  -90.46 (dt,  $J = 277.6, 12.4$  Hz), -101.16 (ddd,  $J = 277.6, 20.9, 16.4$  Hz).  $^{13}\text{C}$  NMR (125 MHz,  $\text{CDCl}_3$ )  $\delta$  178.7, 157.3 (t,  $^2J_{\text{C-F}} = 33.5$  Hz), 150.4, 142.9, 139.9, 130.6, 128.1, 126.6, 125.1, 123.2, 121.9, 121.0, 115.4 (t,  $^1J_{\text{C-F}} = 244.6$  Hz), 111.2, 108.3, 44.6, 43.1 (t,  $^2J_{\text{C-F}} = 24.1$  Hz), 26.4, 25.6. IR: 3021, 2928, 1708, 1610, 1483, 1190, 1047, 748  $\text{cm}^{-1}$ . HRMS (ESI) calcd. for  $\text{C}_{19}\text{H}_{17}\text{F}_2\text{N}_2\text{O}_2$   $[\text{M}+\text{H}]^+$  343.1258, found: 343.1261.

### 2-(benzofuran-3-ylidifluoromethyl)benzo[d]oxazole (3v)

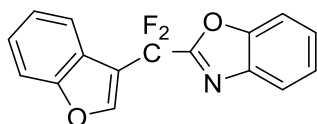

Light yellow solid, 48%, mp: 97-99°C;  $^1\text{H}$  NMR (500 MHz,  $\text{CDCl}_3$ )  $\delta$  7.89 (dd,  $J = 7.4, 0.9$  Hz, 1H), 7.70 (d,  $J = 7.8$  Hz, 1H), 7.67 (d,  $J = 8.0$  Hz, 1H), 7.58 (dd,  $J = 8.3, 0.8$  Hz, 1H), 7.51 (m, 1H), 7.46 (m, 1H), 7.44-7.40 (m, 1H), 7.36-7.31 (m, 2H).  $^{19}\text{F}$  NMR (470 MHz,  $\text{CDCl}_3$ )  $\delta$  -96.10 (d,  $J = 4.6$  Hz).  $^{13}\text{C}$  NMR (125 MHz,  $\text{CDCl}_3$ )  $\delta$  156.4 (t,  $^2J_{\text{C-F}} = 34.8$  Hz), 155.6, 150.8, 146.7 (t,  $^2J_{\text{C-F}} = 33.8$  Hz), 140.1, 127.2, 126.6, 126.51, 125.5, 123.8, 122.4, 121.6, 112.1, 111.5, 109.9 (t,  $^1J_{\text{C-F}} = 240.8$  Hz), 108.6 (t,  $^3J_{\text{C-F}} = 3.7$  Hz). IR: 3015, 1609, 1447, 1158, 1004, 750  $\text{cm}^{-1}$ . HRMS (ESI) calcd. for  $\text{C}_{16}\text{H}_{10}\text{F}_2\text{NO}_2$   $[\text{M}+\text{H}]^+$  286.0680, found: 286.0677.

### (E)-2-(1,1-difluoro-3-phenylallyl)-5-methylbenzo[d]oxazole (3w)

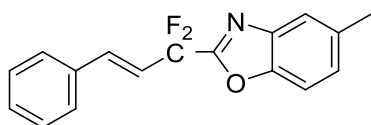

Light yellow solid, 85%, mp: 71-73°C;  $^1\text{H}$  NMR (500 MHz,  $\text{CDCl}_3$ )  $\delta$  7.64 (s, 1H), 7.55-7.49 (m, 3H), 7.44-7.34 (m, 3H), 7.29 (d,  $J = 8.1$  Hz, 1H), 7.22 (d,  $J = 16.1$  Hz, 1H), 6.67 (dt,  $J = 16.1, 10.8$  Hz, 1H), 2.52 (s, 3H).  $^{19}\text{F}$  NMR (470 MHz,  $\text{CDCl}_3$ )  $\delta$  -94.44 (d,  $J = 10.7$  Hz).  $^{13}\text{C}$  NMR (125 MHz,  $\text{CDCl}_3$ )  $\delta$  158.1 (t,  $^2J_{\text{C-F}} = 35.7$  Hz), 149.0, 140.3, 136.7 (t,  $^3J_{\text{C-F}} = 8.9$  Hz), 135.3, 134.1, 129.7, 128.8, 128.1, 127.6, 121.0, 119.6 (t,  $^2J_{\text{C-F}} = 25.3$  Hz), 113.5 (t,  $^1J_{\text{C-F}} = 239.4$  Hz), 110.8, 21.5. IR: 3010, 1661, 1612, 1453, 1214, 1067, 979  $\text{cm}^{-1}$ . HRMS (ESI) calcd. for  $\text{C}_{17}\text{H}_{14}\text{F}_2\text{NO}$   $[\text{M}+\text{H}]^+$  286.1043, found: 286.1047.

**(E)-2-(1,1-difluoro-3-phenylallyl)benzo[d]thiazole (3x)**

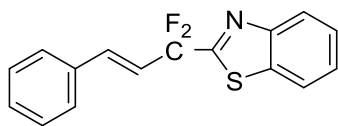

Yellow oil, 49%;  $^1\text{H}$  NMR (500 MHz,  $\text{CDCl}_3$ )  $\delta$  8.18 (d,  $J = 8.3$  Hz, 1H), 7.99 (d,  $J = 8.0$  Hz, 1H), 7.59 (m, 1H), 7.55-7.49 (m, 3H), 7.43-7.36 (m, 3H), 7.21 (dt,  $J = 16.1, 2.5$  Hz, 1H), 6.75 (dt,  $J = 16.1, 11.0$  Hz, 1H).  $^{19}\text{F}$  NMR (470 MHz,  $\text{CDCl}_3$ )  $\delta$  -86.68 (dd,  $J = 11.0, 2.5$  Hz).  $^{13}\text{C}$  NMR (125 MHz,  $\text{CDCl}_3$ )  $\delta$  164.6 (t,  $^2J_{\text{C-F}} = 36.4$  Hz), 152.8, 135.9 (t,  $^3J_{\text{C-F}} = 9.3$  Hz), 135.0, 134.4, 129.5, 128.8, 127.6, 126.8, 126.6, 124.4, 122.0, 120.9 (t,  $^2J_{\text{C-F}} = 26.2$  Hz), 116.6 (t,  $^1J_{\text{C-F}} = 239.9$  Hz). IR: 3011, 1647, 1598, 1436, 1186, 1029, 974, 741  $\text{cm}^{-1}$ . HRMS (ESI) calcd. for  $\text{C}_{16}\text{H}_{12}\text{F}_2\text{NS}$   $[\text{M}+\text{H}]^+$  288.0659, found: 288.0663.

**(E)-2-(1,1-difluoroundec-2-en-1-yl)-5-methylbenzo[d]oxazole (3y)**

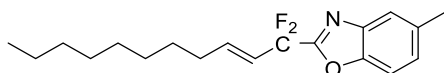

Yellow oil, 90%;  $^1\text{H}$  NMR (500 MHz,  $\text{CDCl}_3$ )  $\delta$  7.61 (s, 1H), 7.48 (d,  $J = 8.5$  Hz, 1H), 7.26 (dd,  $J = 8.5, 1.2$  Hz, 1H), 6.39 (dt,  $J = 15.7, 6.9, 2.5$  Hz, 1H), 6.02 (dt,  $J = 15.7, 10.6, 1.5$  Hz, 1H), 2.50 (s, 3H), 2.27-2.18 (m, 2H), 1.52-1.43 (m, 2H), 1.37-1.23 (m, 10H), 0.90 (t,  $J = 7.0$  Hz, 3H).  $^{19}\text{F}$  NMR (470 MHz,  $\text{CDCl}_3$ )  $\delta$  -94.23 (dd,  $J = 10.6, 2.9$  Hz).  $^{13}\text{C}$  NMR (125 MHz,  $\text{CDCl}_3$ )  $\delta$  158.3 (t,  $^2J_{\text{C-F}} = 35.7$  Hz), 148.93, 140.3, 139.9 (t,  $^3J_{\text{C-F}} = 8.6$  Hz), 135.2, 127.9, 121.7 (t,  $^2J_{\text{C-F}} = 25.1$  Hz), 121.0, 113.1 (t,  $^1J_{\text{C-F}} = 238.8$  Hz), 110.7, 31.9, 31.8, 29.3, 29.2, 29.1, 28.1, 22.7, 21.43, 14.1. IR: 3018, 2930, 1679, 1461, 1232, 1044, 975, 953  $\text{cm}^{-1}$ . HRMS (ESI) calcd. for  $\text{C}_{19}\text{H}_{26}\text{F}_2\text{NO}$   $[\text{M}+\text{H}]^+$  322.1982, found: 322.1986.



## 7. Copies of $^1\text{H}$ NMR, $^{19}\text{F}$ NMR, $^{13}\text{C}$ NMR spectra of product 3, 4

### (*E*)-2-(1,1-difluoro-3-phenylallyl)benzo[*d*]oxazole (3a)

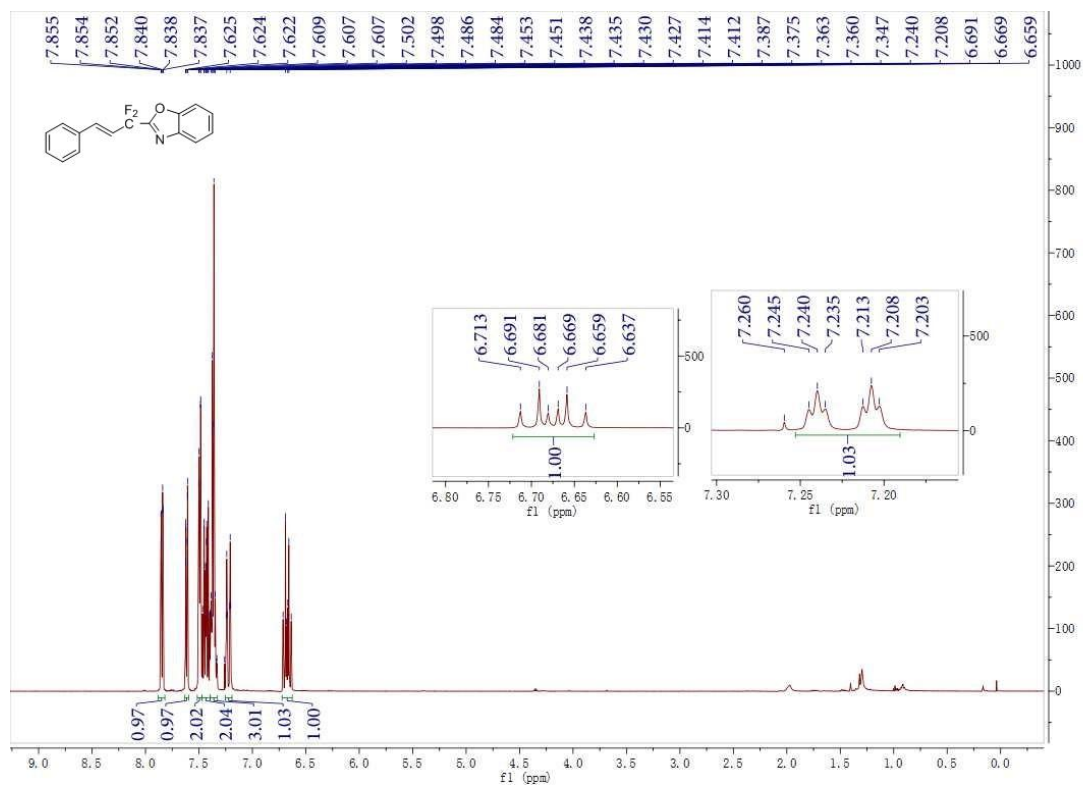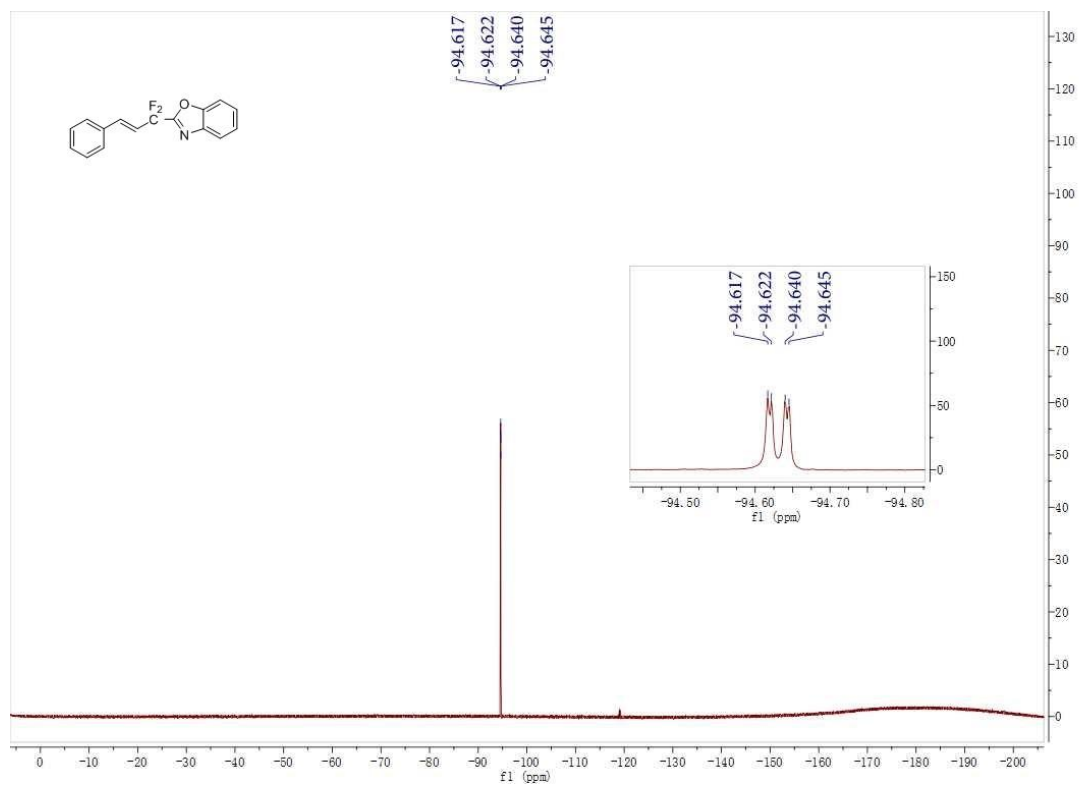

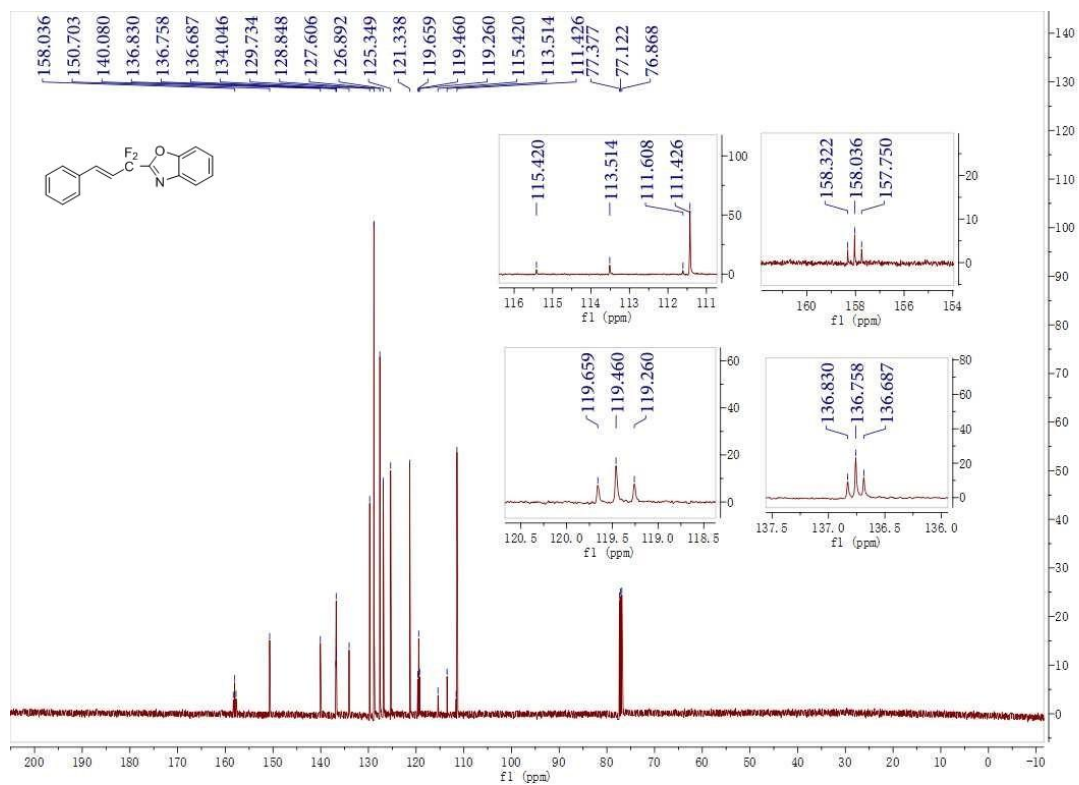

**2,2'-(2-benzylidene-1,3,3-tetrafluoropropane-1,3-diyl)bis(benzo[d]oxazole) (3a'')**

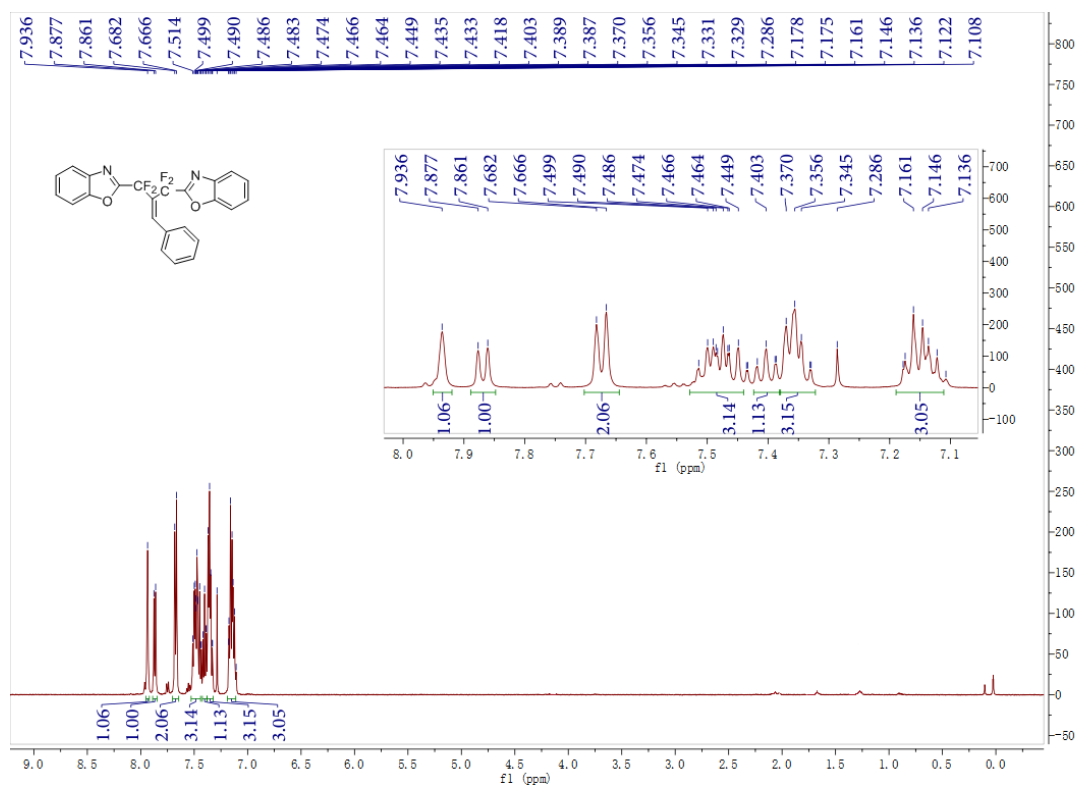

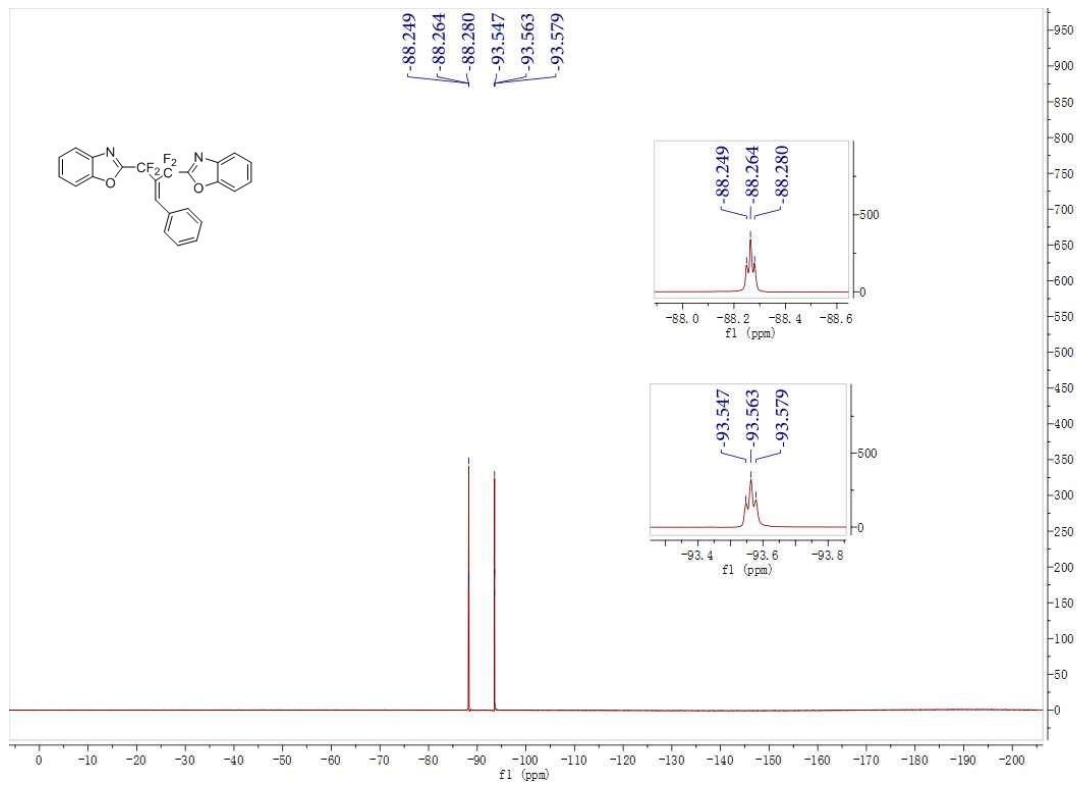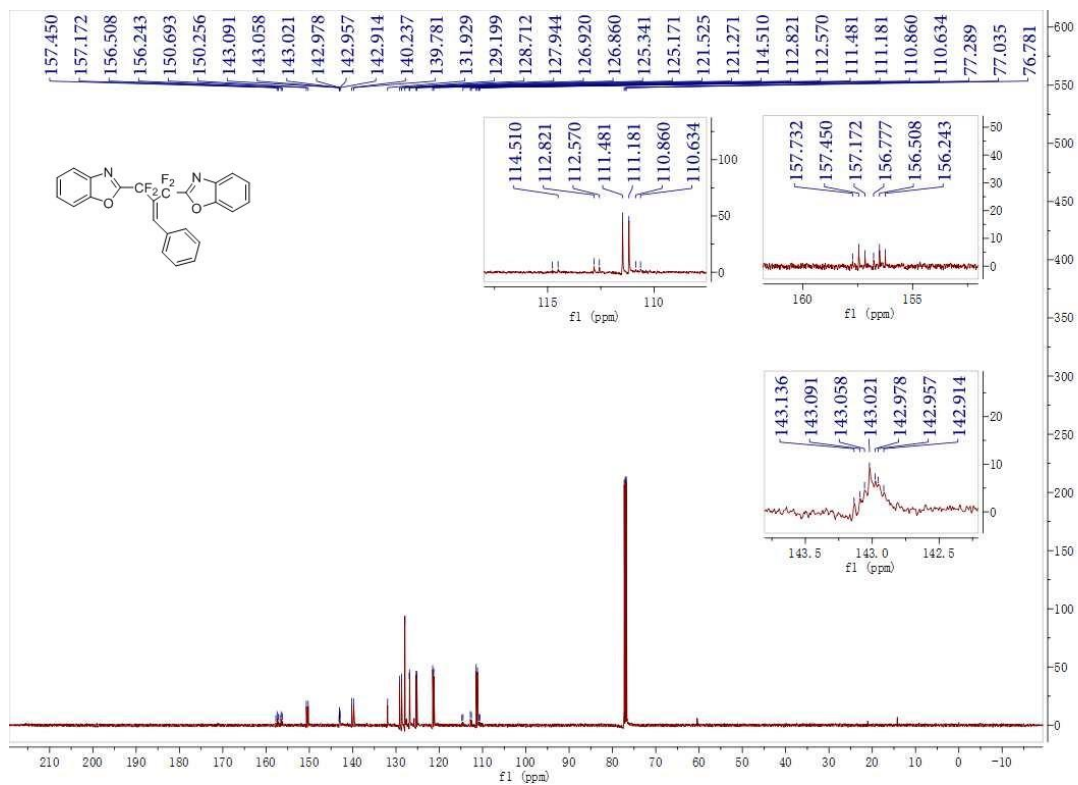

## 2-(benzo[d]oxazol-2-yl difluoromethyl)-5-methyl-3-phenyl-1H-inden-1-one (4)

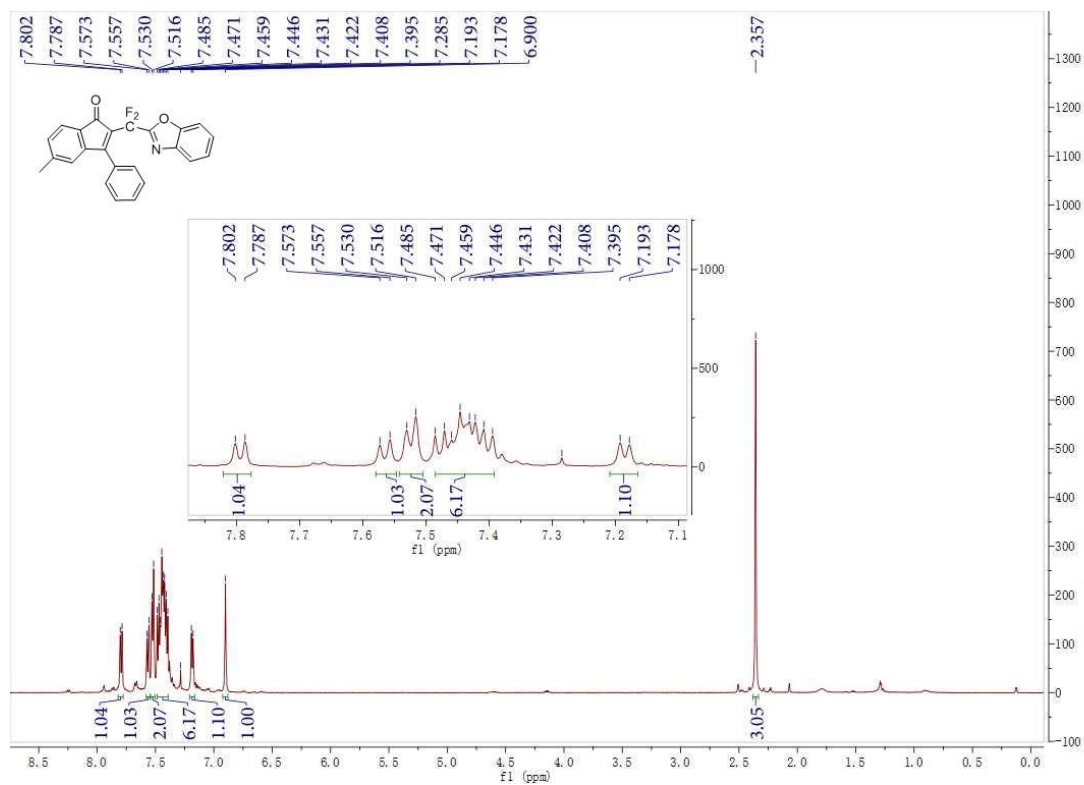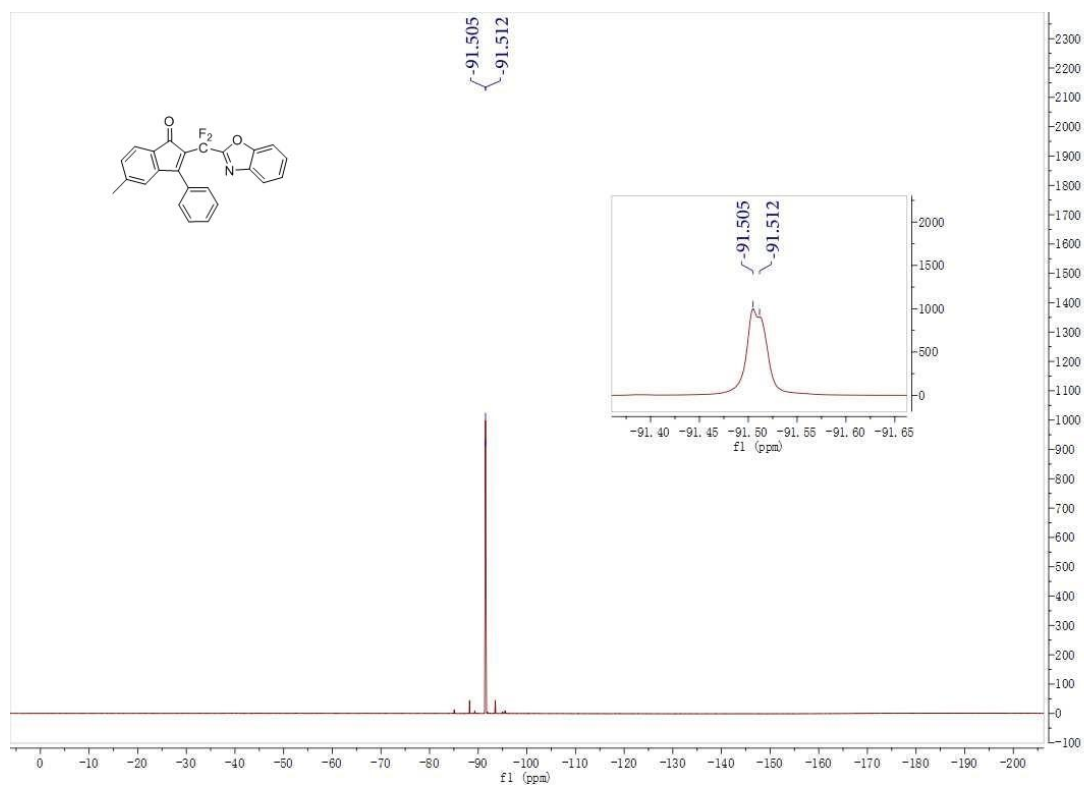

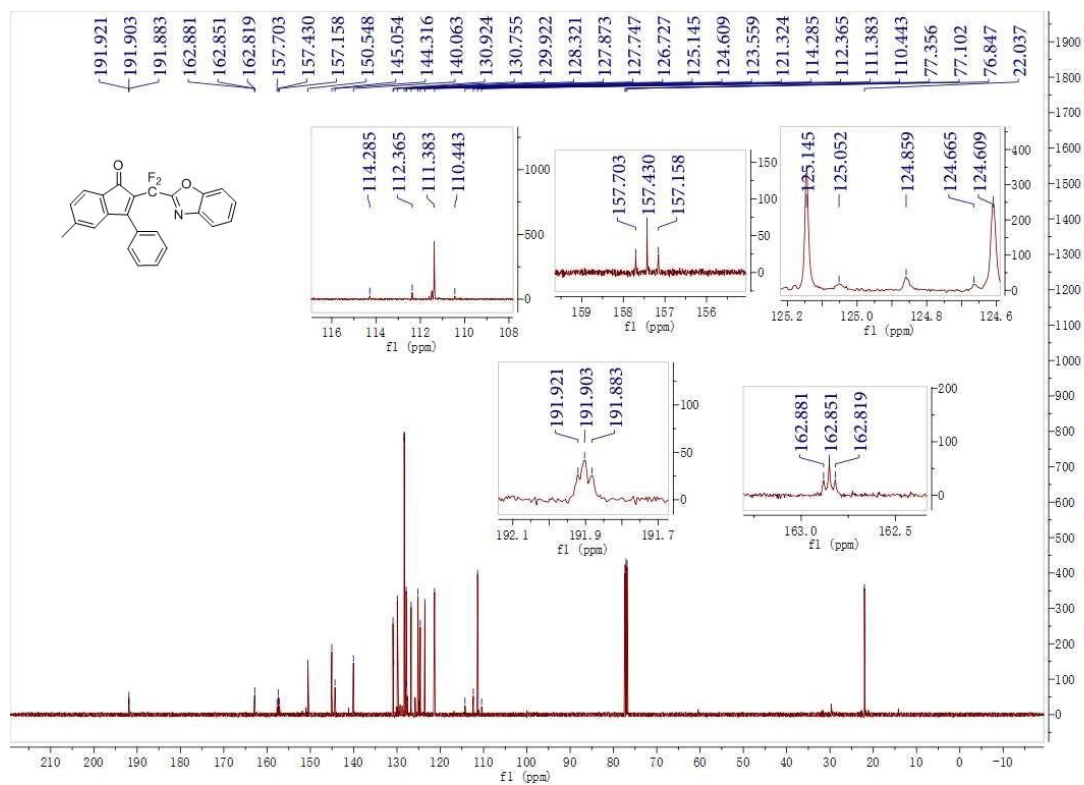

**(E)-2-(1,1-difluoro-3-(p-tolyl)allyl)benzo[d]oxazole (3b)**

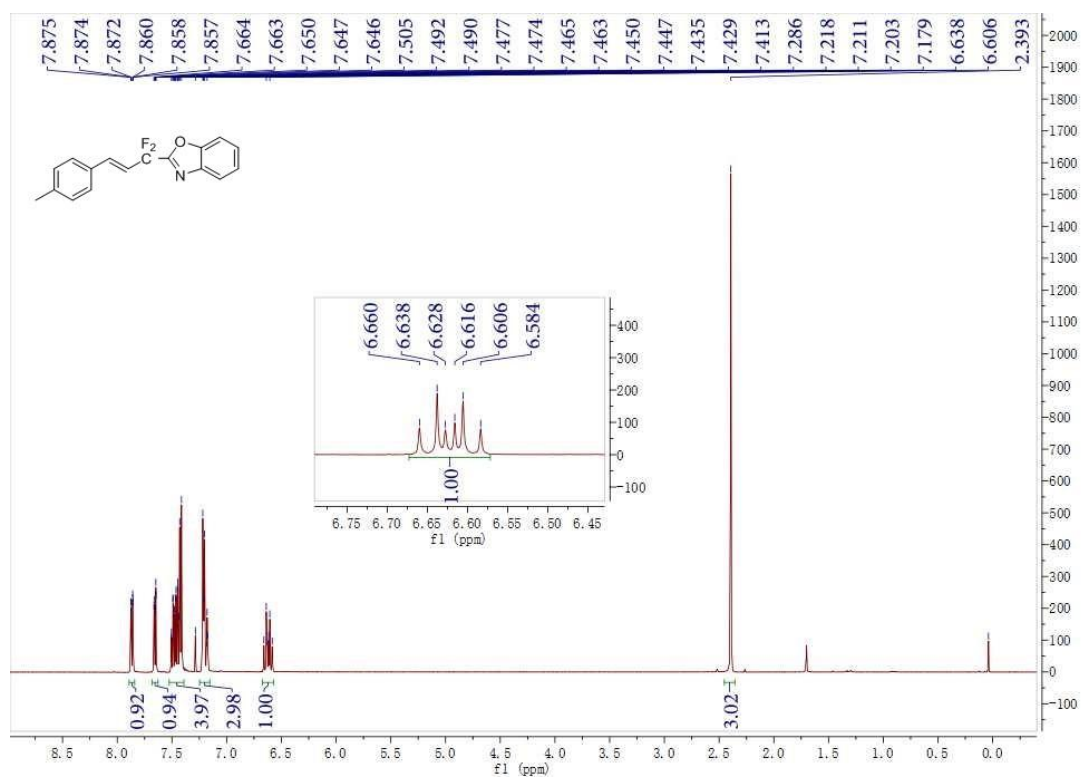

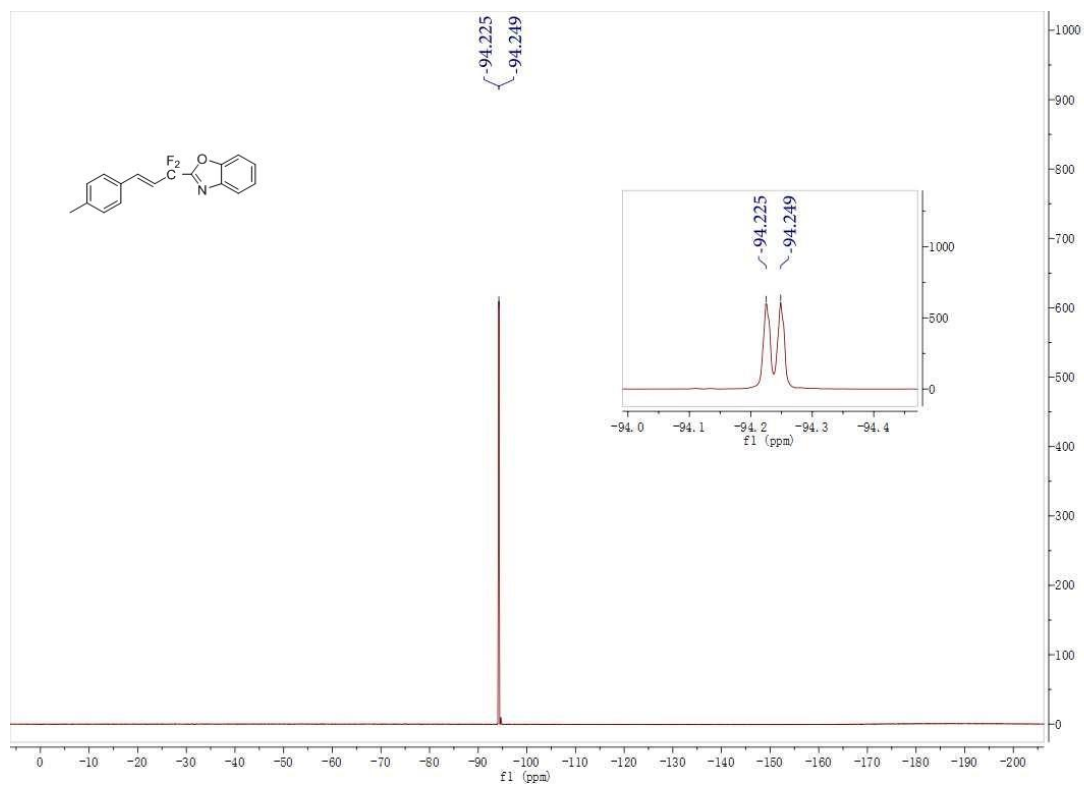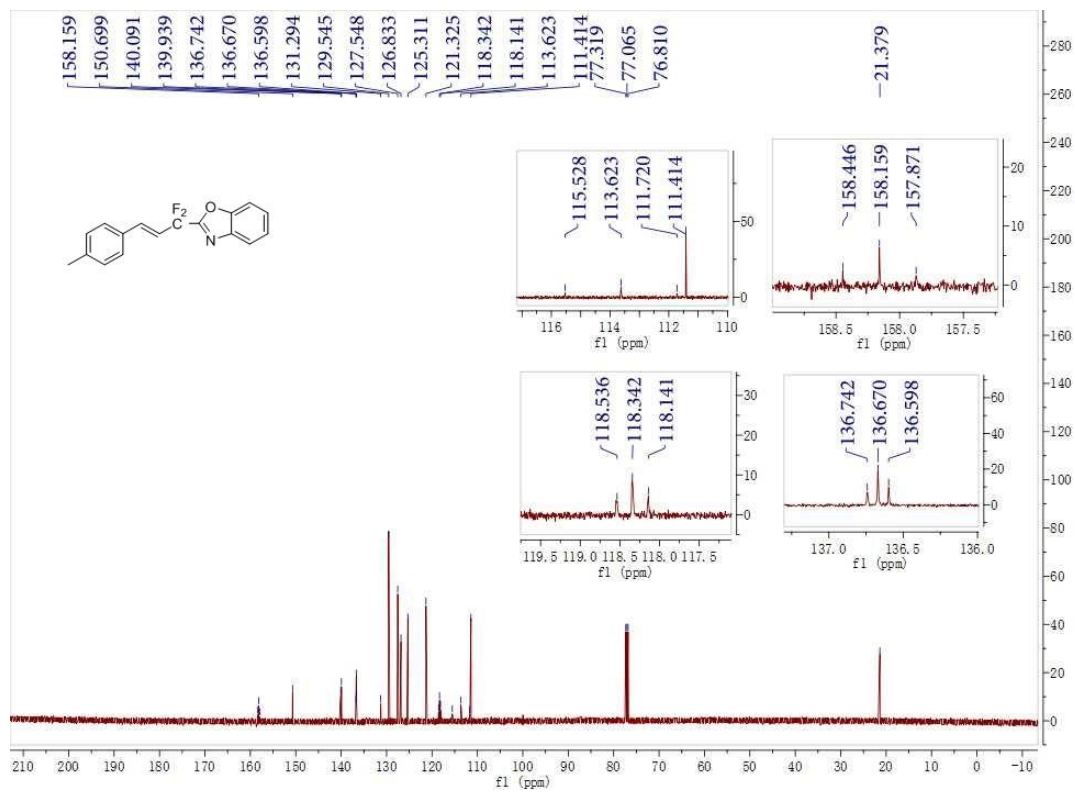

**(E)-2-(1,1-difluoro-3-(4-methoxyphenyl)allyl)benzo[d]oxazole (3c)**

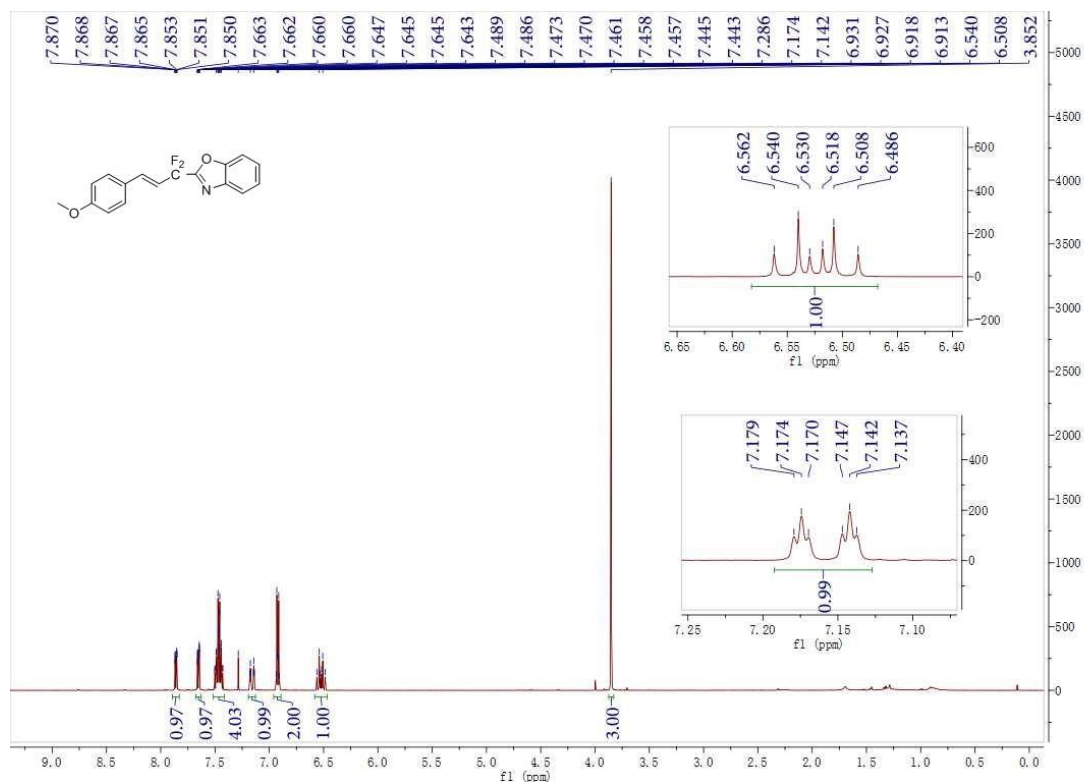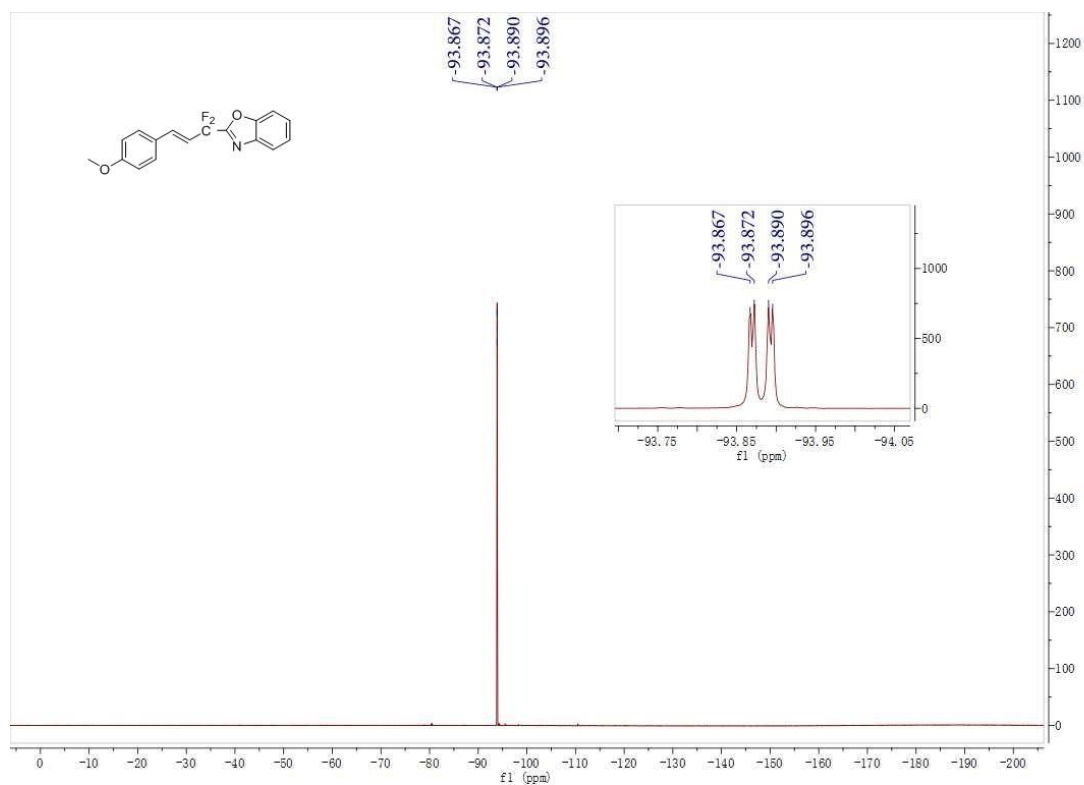



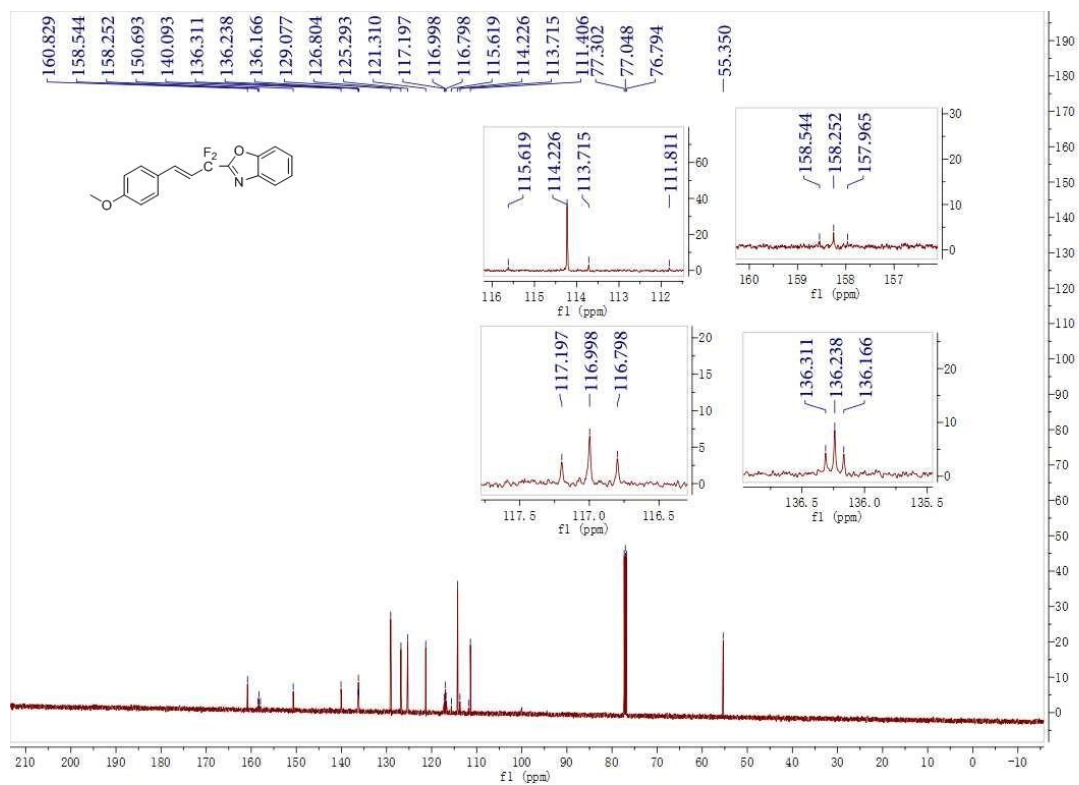

**(E)-2-(3-(4-chlorophenyl)-1,1-difluoroallyl)benzo[d]oxazole (3d)**

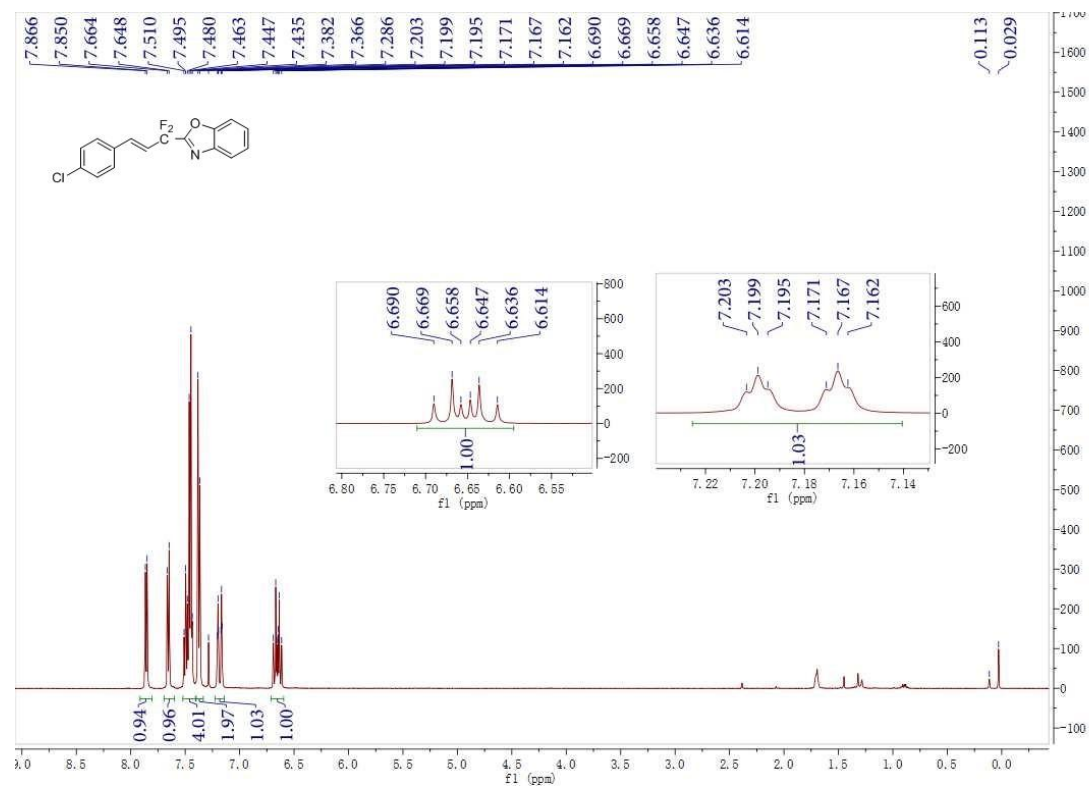



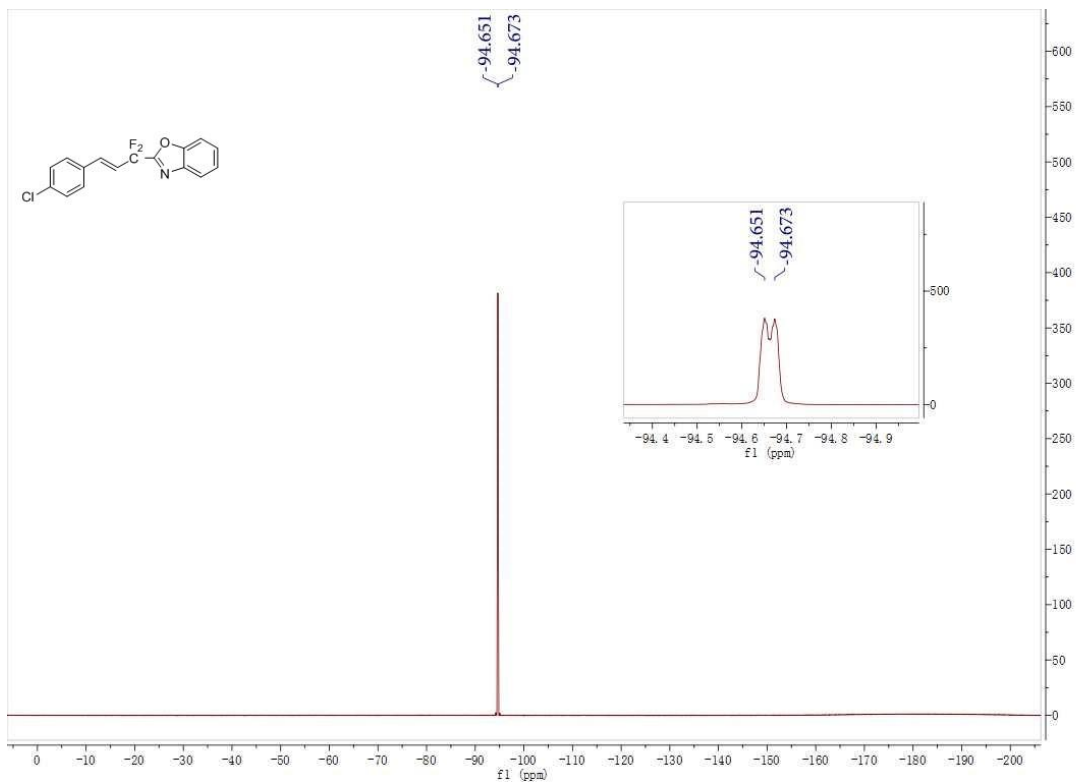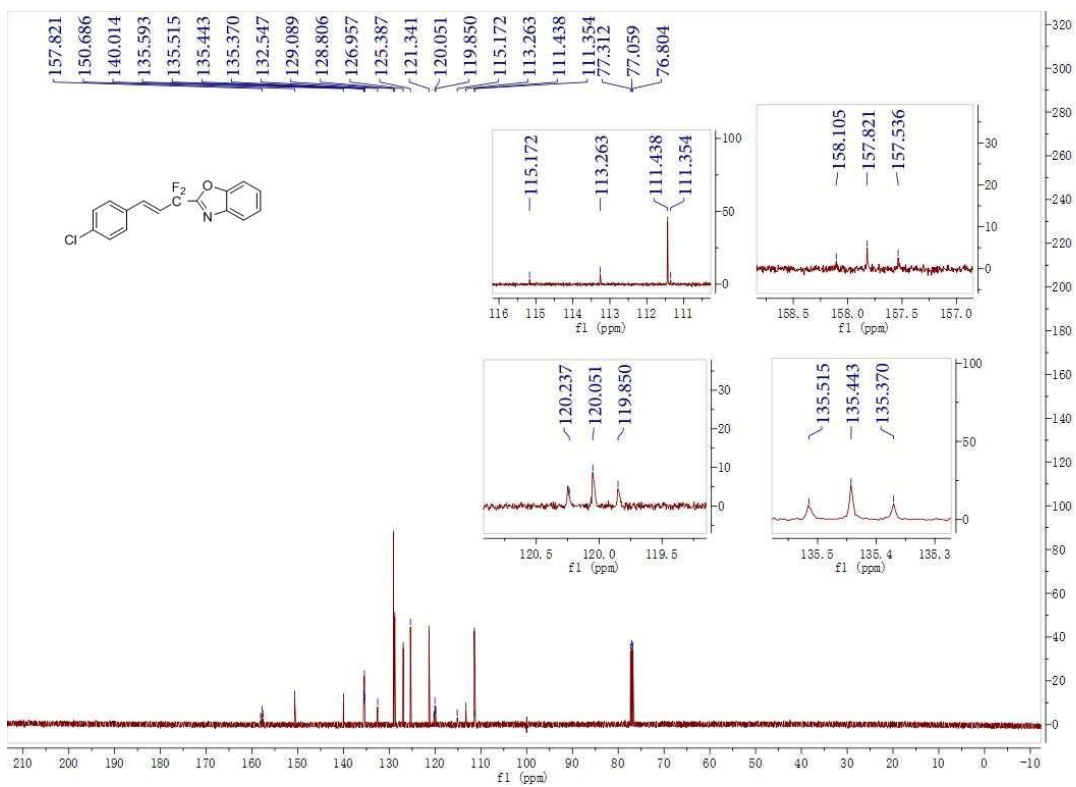

**(E)-2-(1,1-difluoro-3-(4-fluorophenyl)allyl)benzo[d]oxazole (3c)**

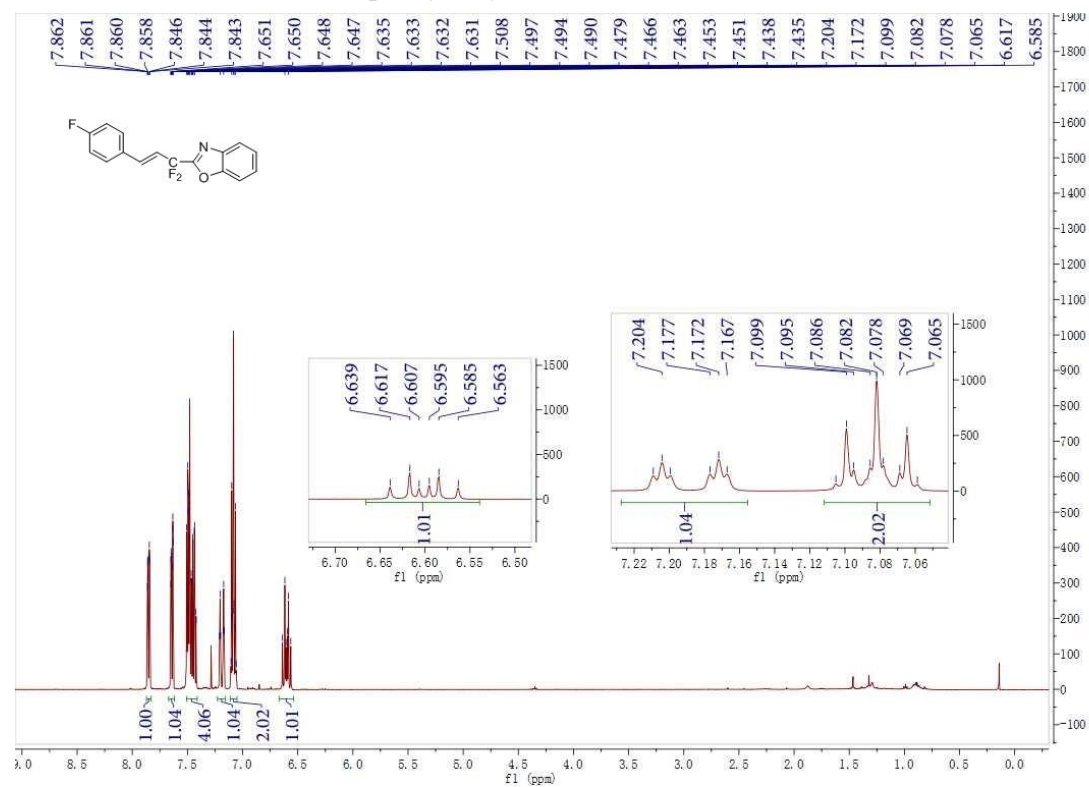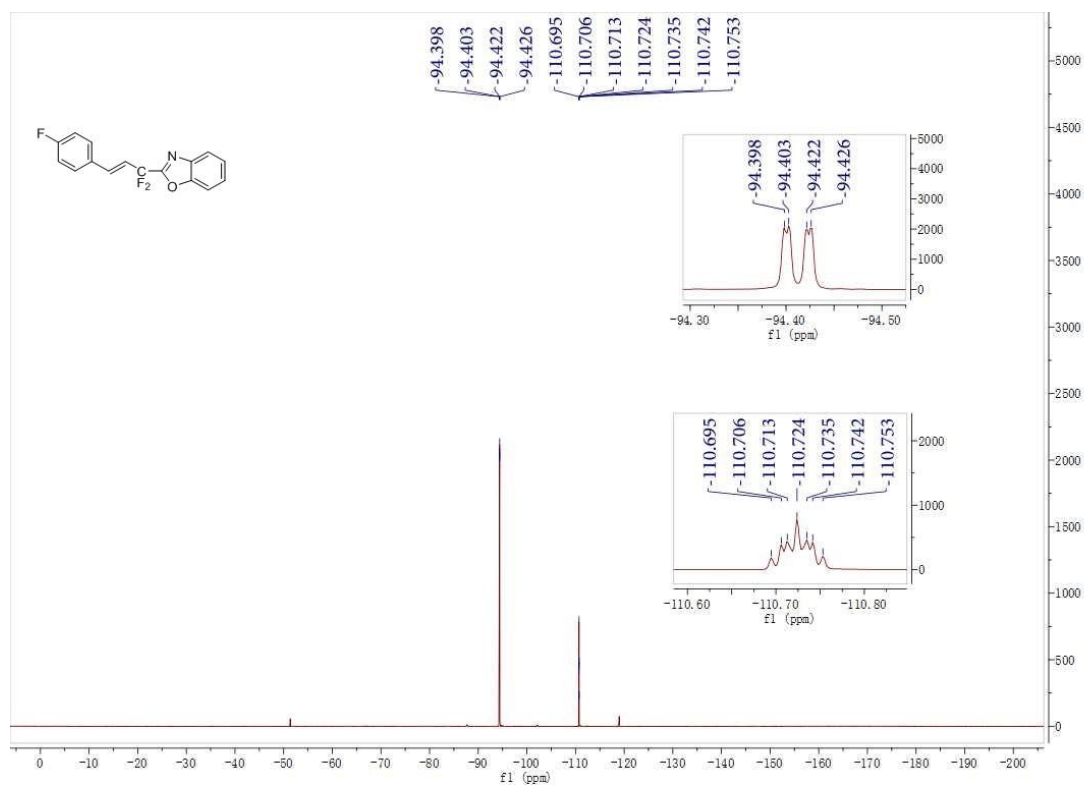

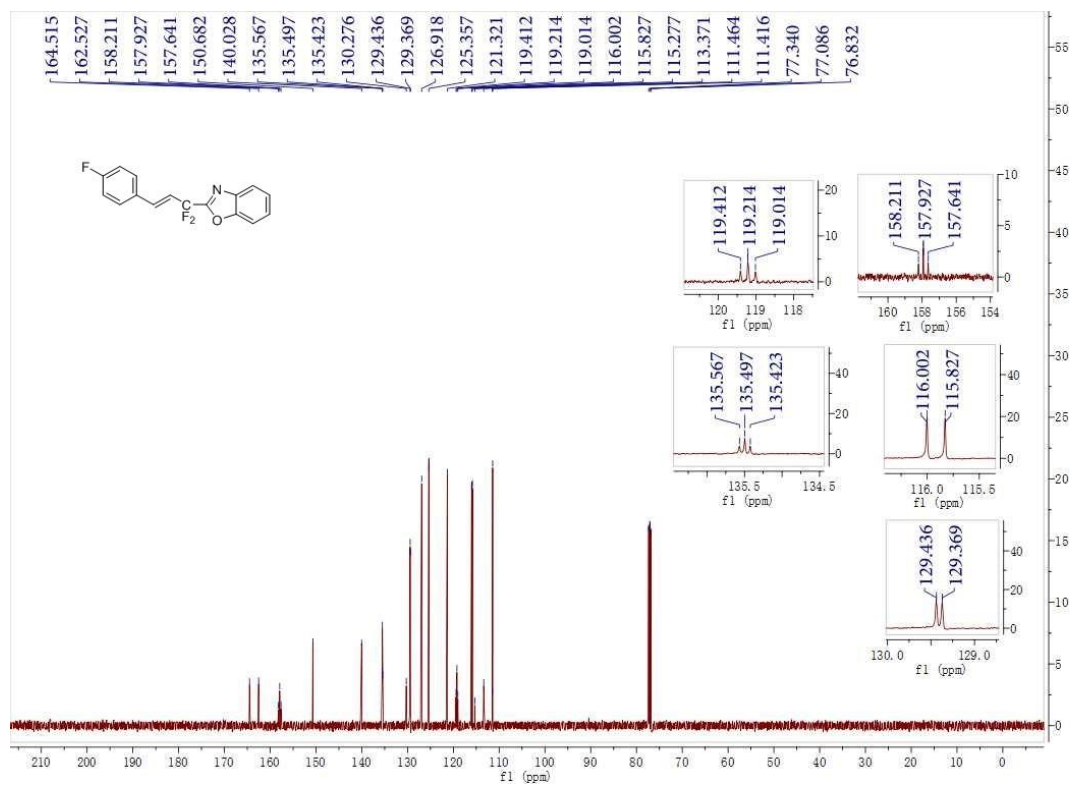

**(E)-2-(1,1-difluoro-3-(4-nitrophenyl)allyl)benzo[d]oxazole (3f)**

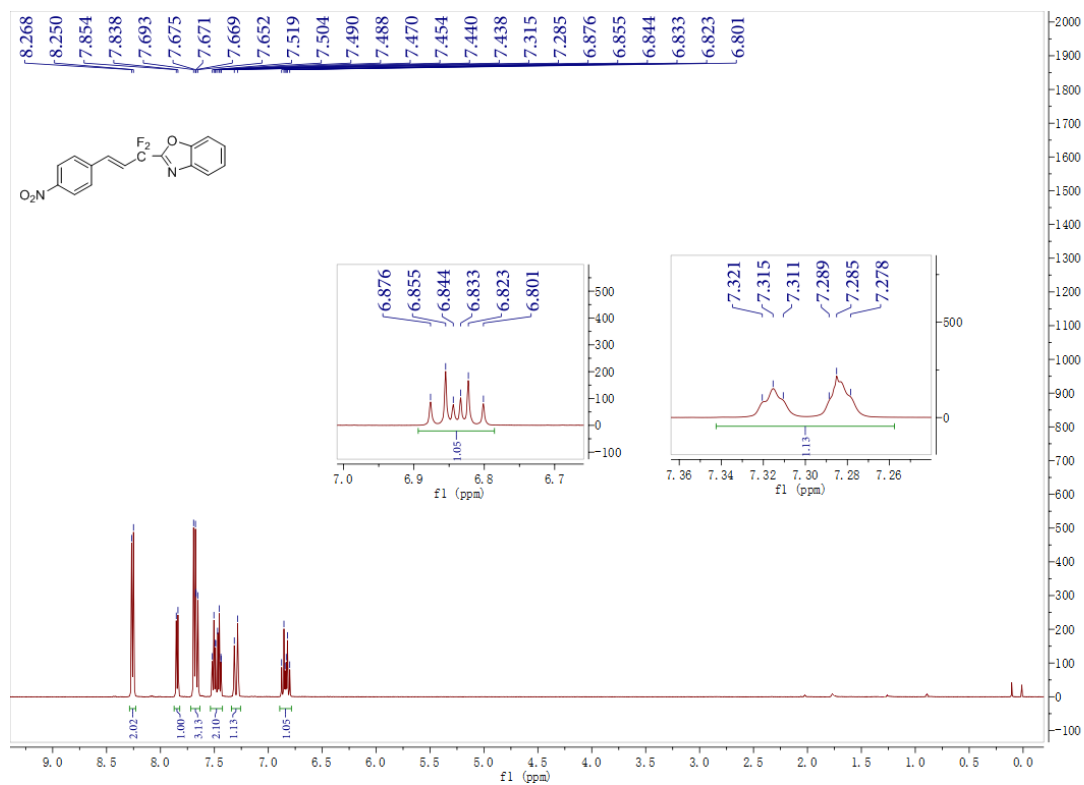

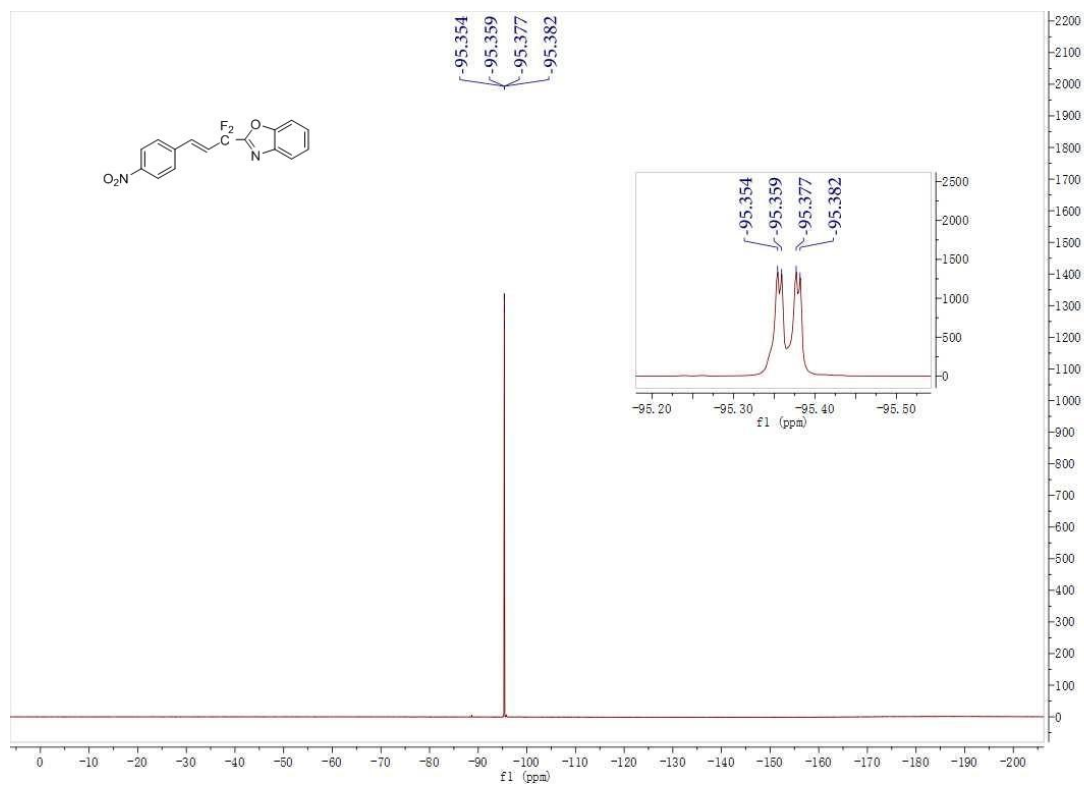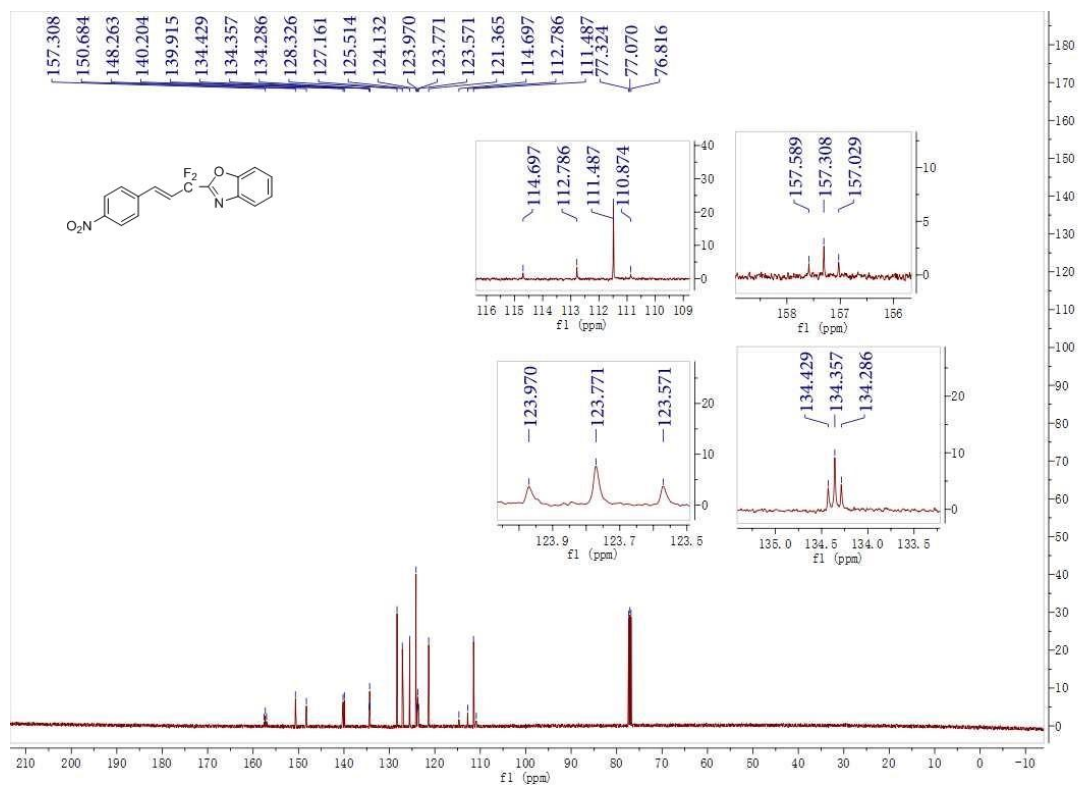

**(E)-2-(3-(2-bromophenyl)-1,1-difluoroallyl)benzo[d]oxazole (3g)**

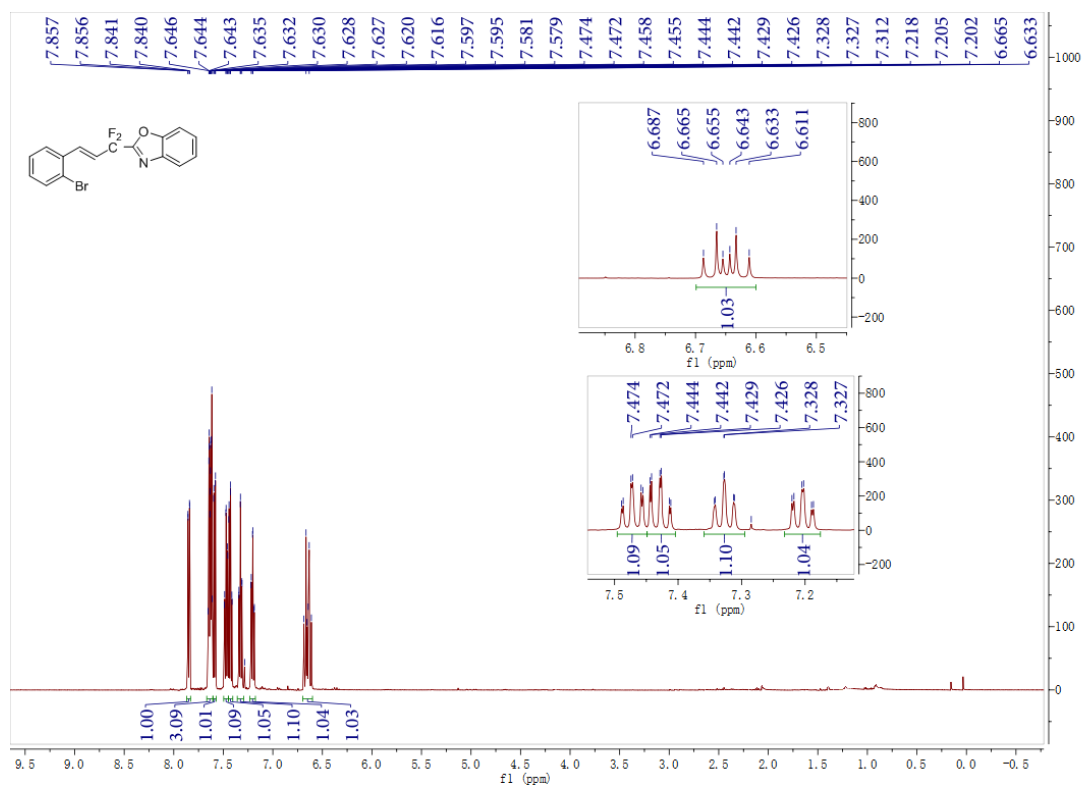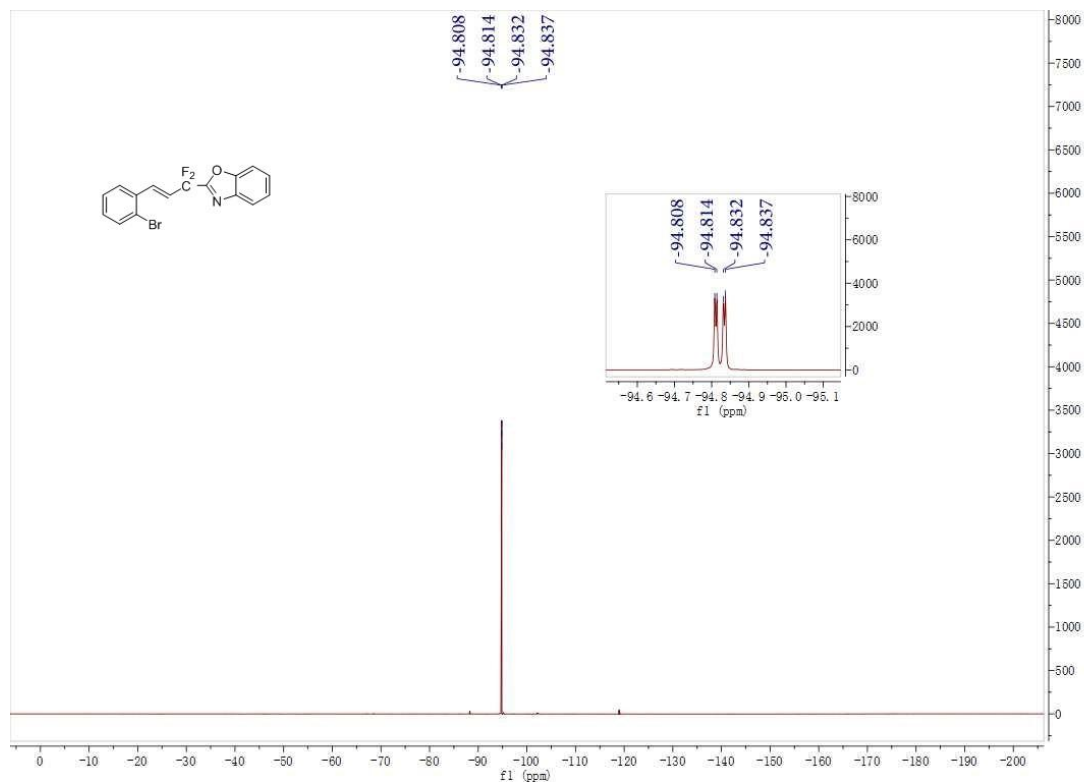

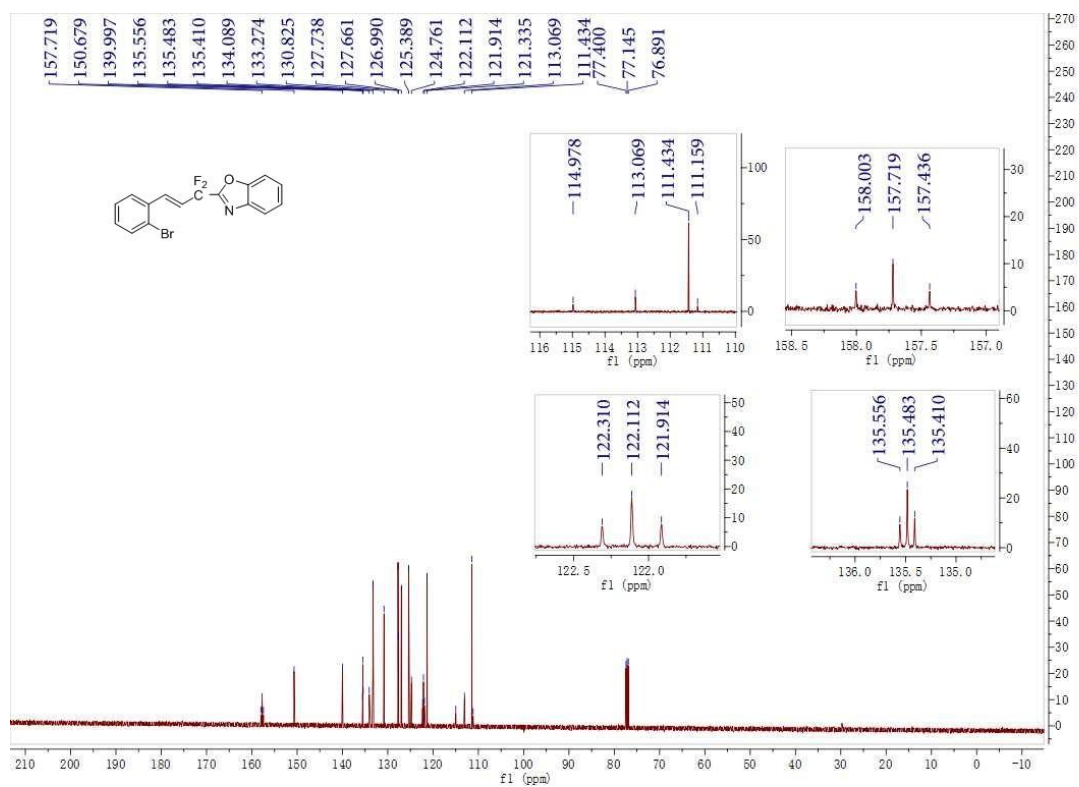

**(E)-2-(3-(3-bromophenyl)-1,1-difluoroallyl)benzo[d]oxazole (3h)**

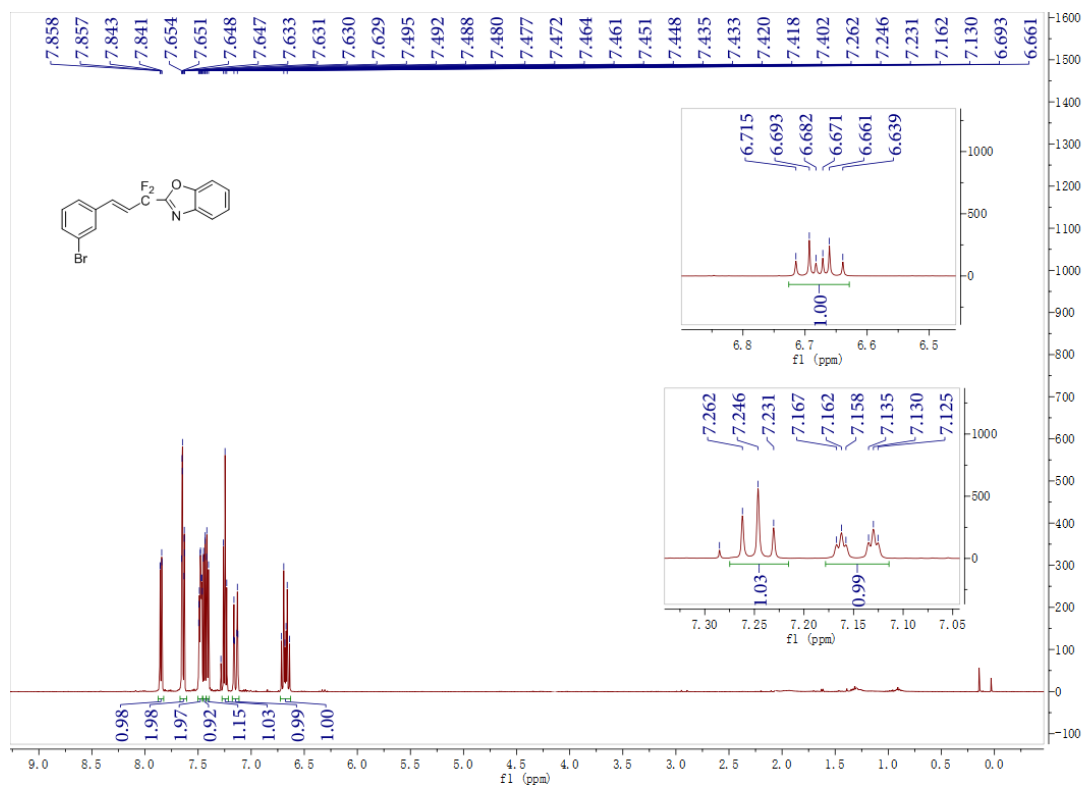

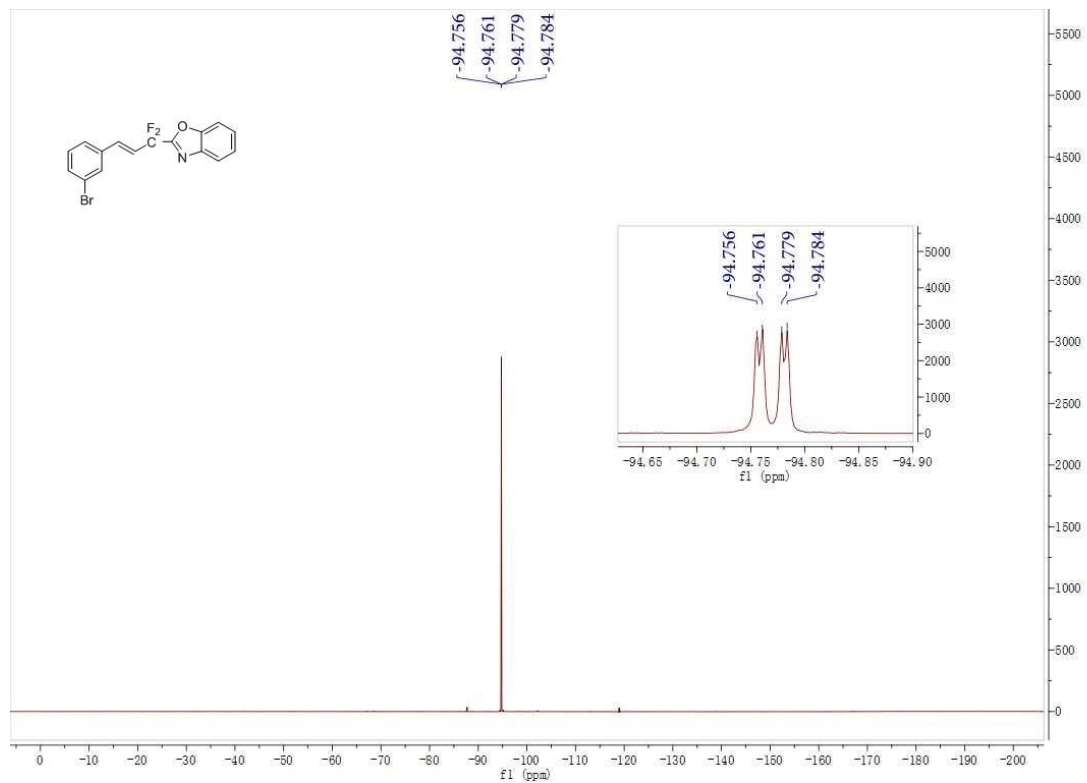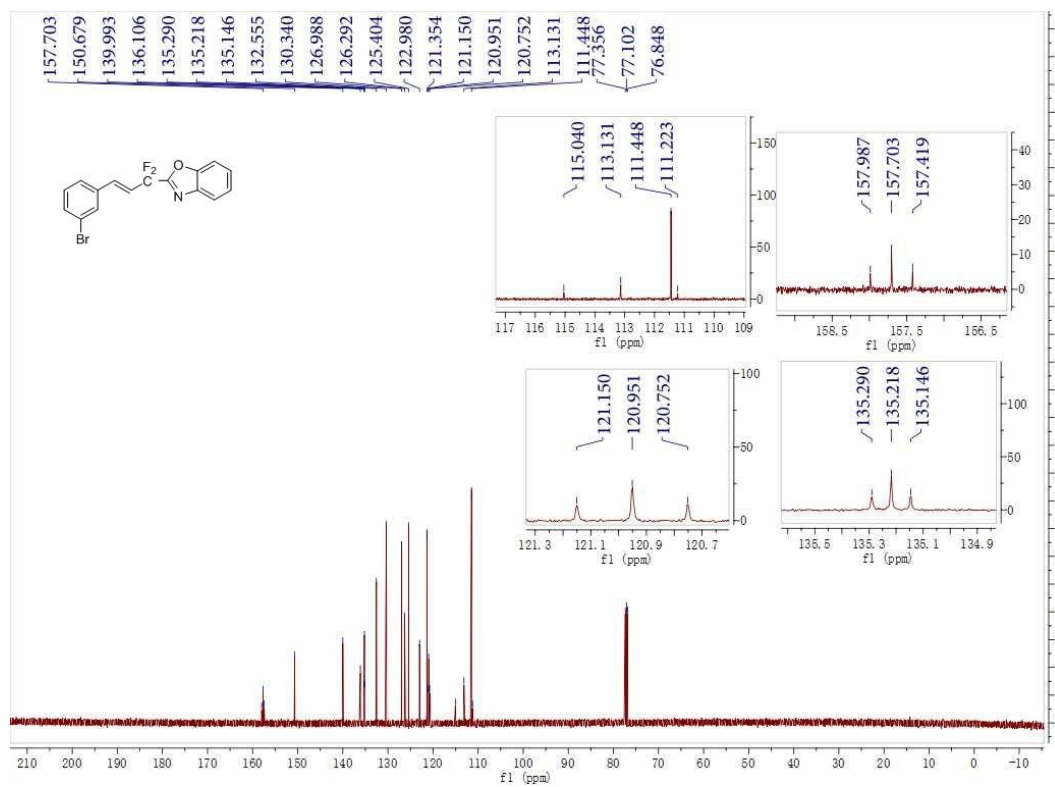



**(E)-2-(3-(4-bromophenyl)-1,1-difluoroallyl)benzo[d]oxazole (3i)**

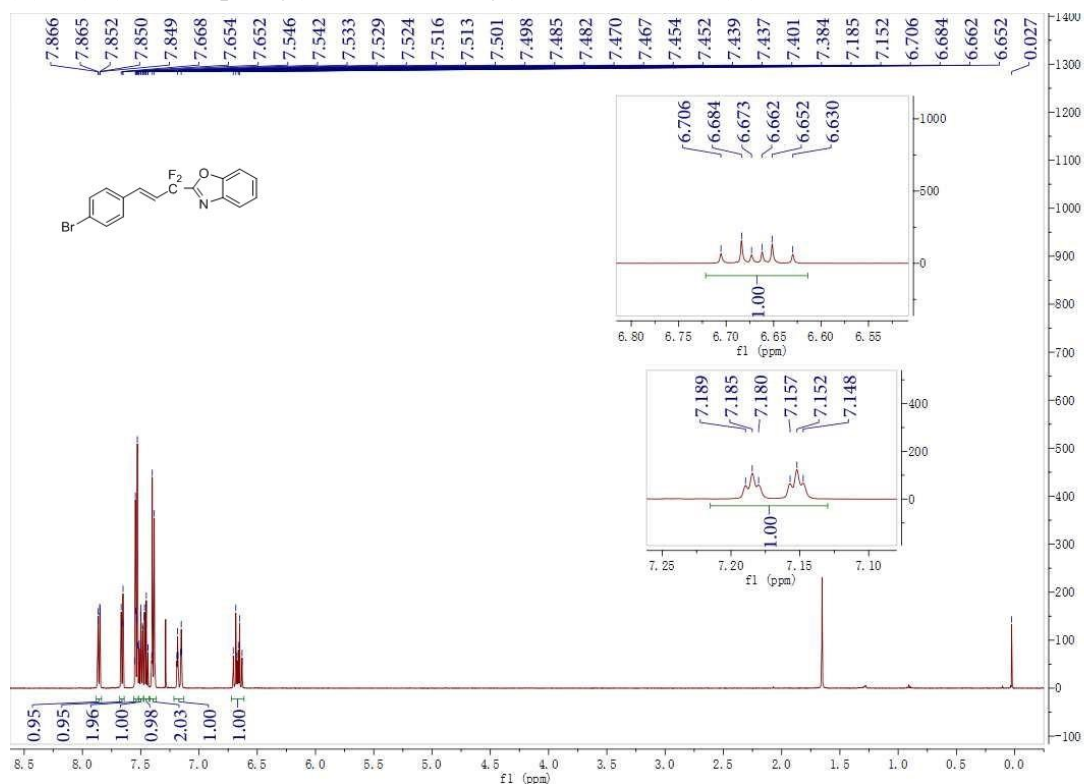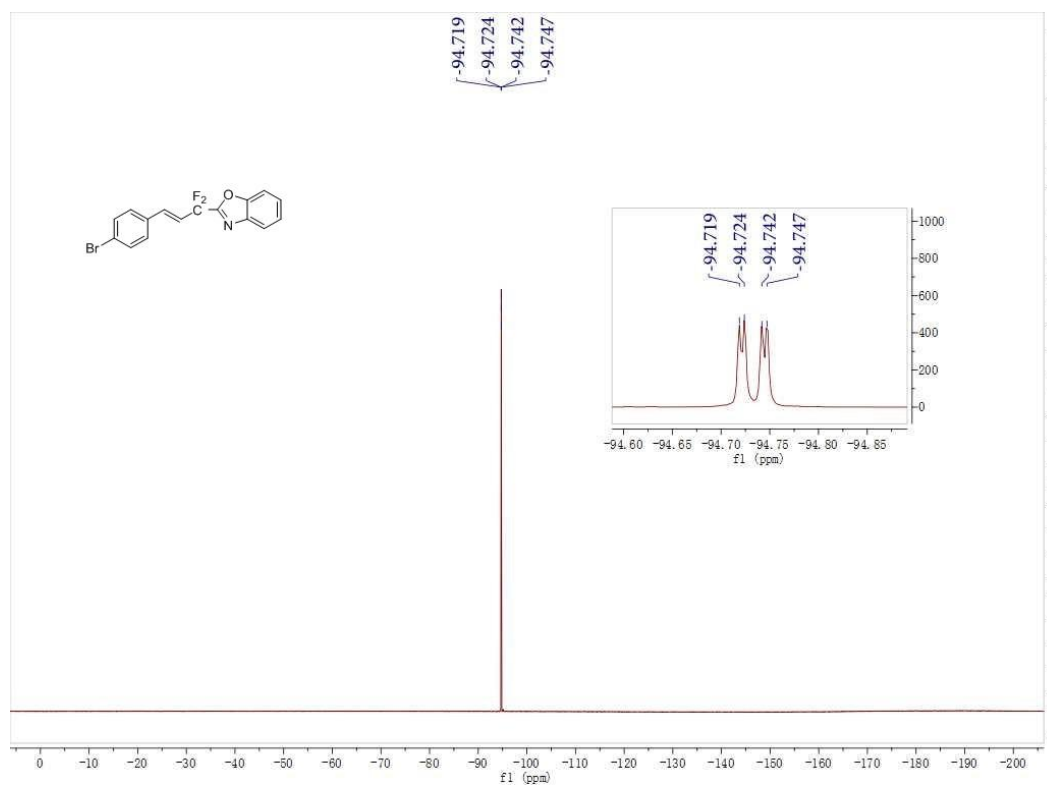



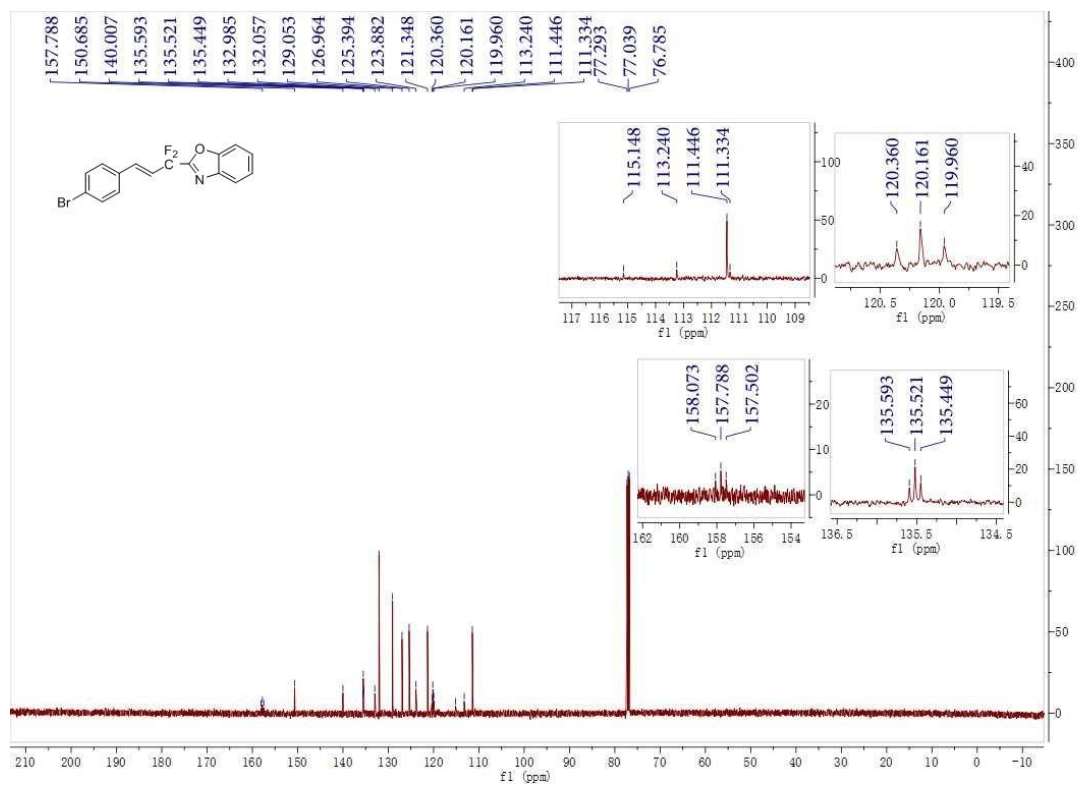

**(Z)-4-(benzo[d]oxazol-2-yl)-4,4-difluoro-2-phenylbut-2-en-1-yl acetate (3j)**

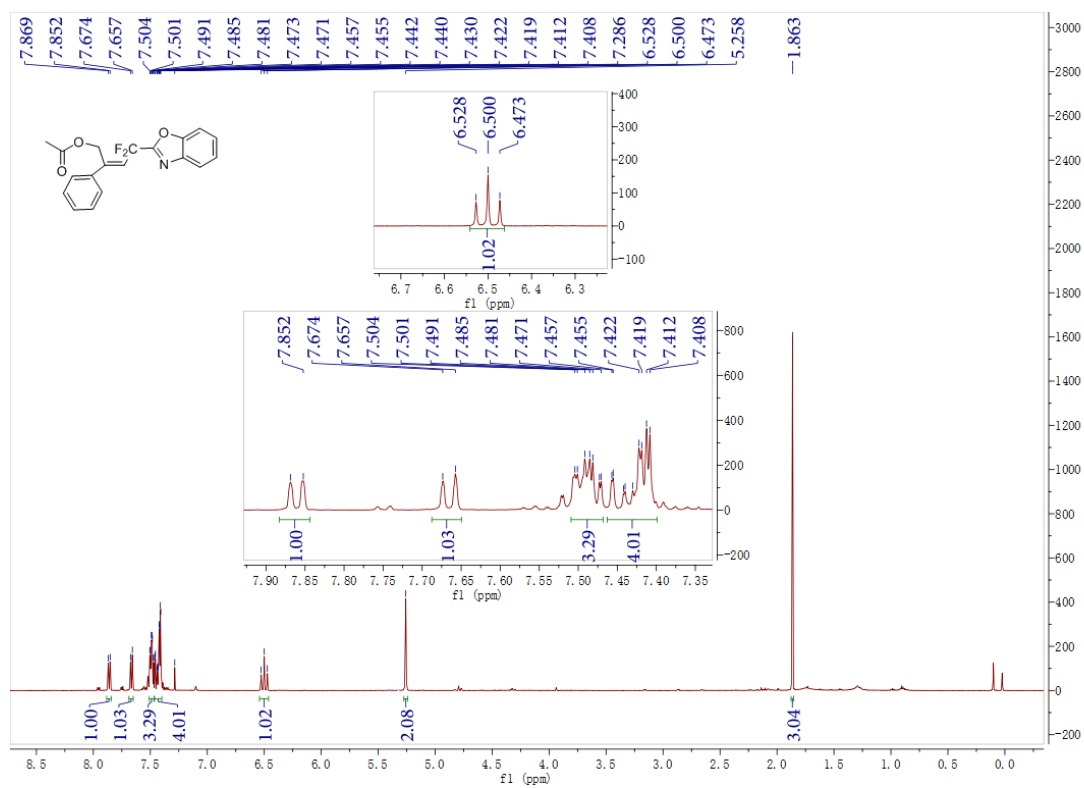

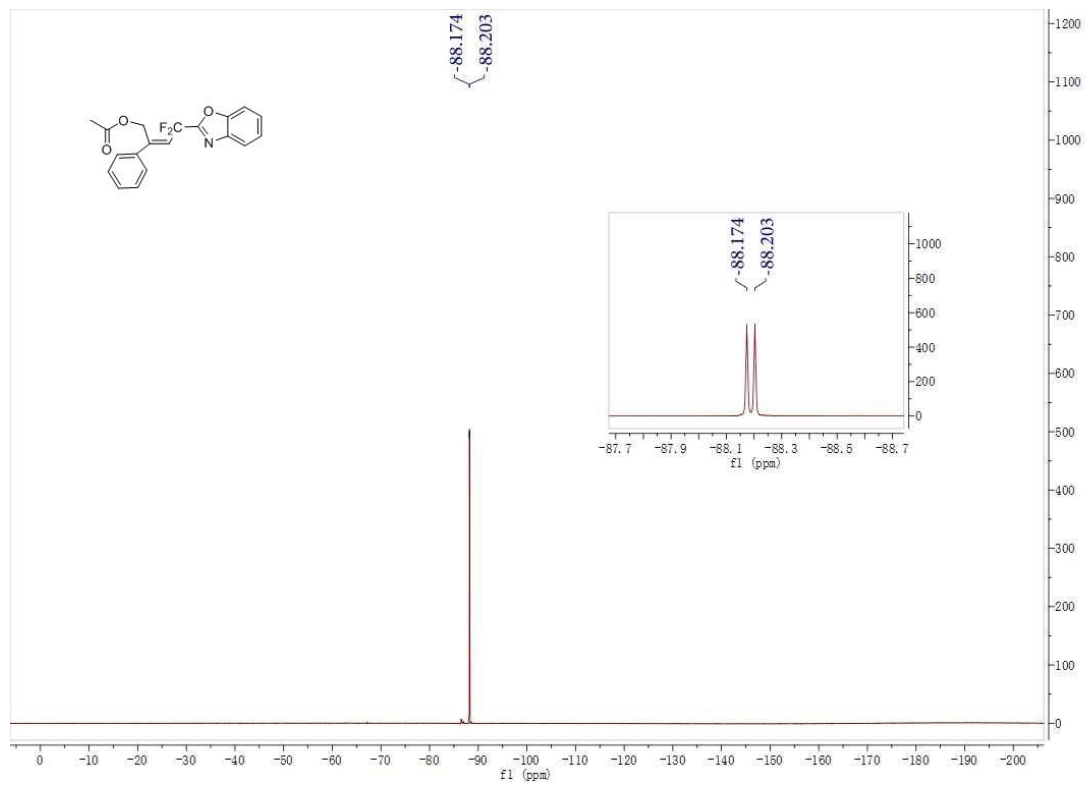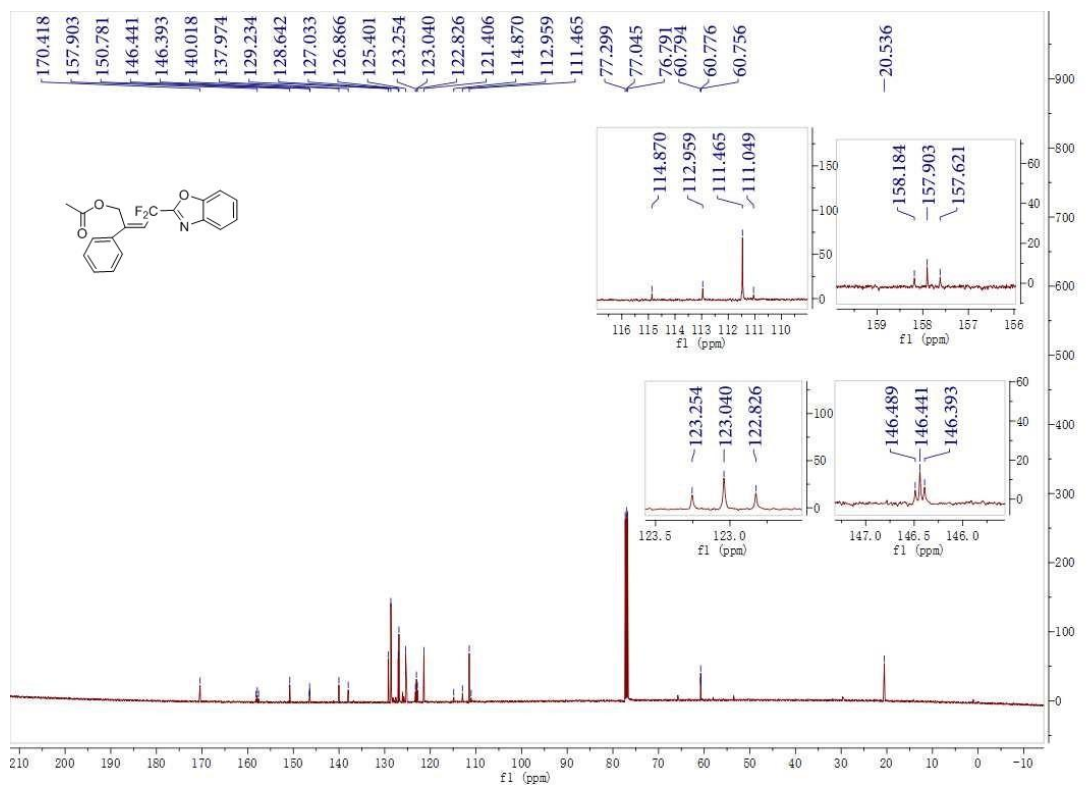

**(E)-2-(1,1-difluoro-4-phenylbut-2-en-1-yl)benzo[d]oxazole (3k)**

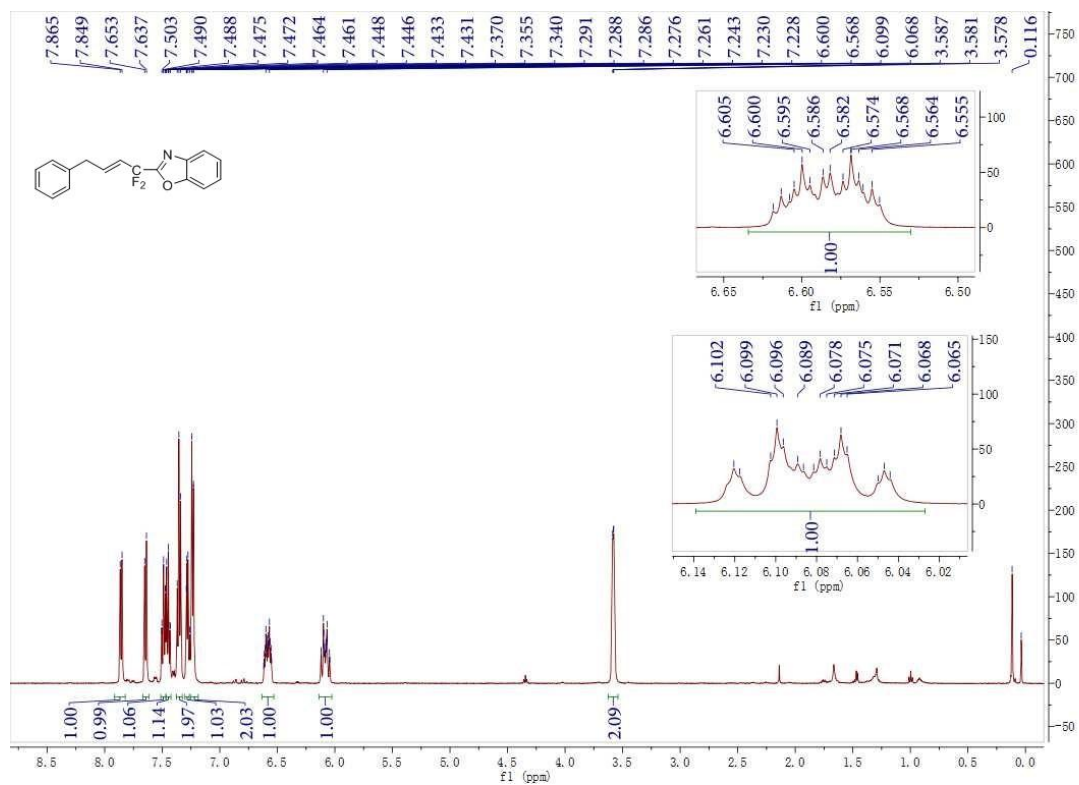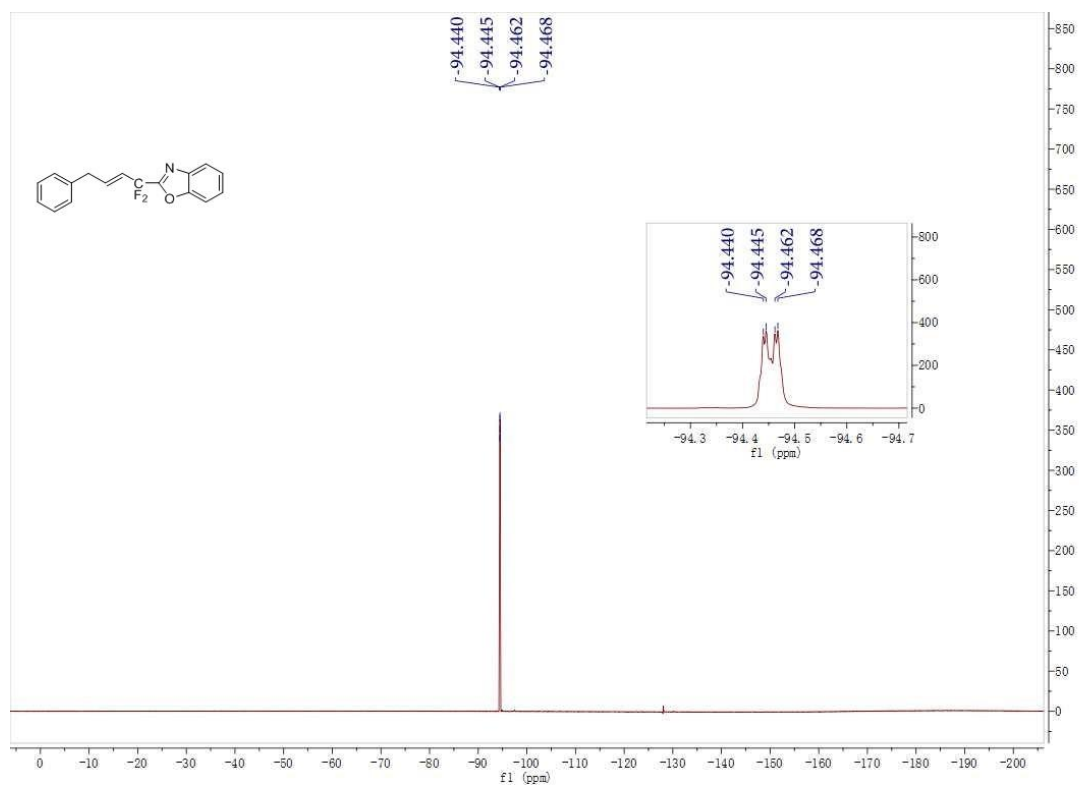

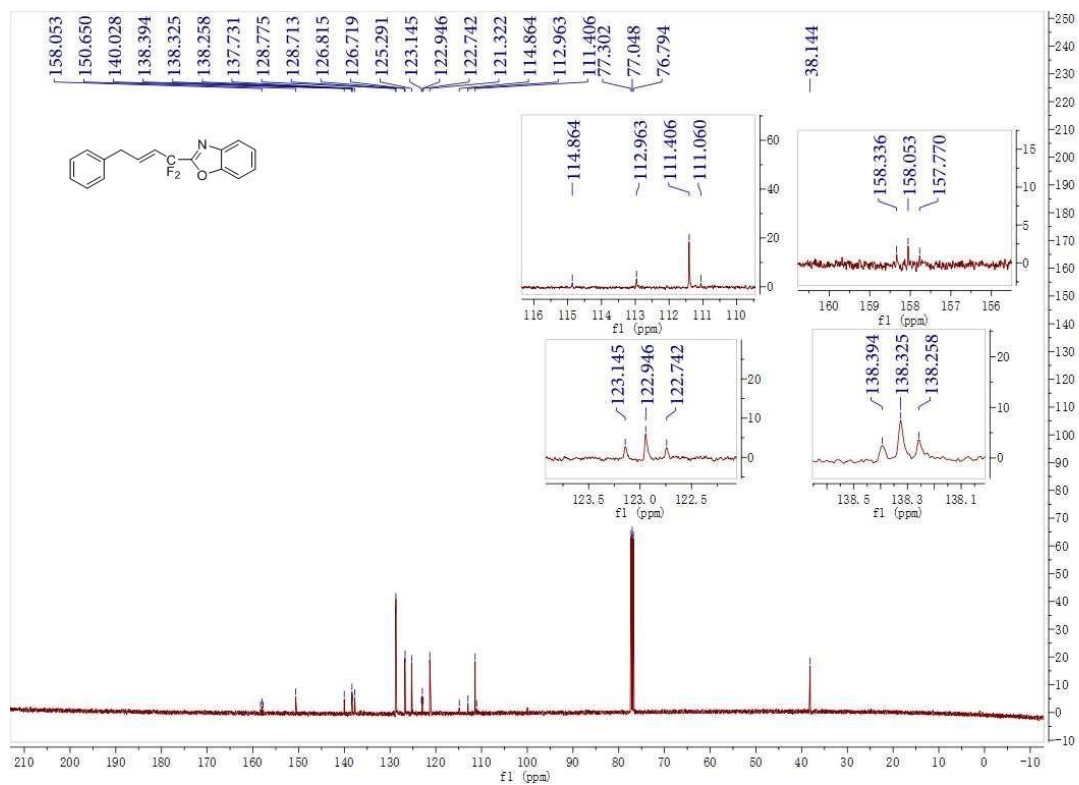

**(E)-2-(1,1-difluoro-4-phenylbut-3-en-1-yl)benzo[d]oxazole (3k')**

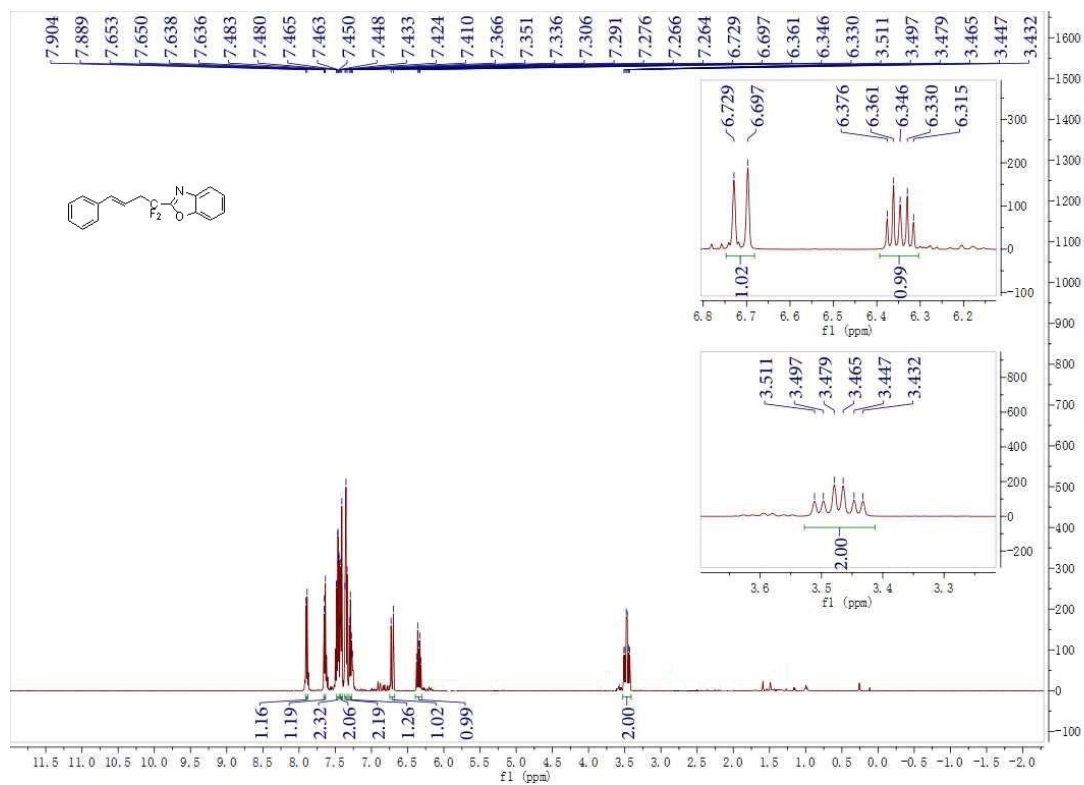

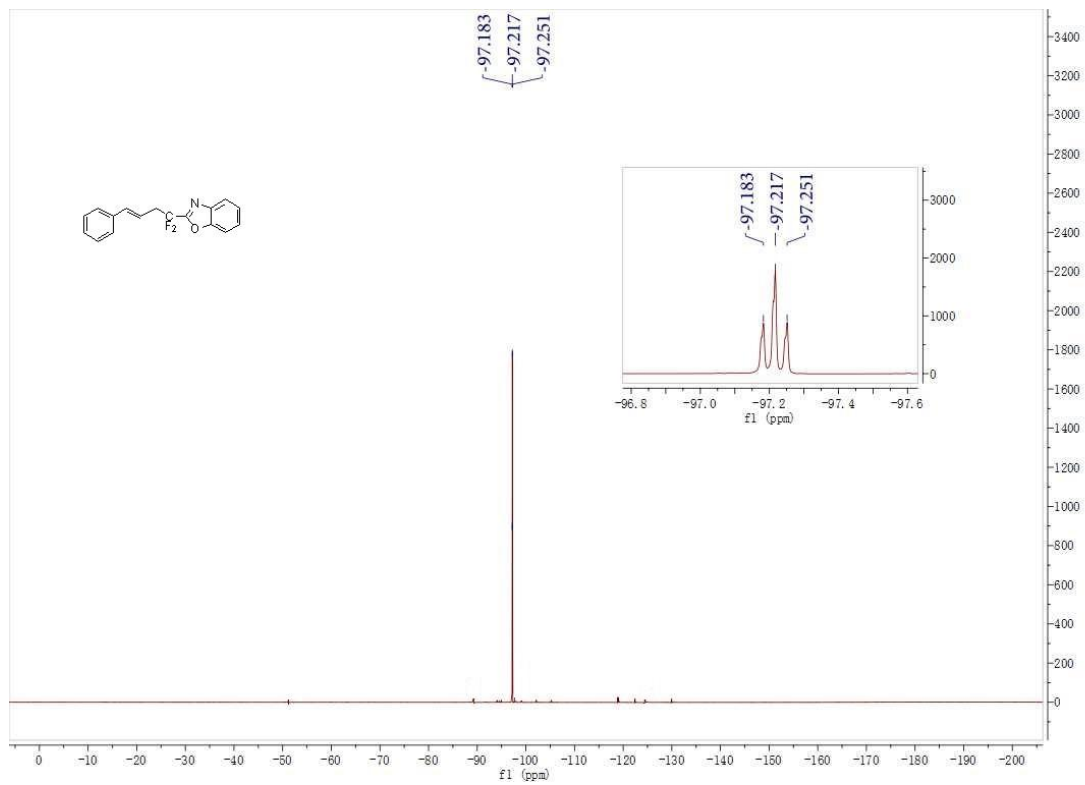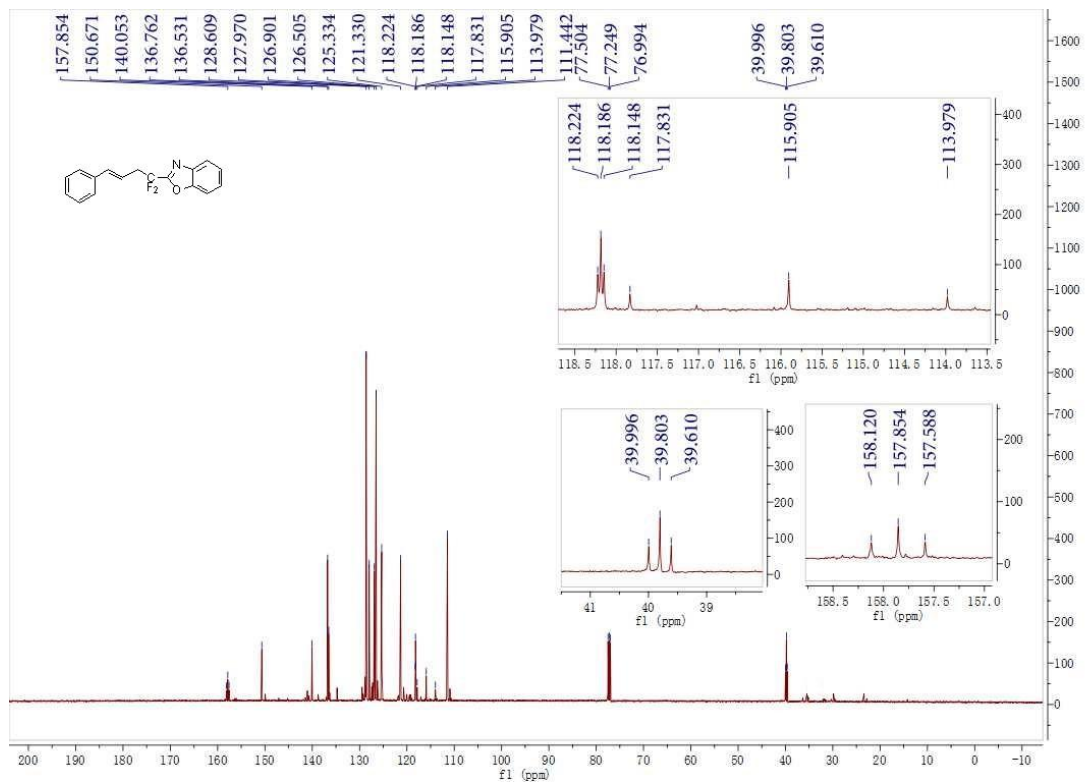

**(E)-2-(1,1-difluoro-5-phenylpent-2-en-1-yl)benzo[d]oxazole (3I)**

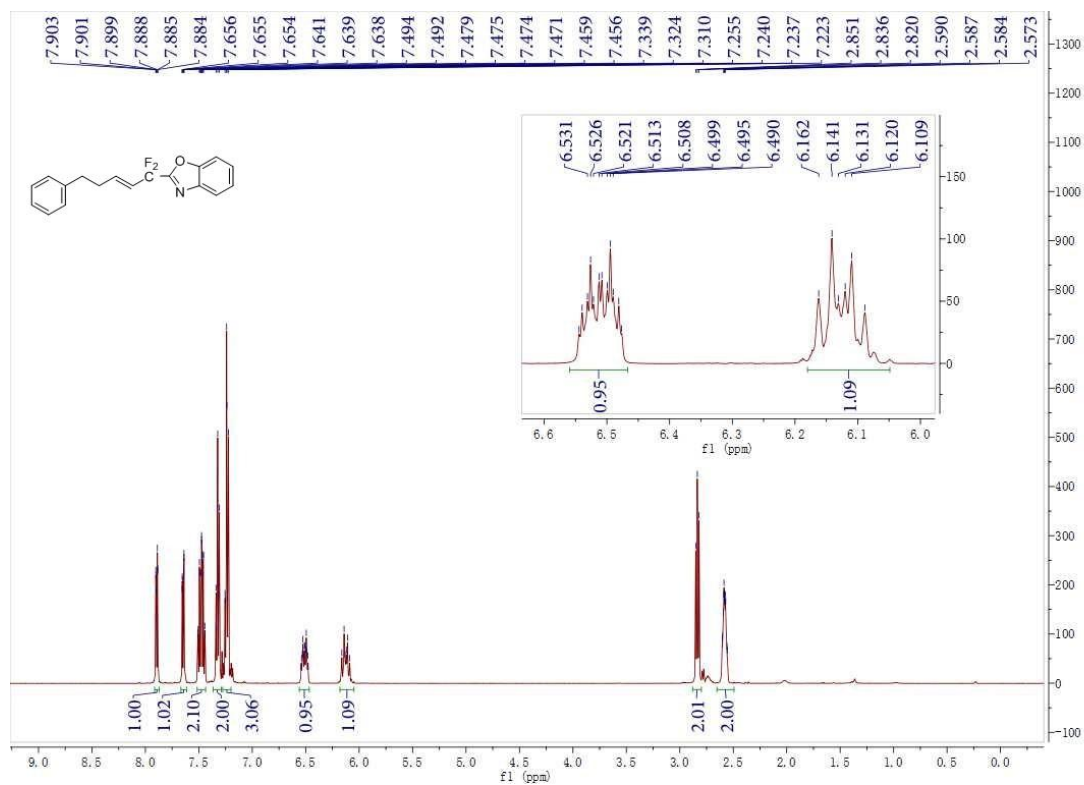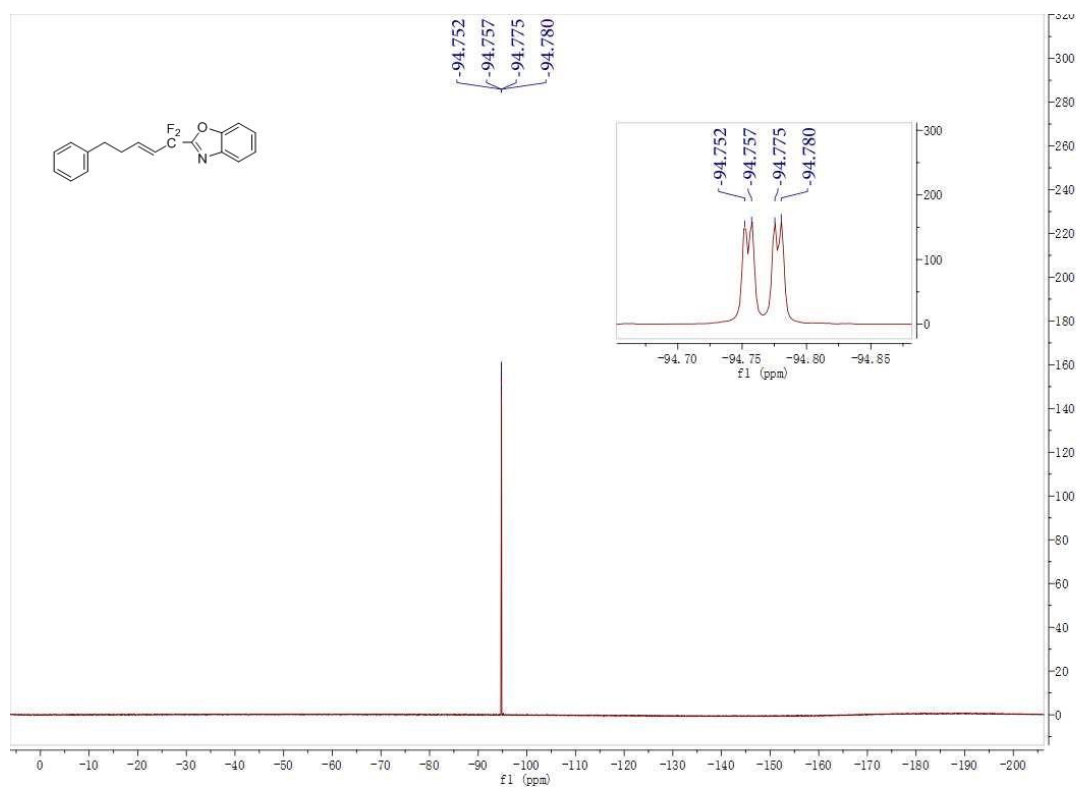



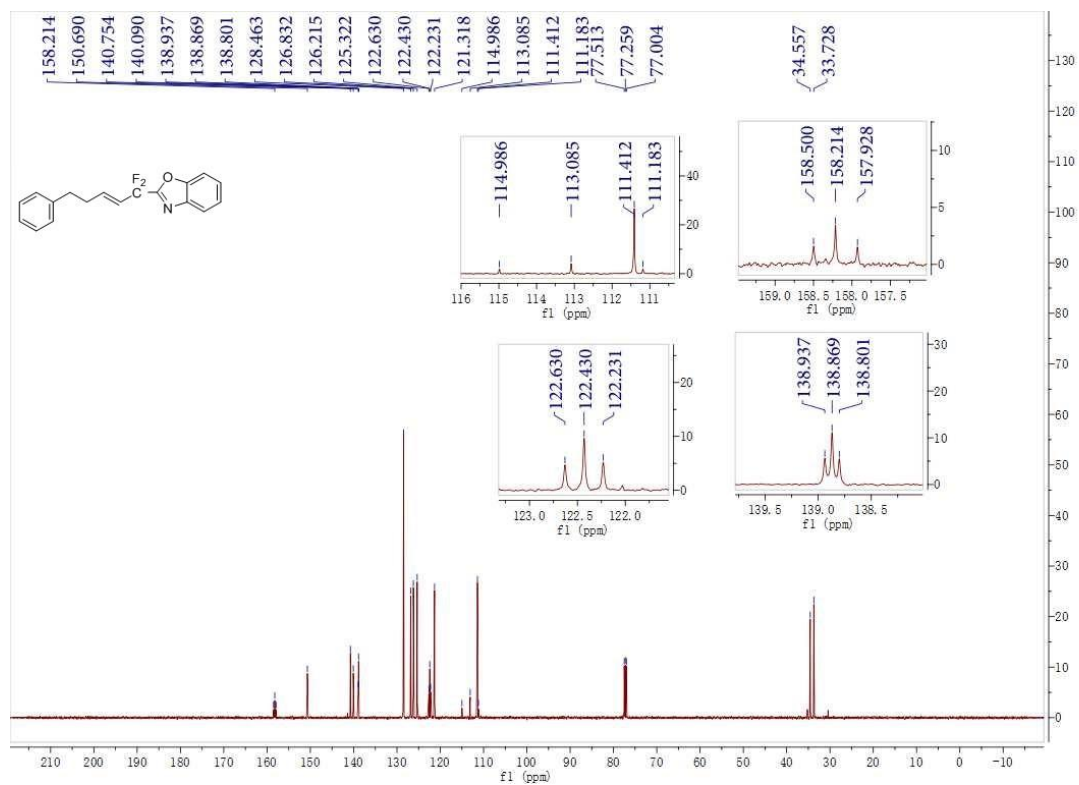

**2-(2-(2,3-dihydro-1H-inden-1-yl)-1,1-difluoroethyl)benzo[d]oxazole (4l)**

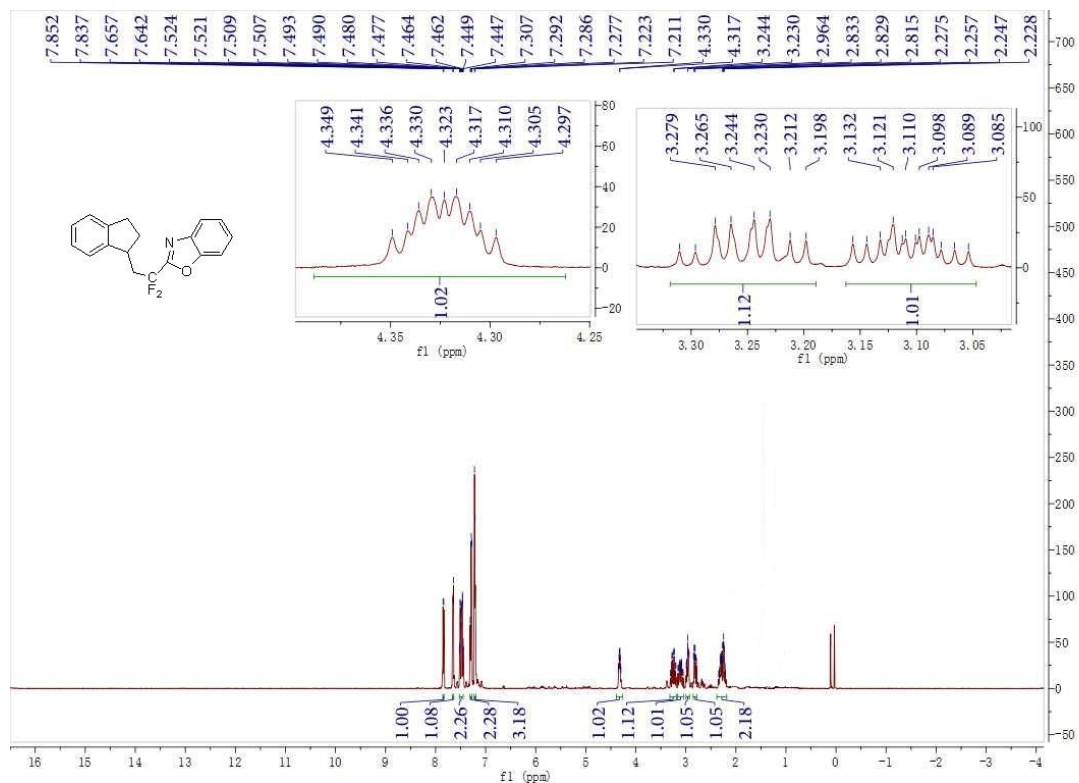

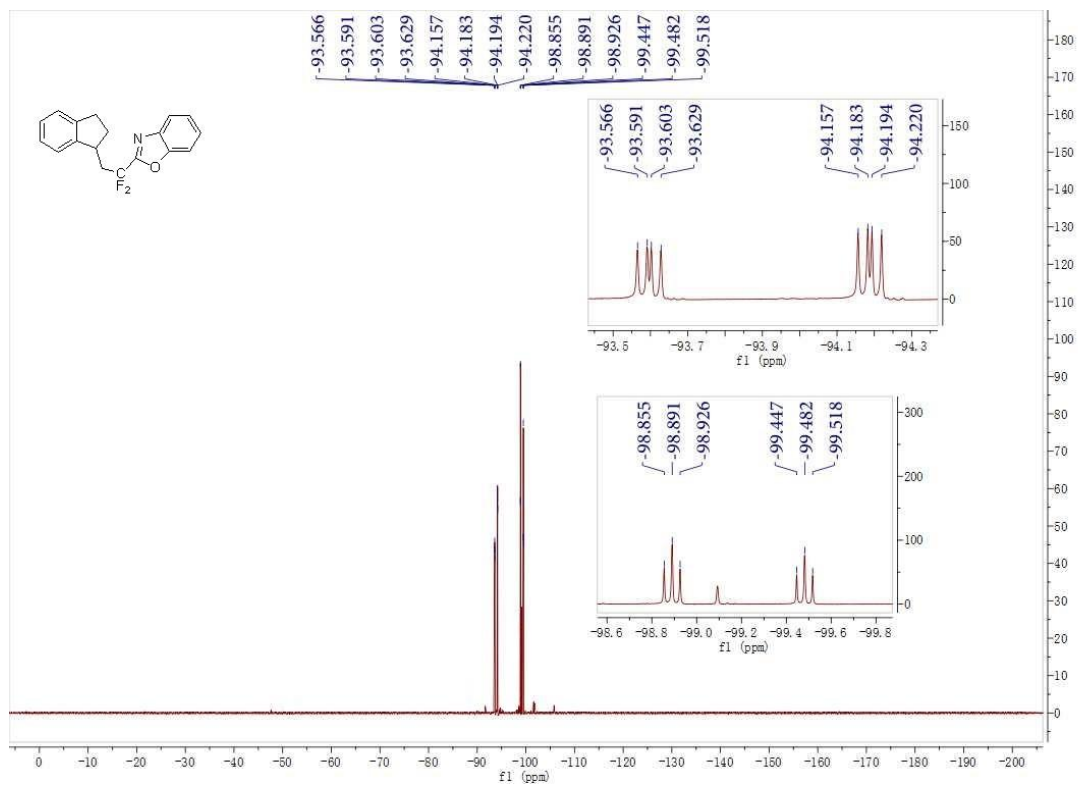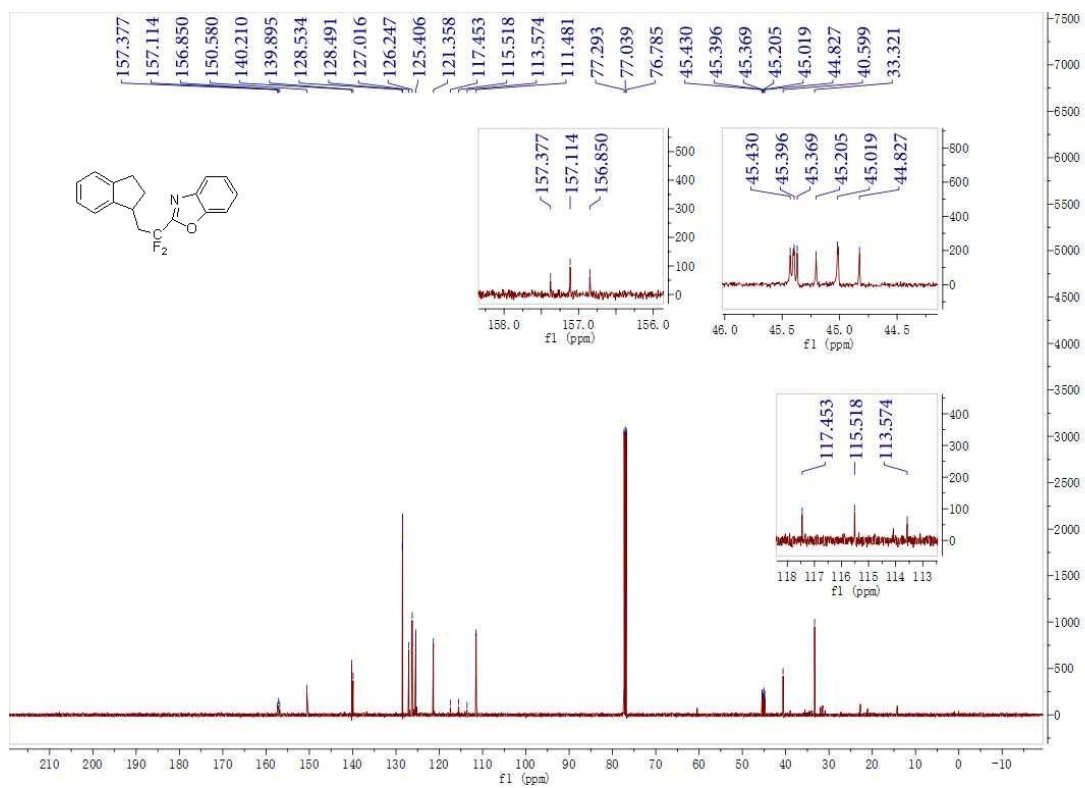



### 2-(1,1-difluoro-5-phenylpentyl)benzo[d]oxazole (5l)

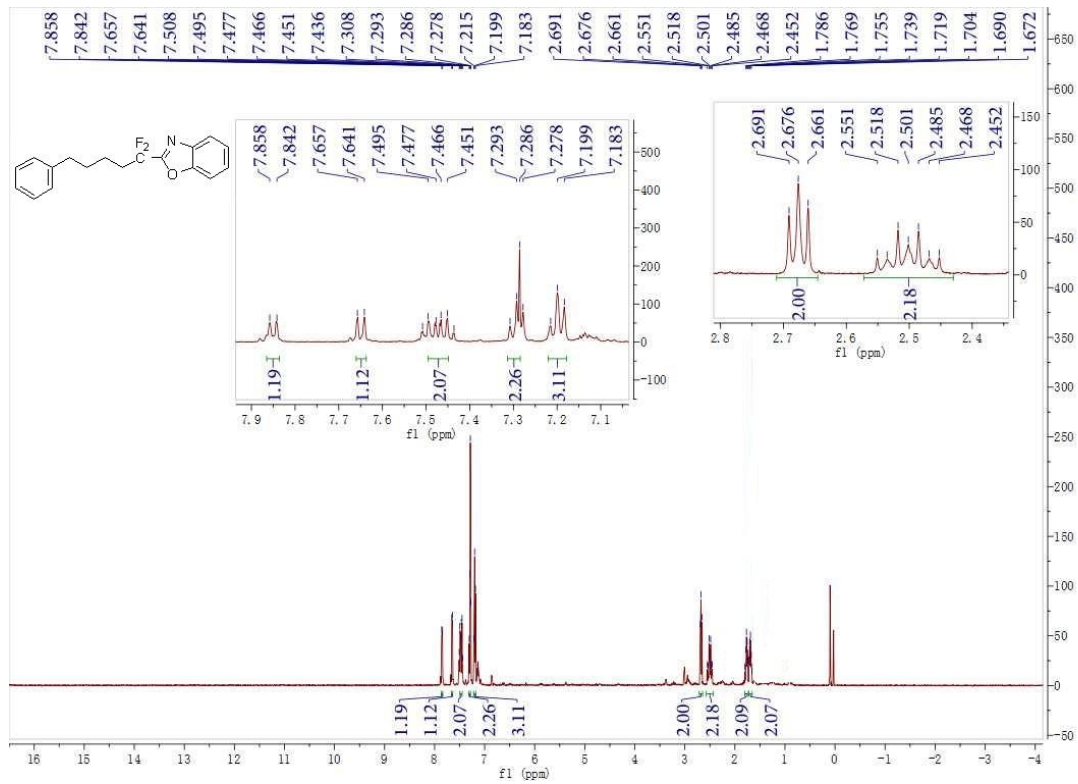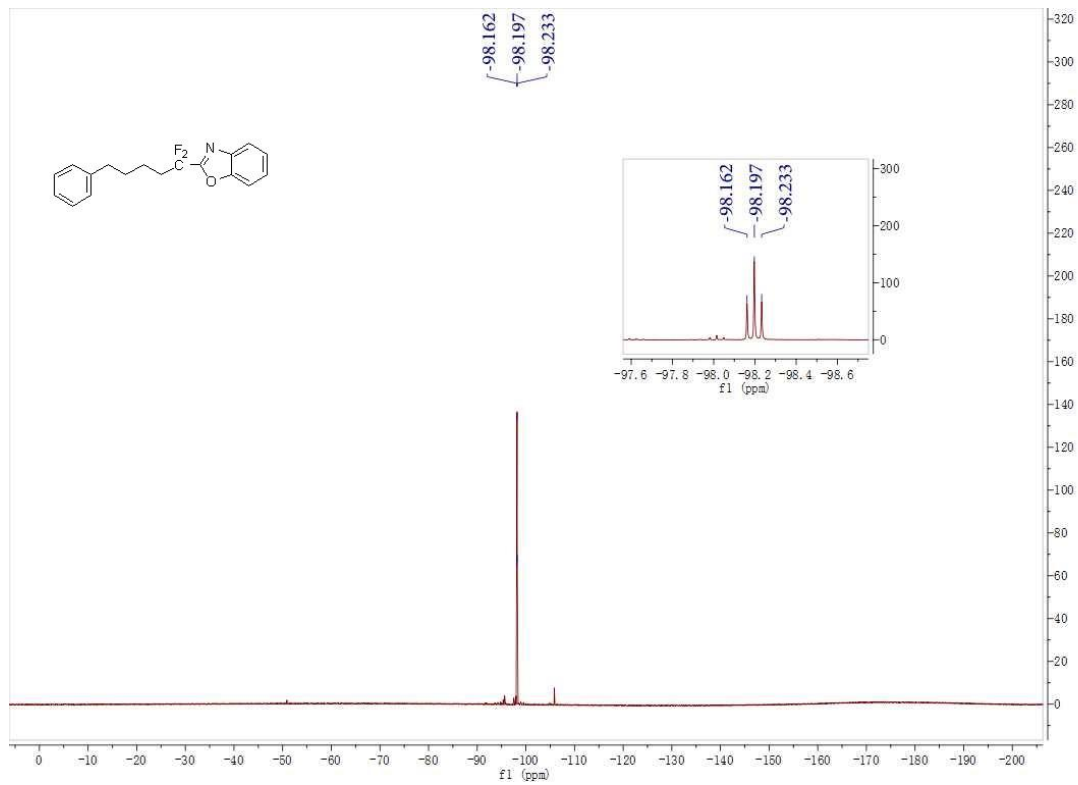

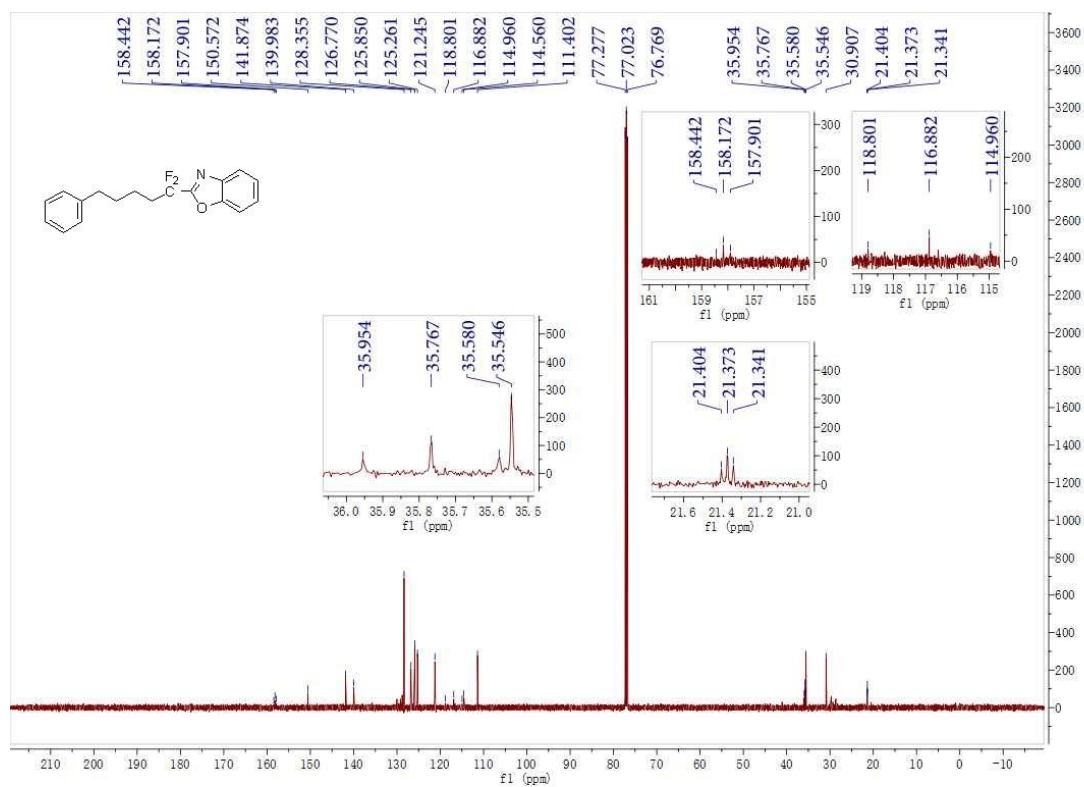

**(E)-2-(1,1-difluoroundec-2-en-1-yl)benzo[d]oxazole (3m)**

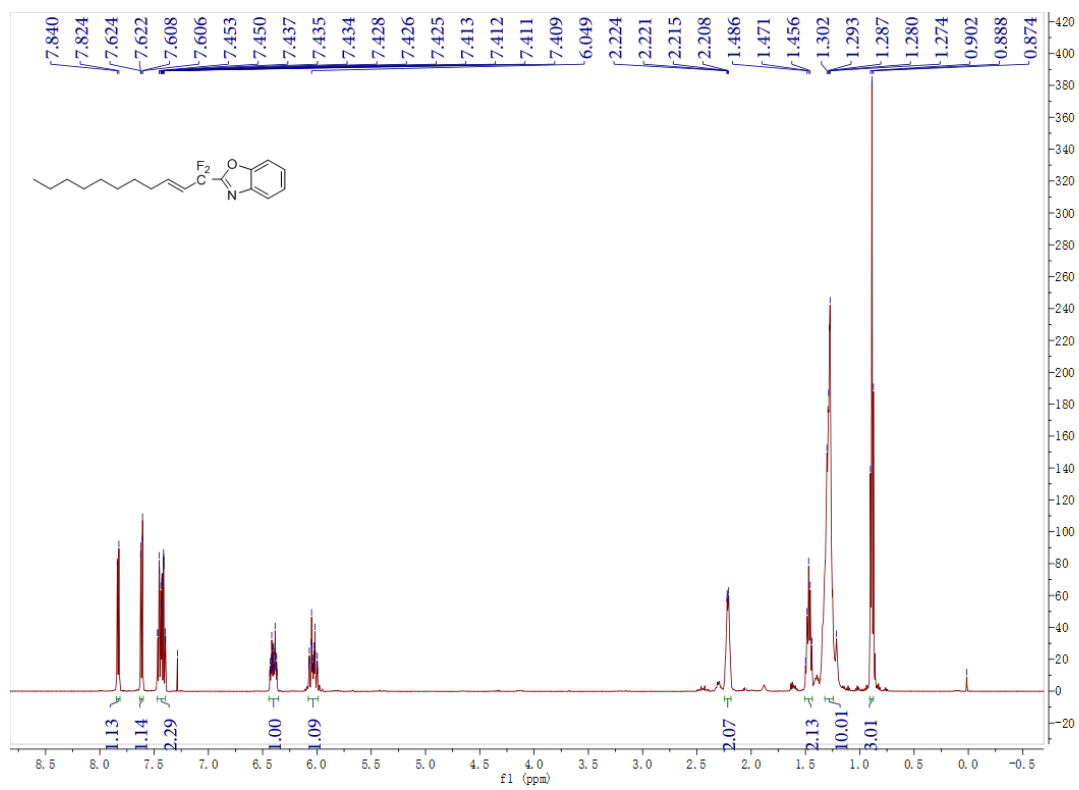

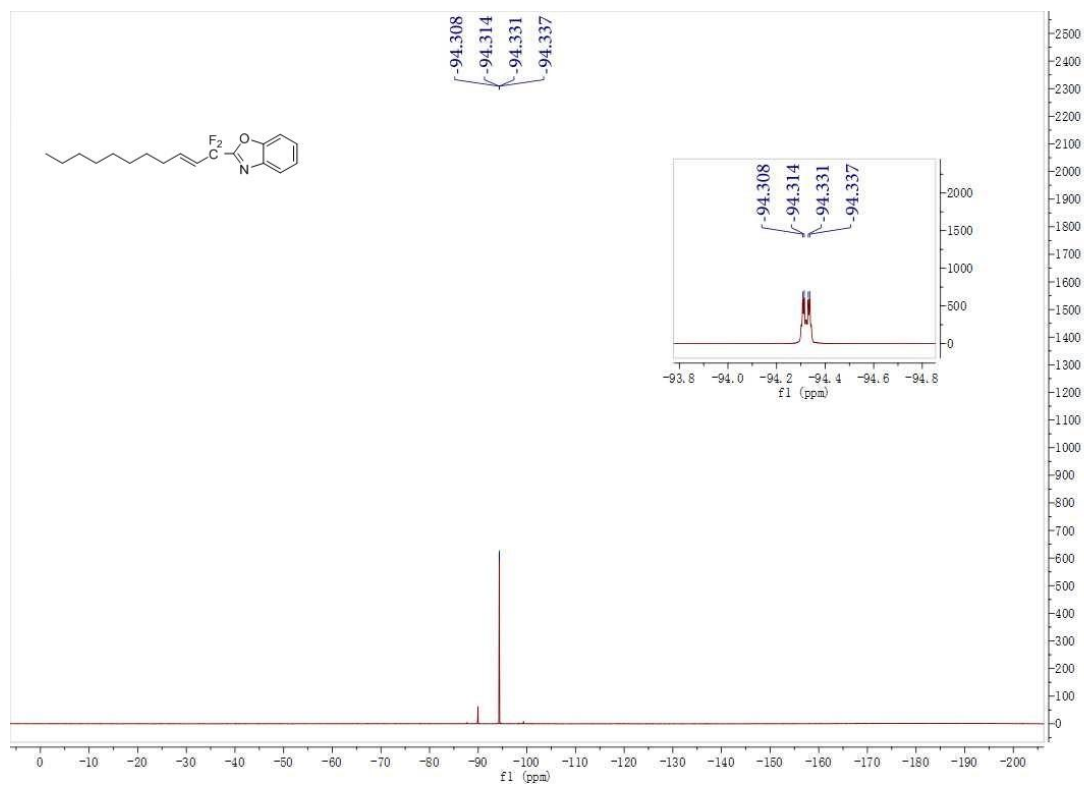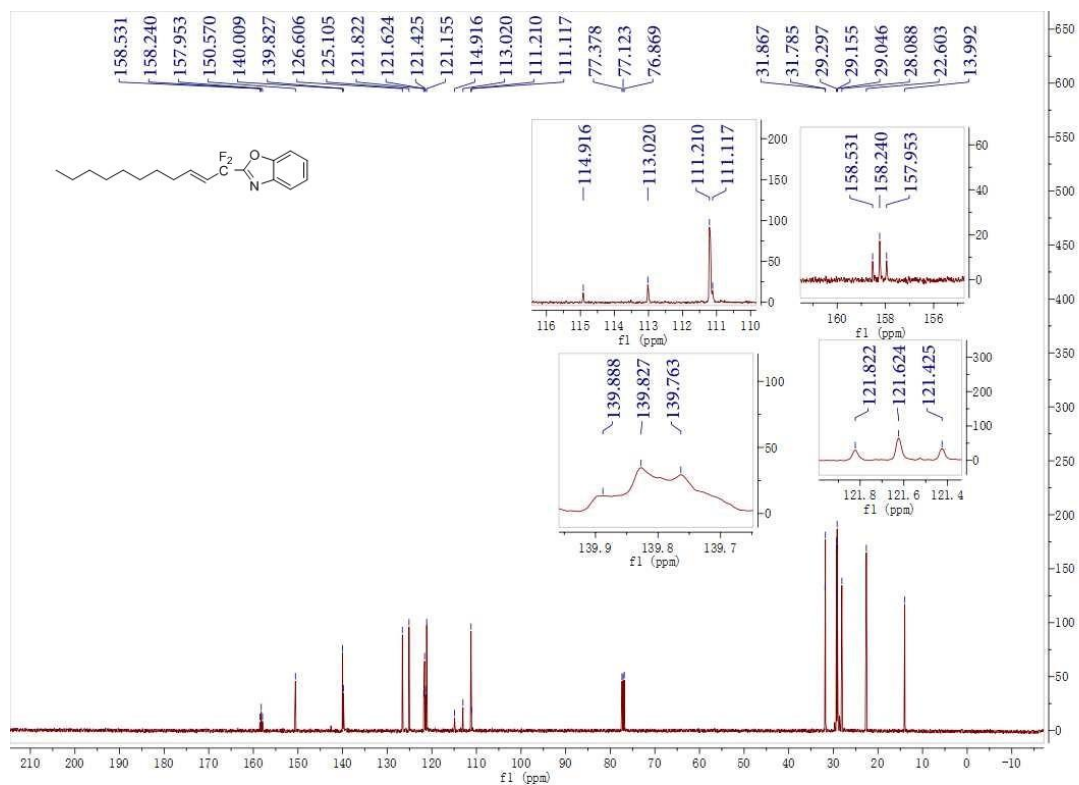

2-(1,1-difluoro-2-(4-phenylcyclohexylidene)ethyl)benzo[d]oxazole (3n)

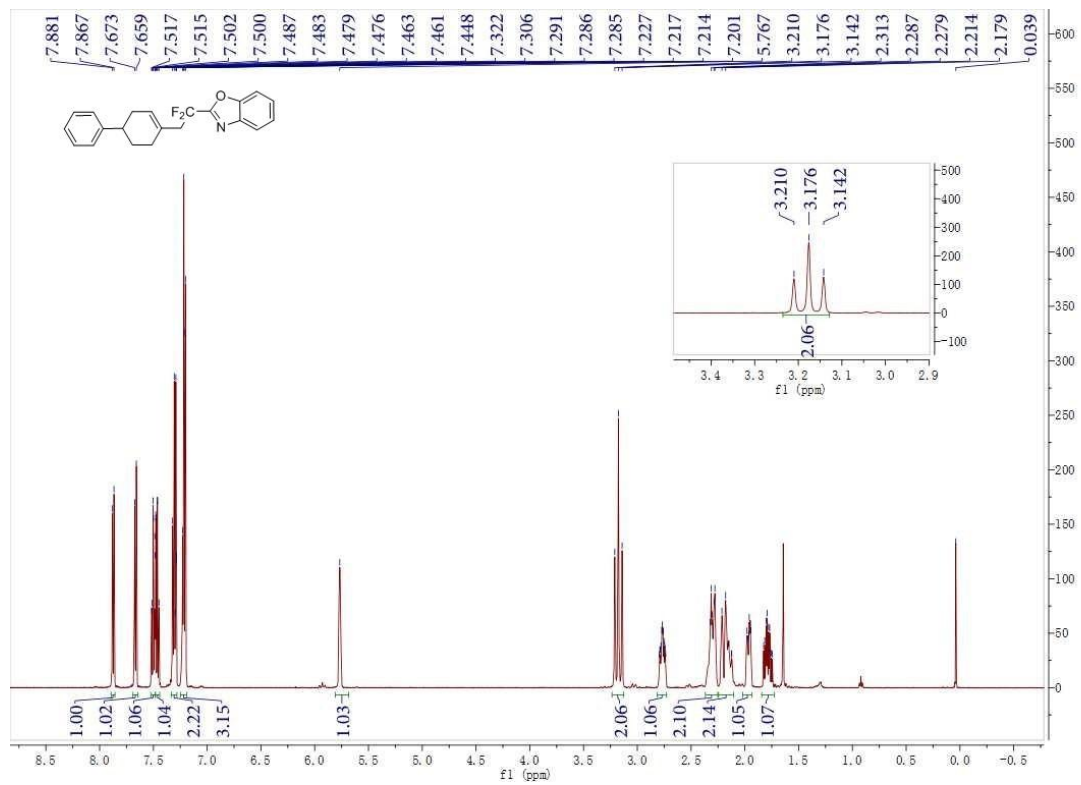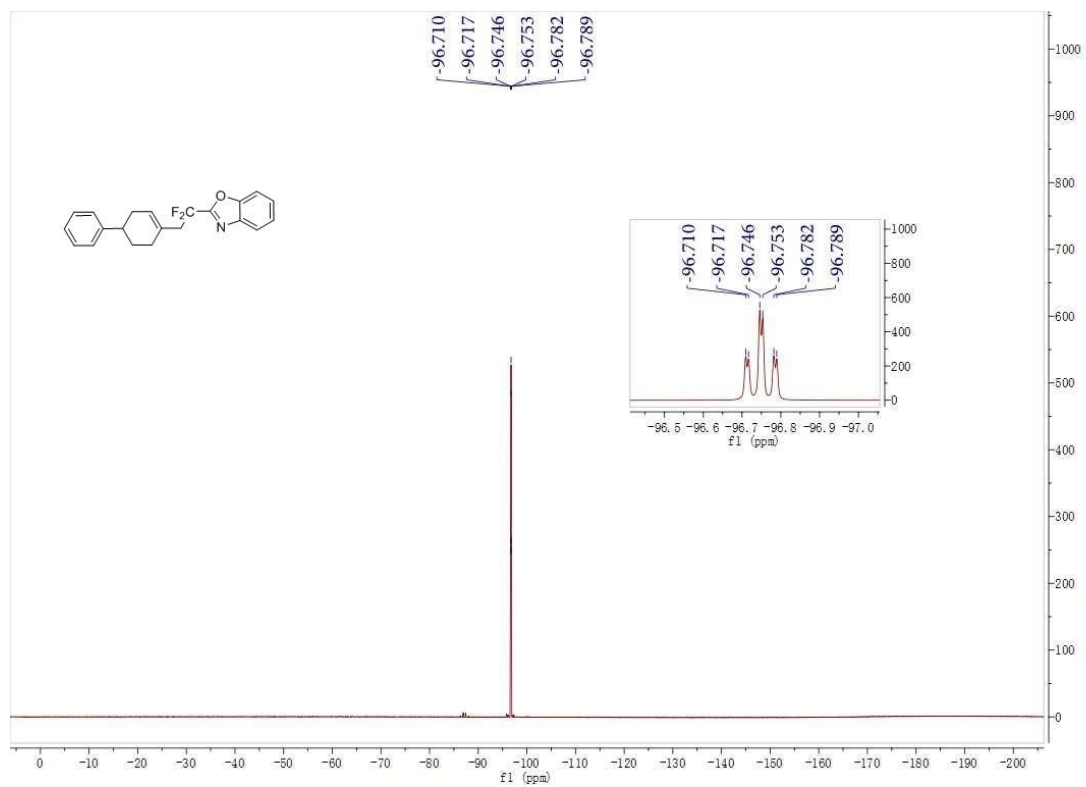

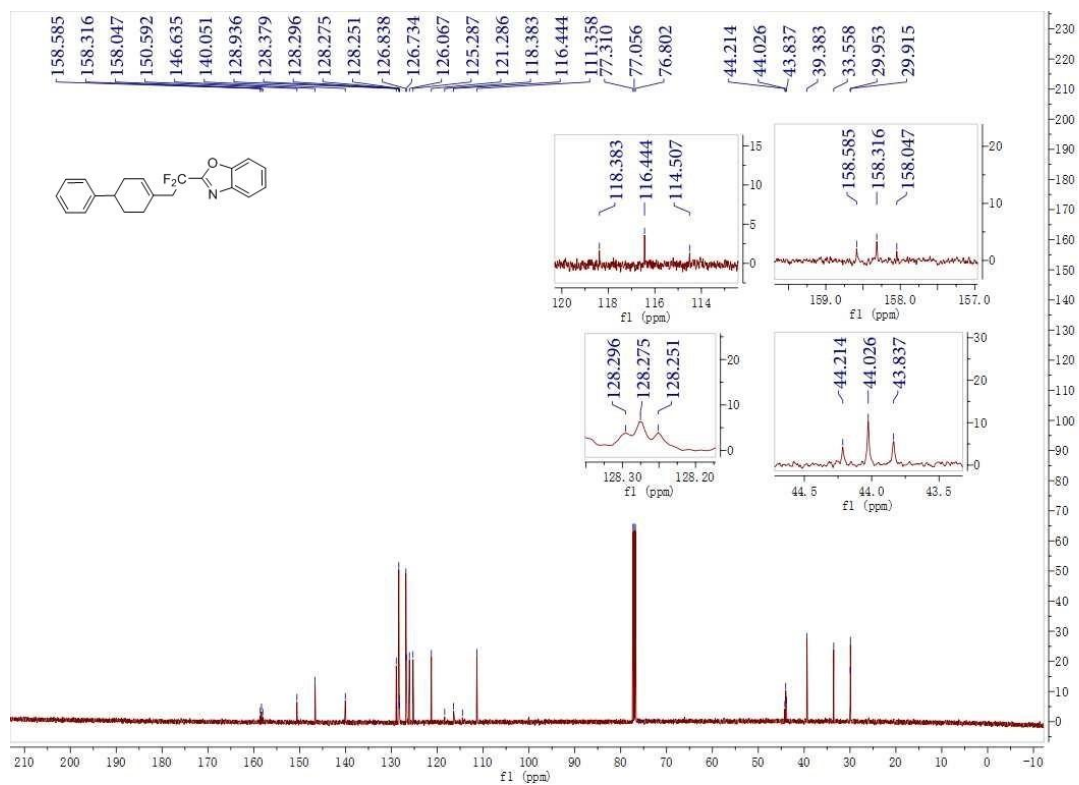

**(E)-2-(1,1-difluoro-7-(naphthalen-2-yloxy)hept-2-en-1-yl)benzo[d]oxazole (3o)**



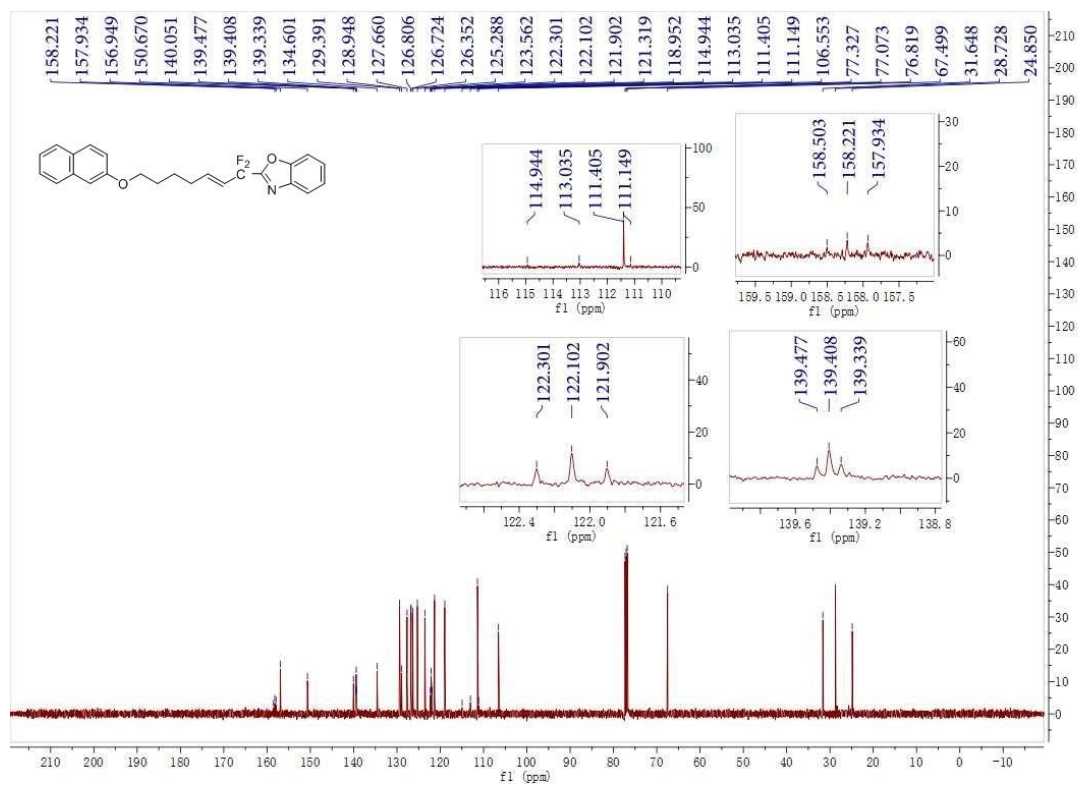

**(E)-2-(1,1-difluoro-5-(p-toloxypent-2-en-1-yl)benzo[d]oxazole (3p)**

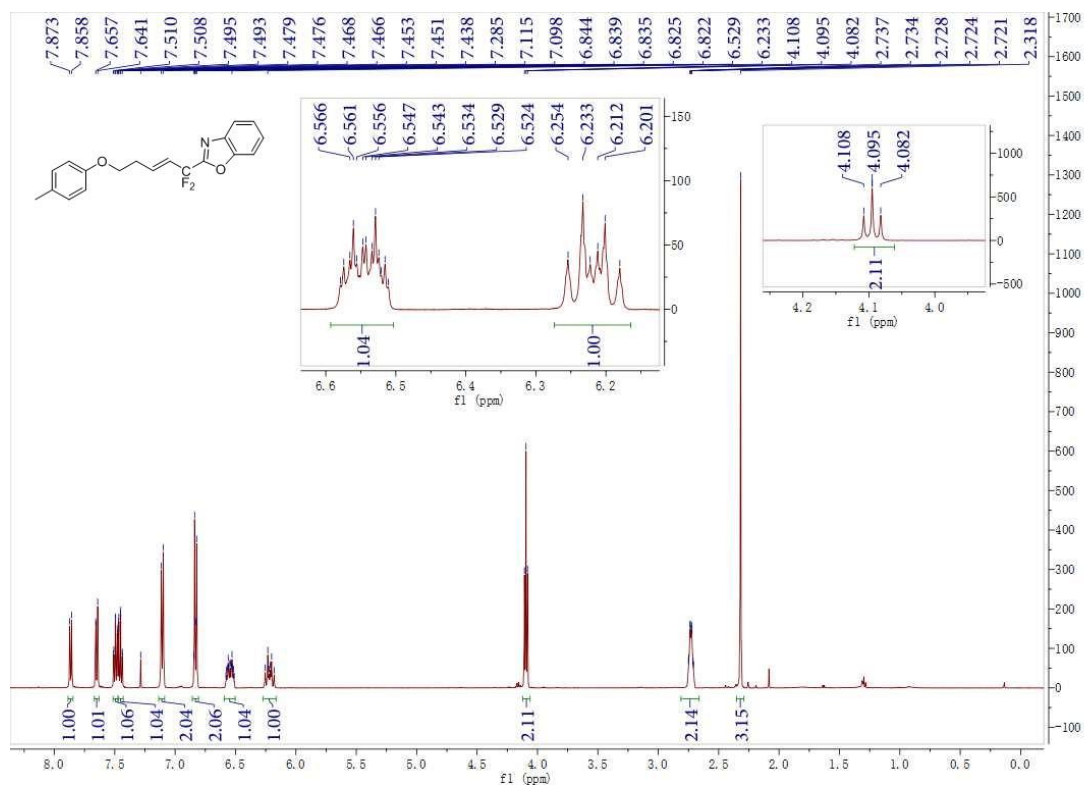



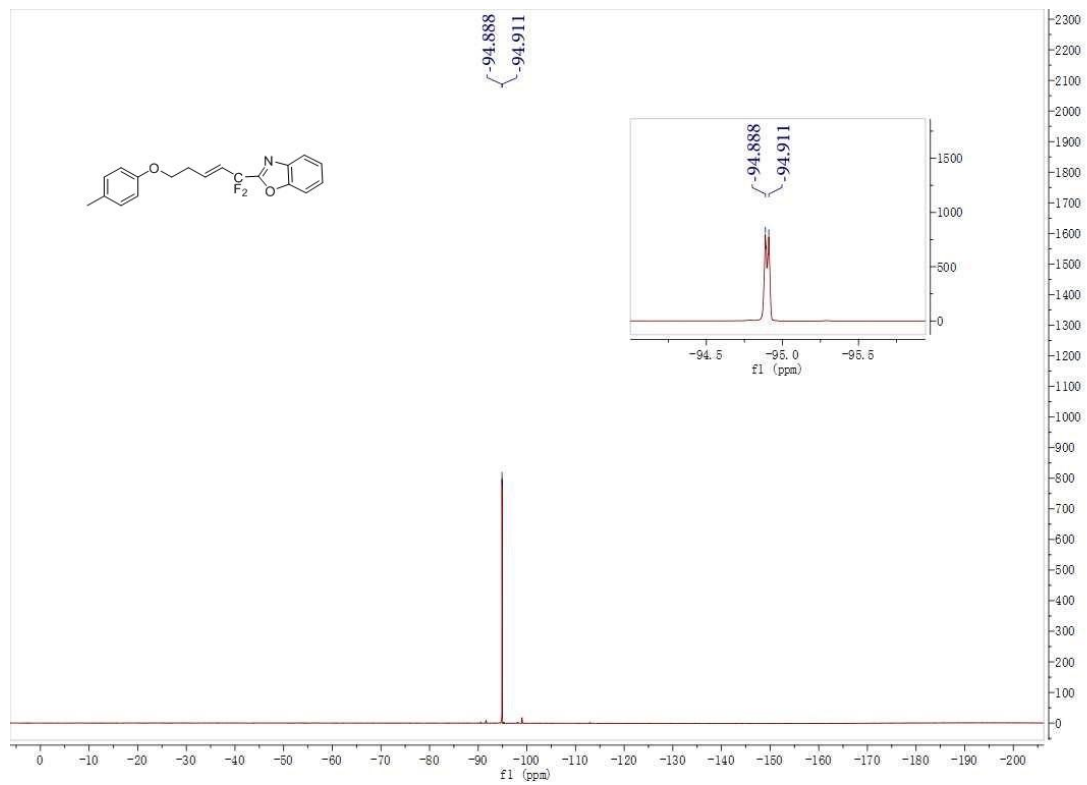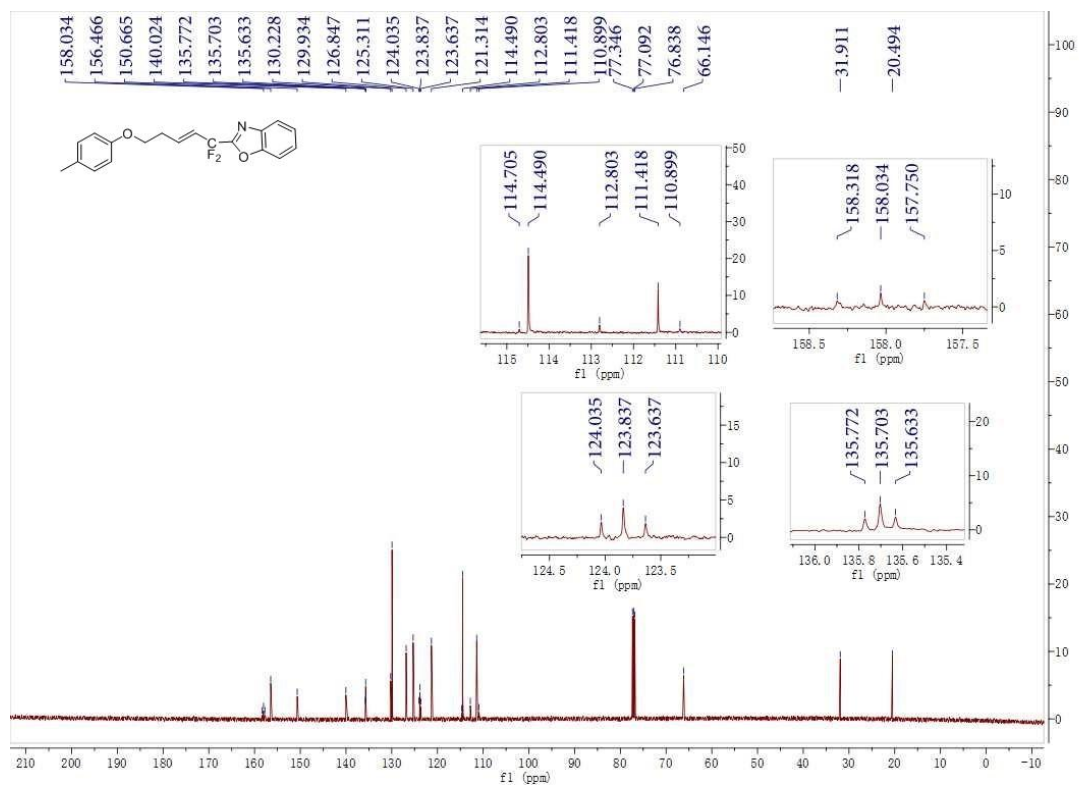



**2-(2-(chroman-4-yl)-1,1-difluoroethyl)benzo[d]oxazole (4p)**

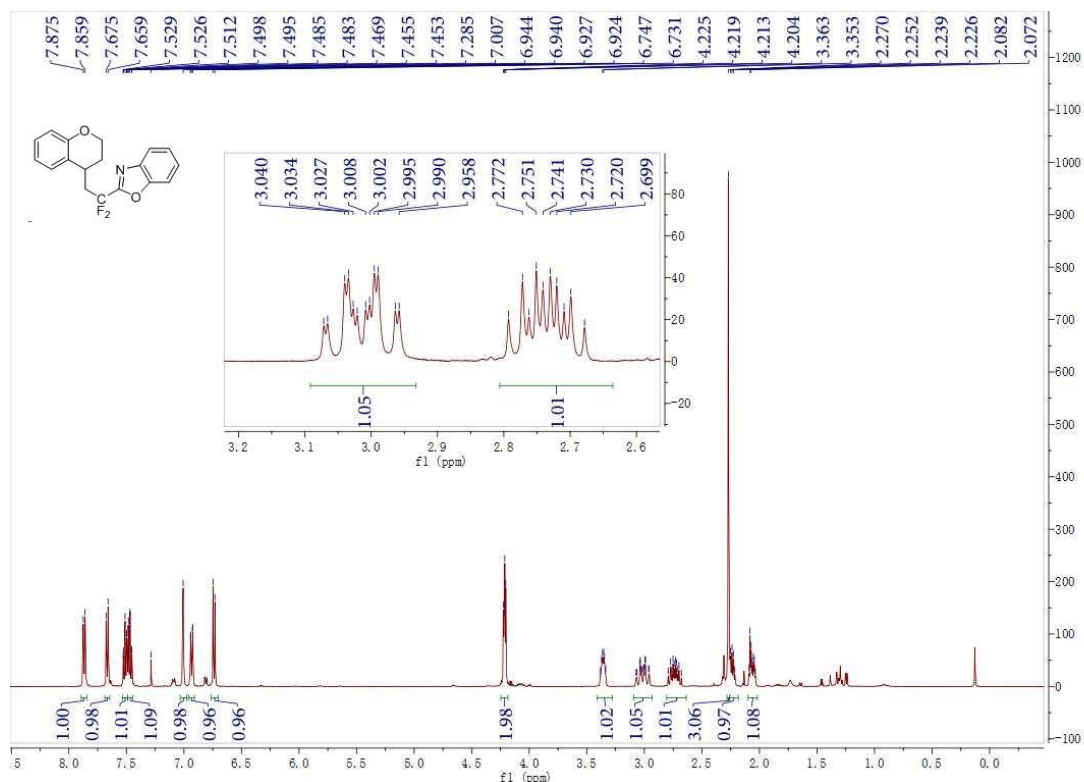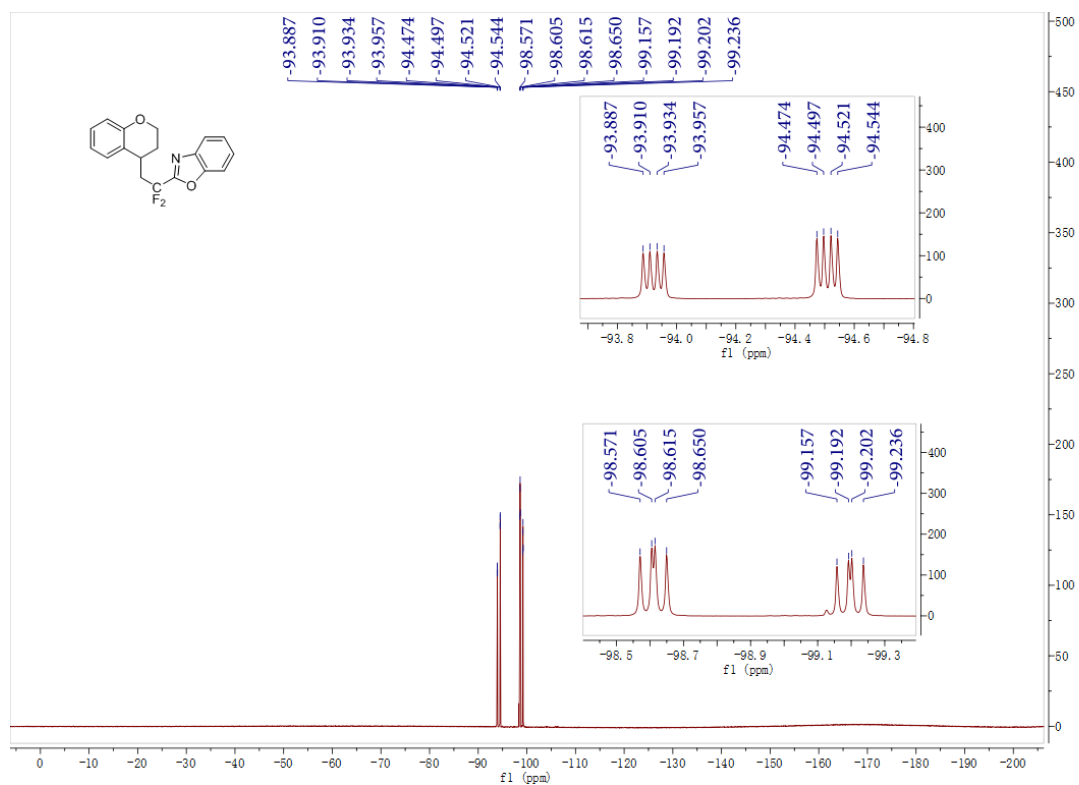

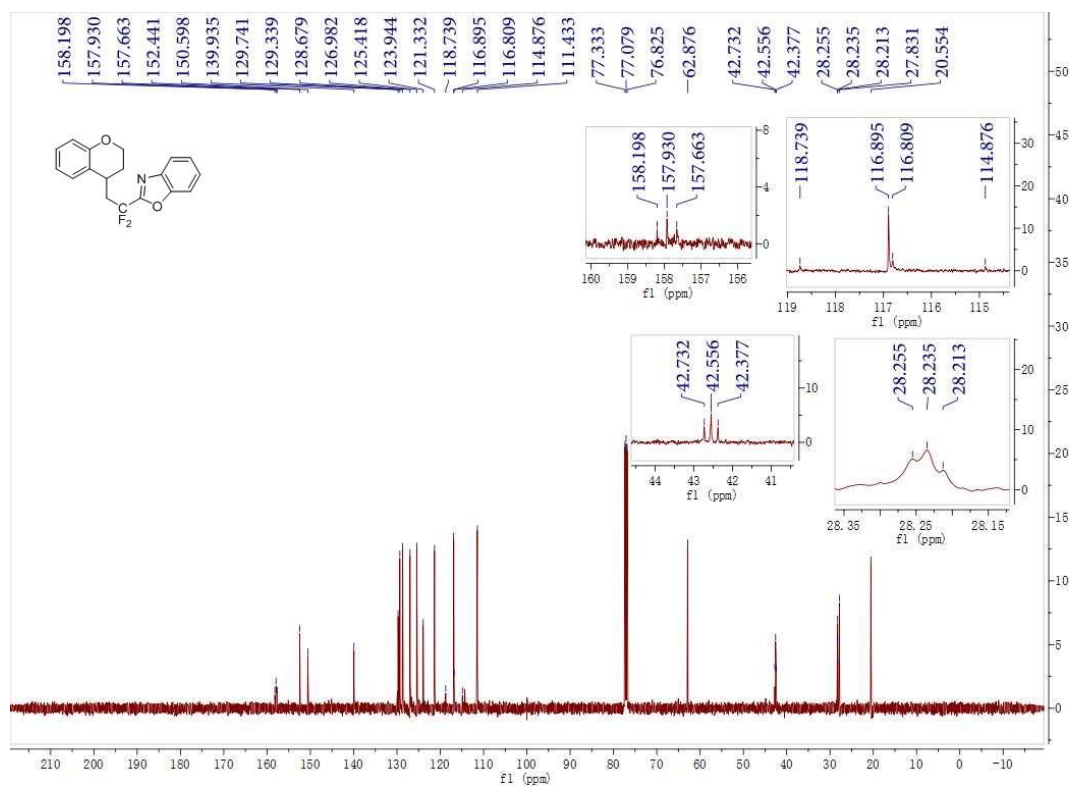

**(E)-2-(1,1-difluoro-4-(p-toloxo)but-2-en-1-yl)benzo[d]oxazole (3q)**

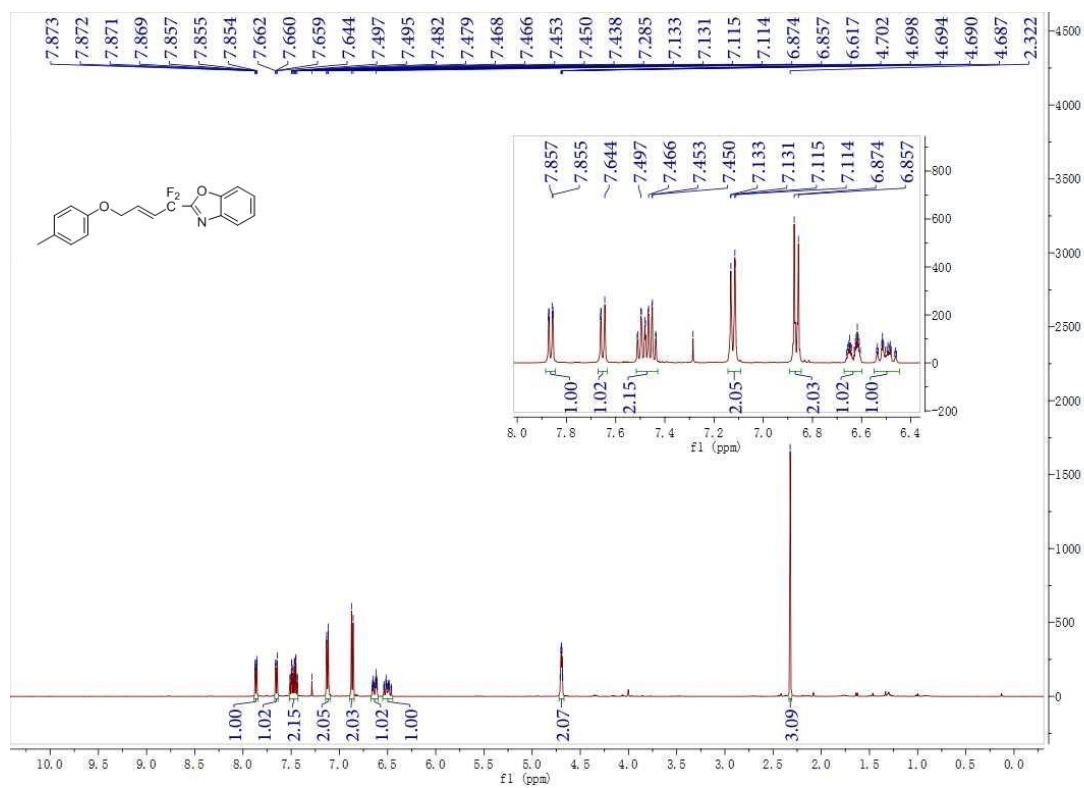

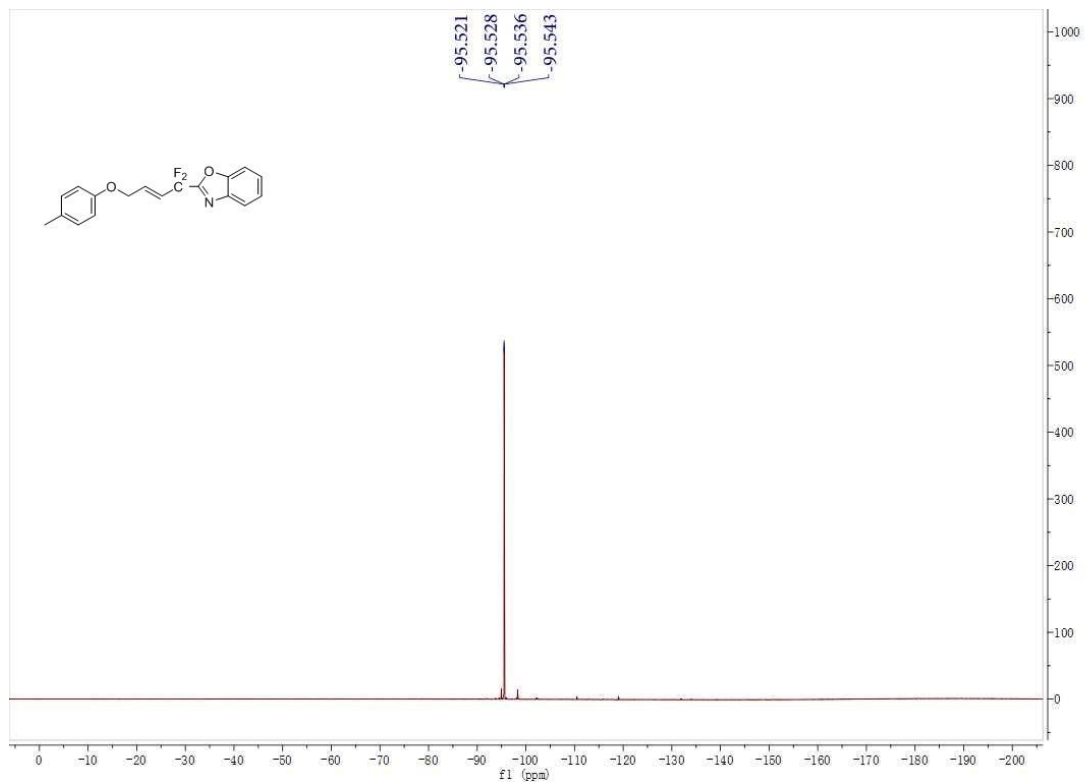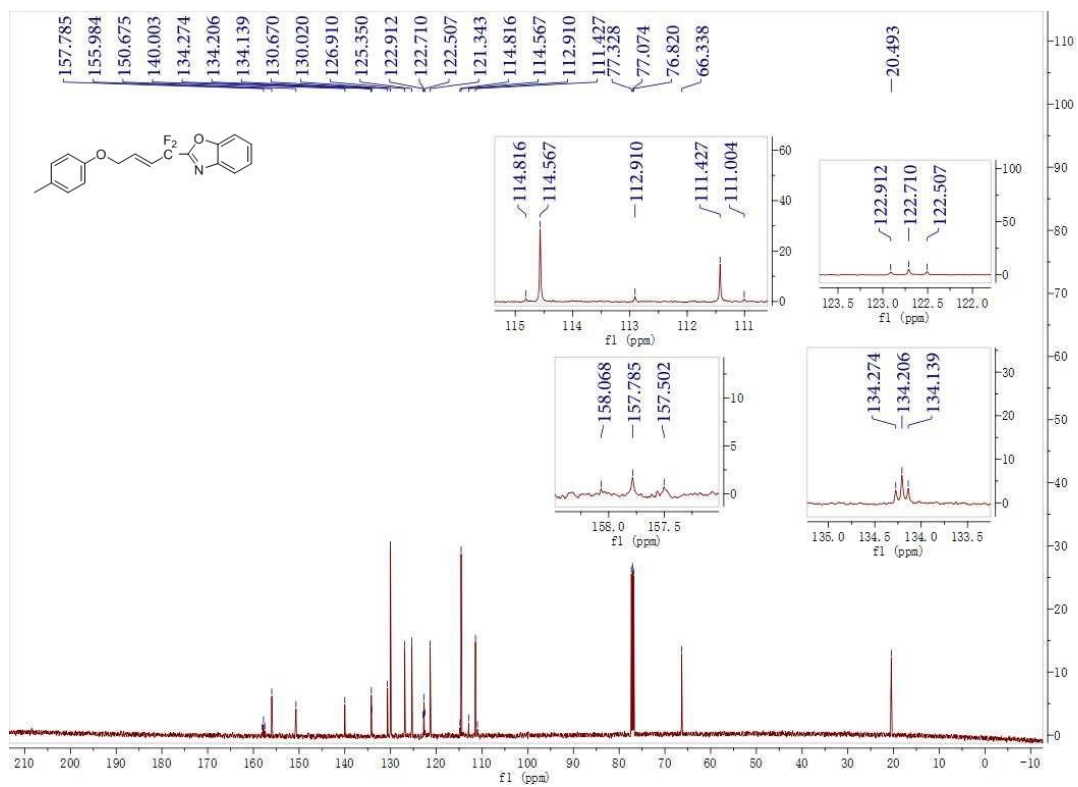

**(E)-6-(benzo[d]oxazol-2-yl)-6,6-difluorohex-4-en-1-yl 4-iodobenzoate (3r)**

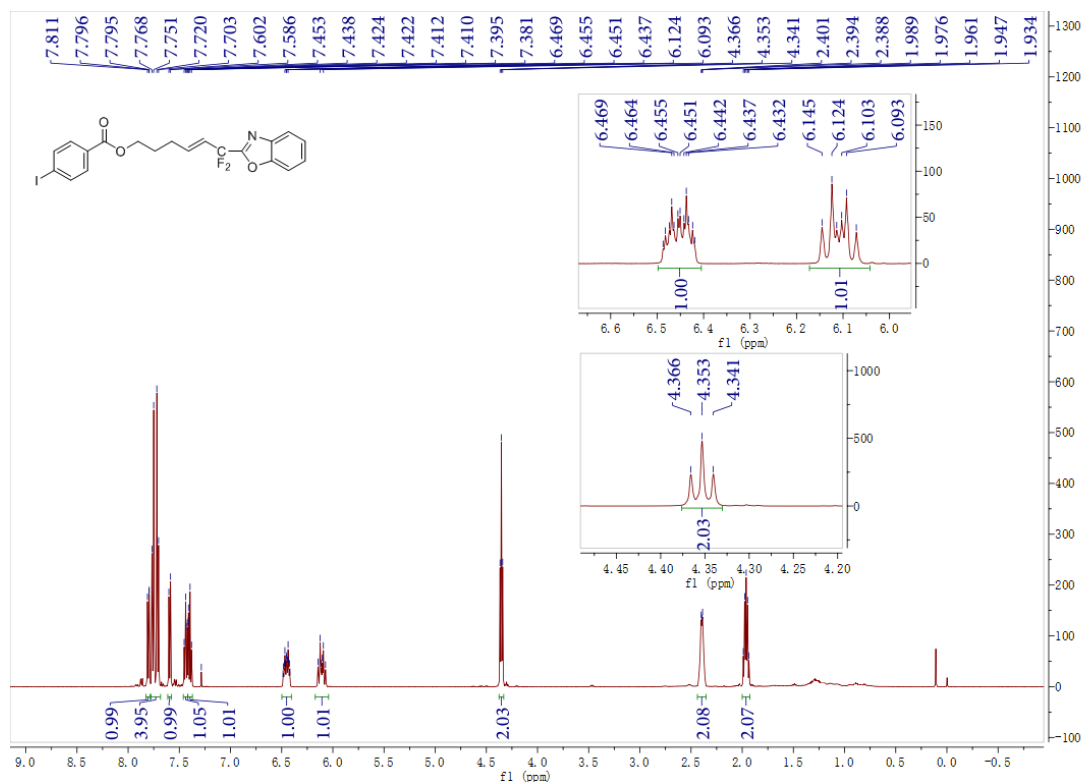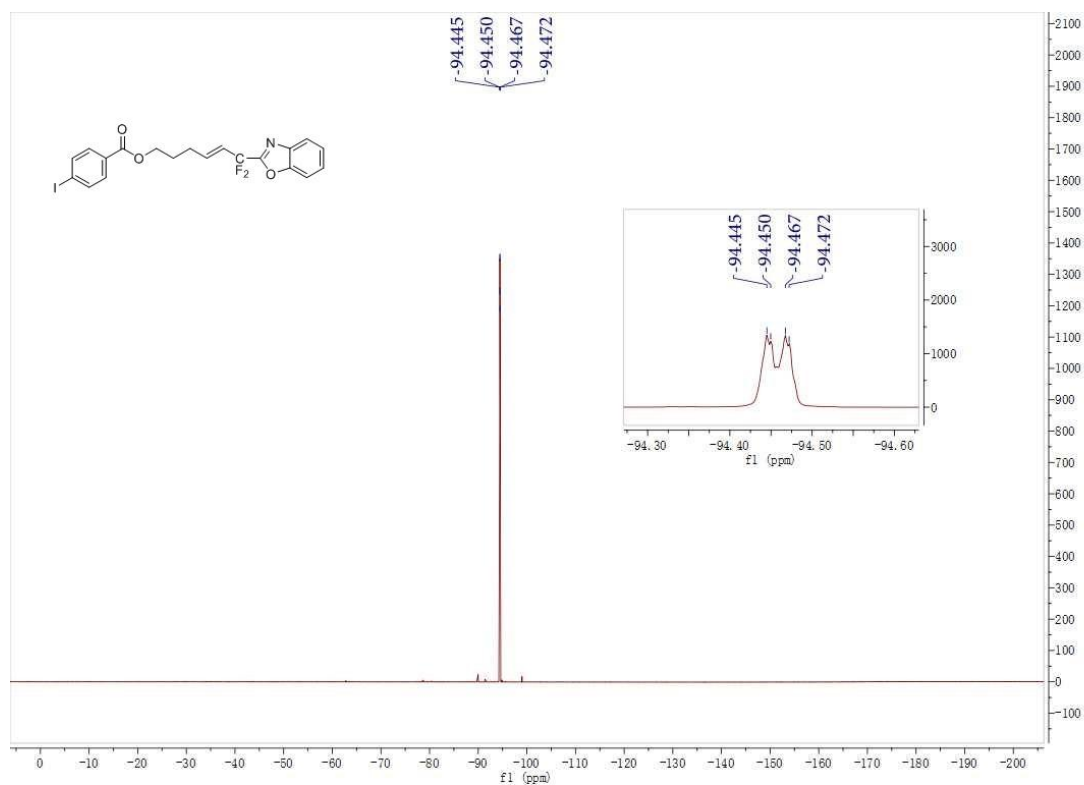

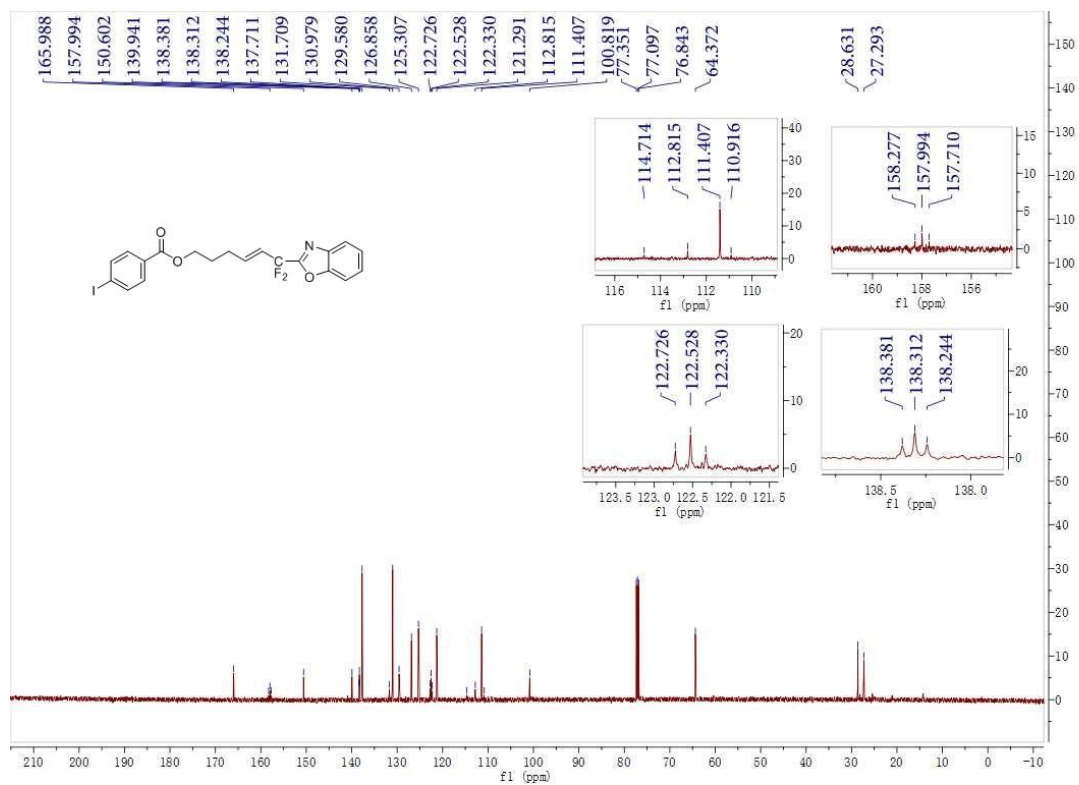

### 2-(benzo[d]oxazol-2-yl)-3-methylbut-2-en-1-yl 4-bromobenzoate (3s)

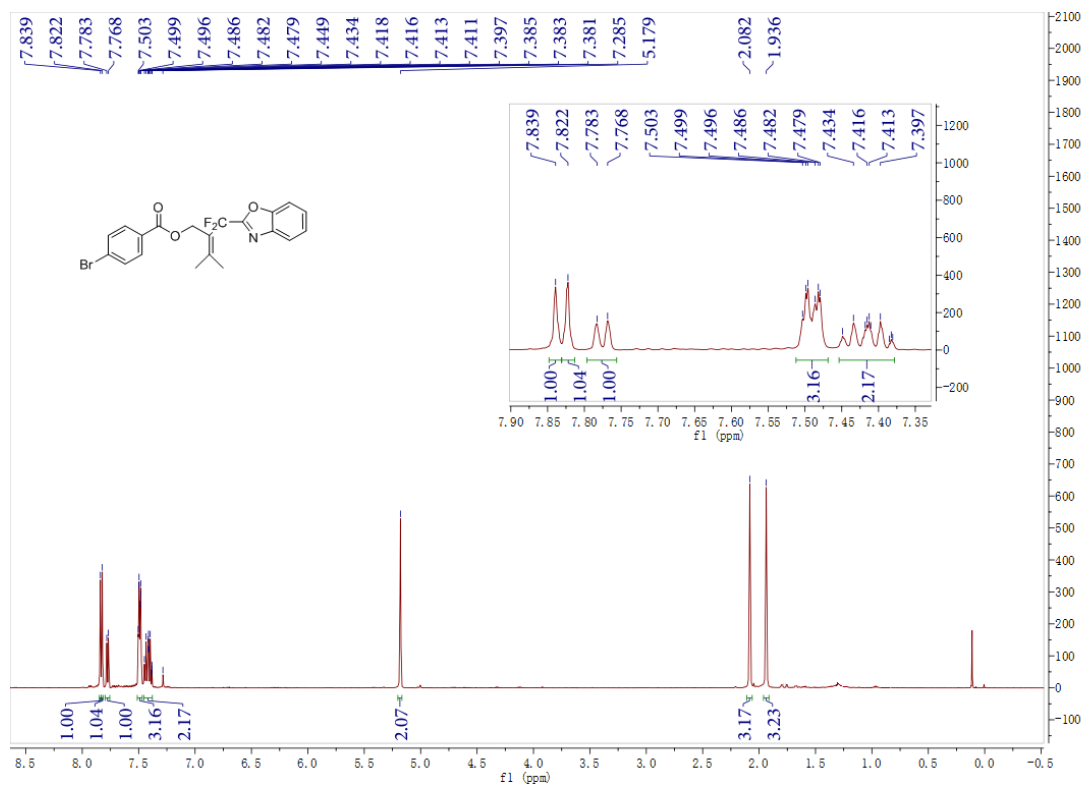

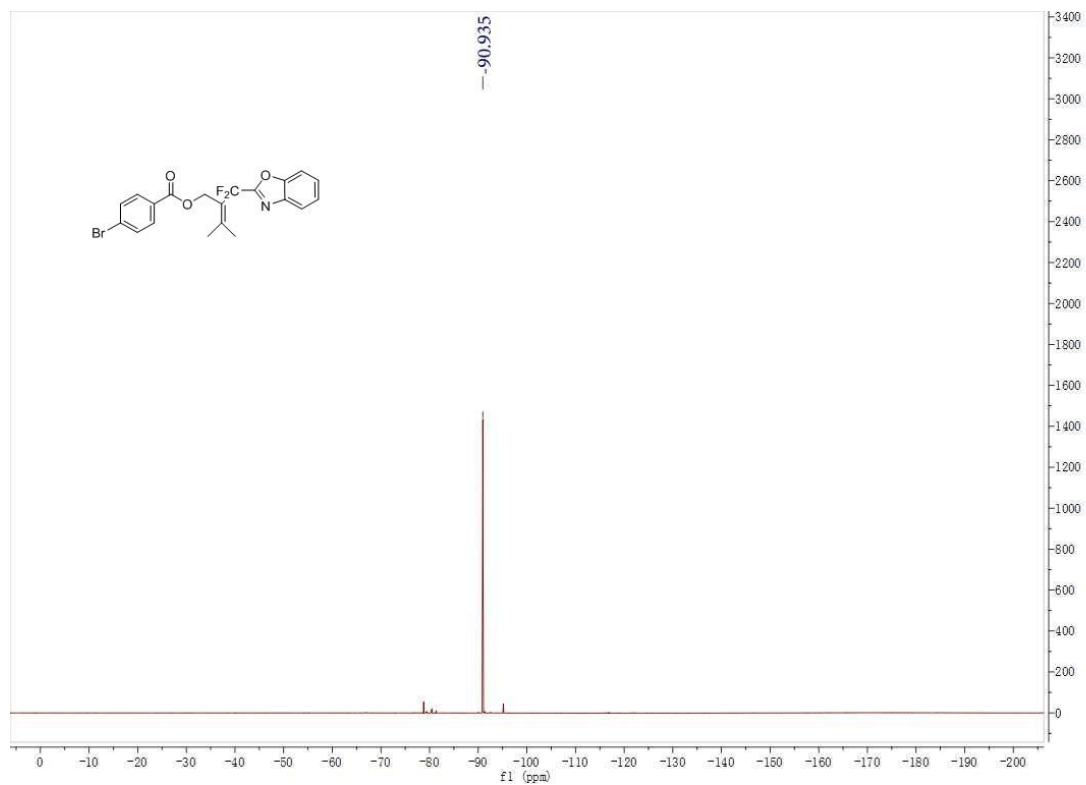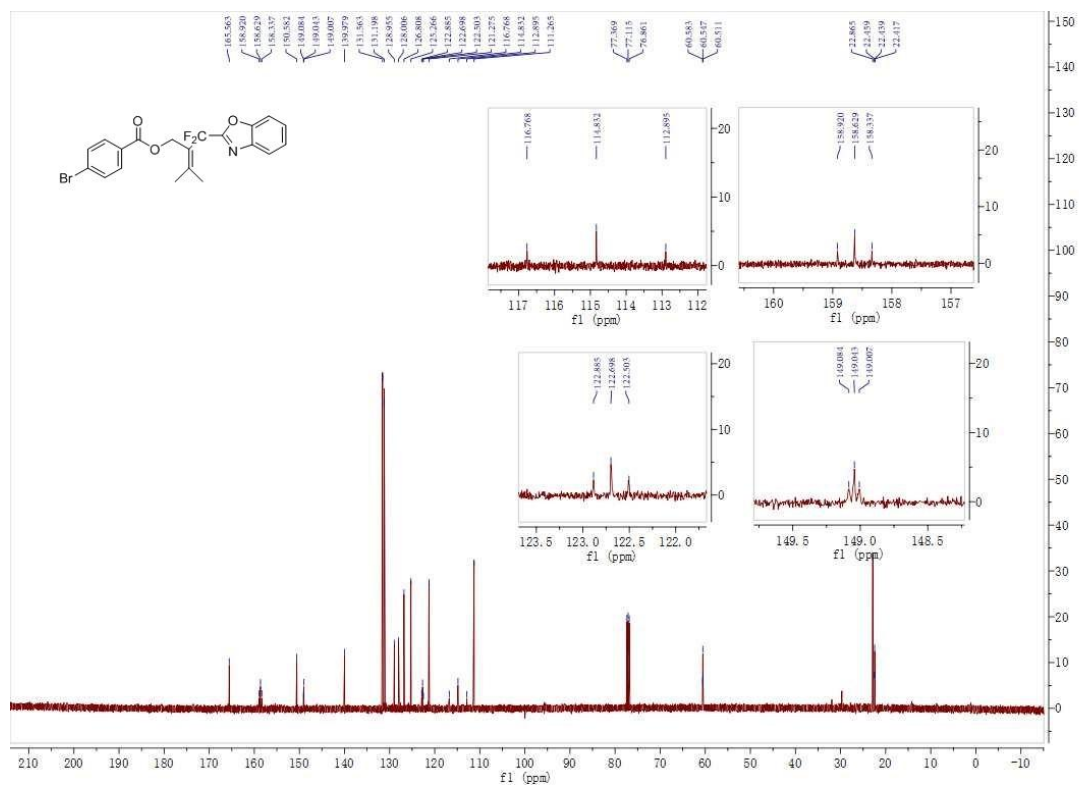

***p*-tolyl (*E*)-4-(benzo[*d*]oxazol-2-yl)-4,4-difluoro-2-methylbut-2-enoate (3t)**

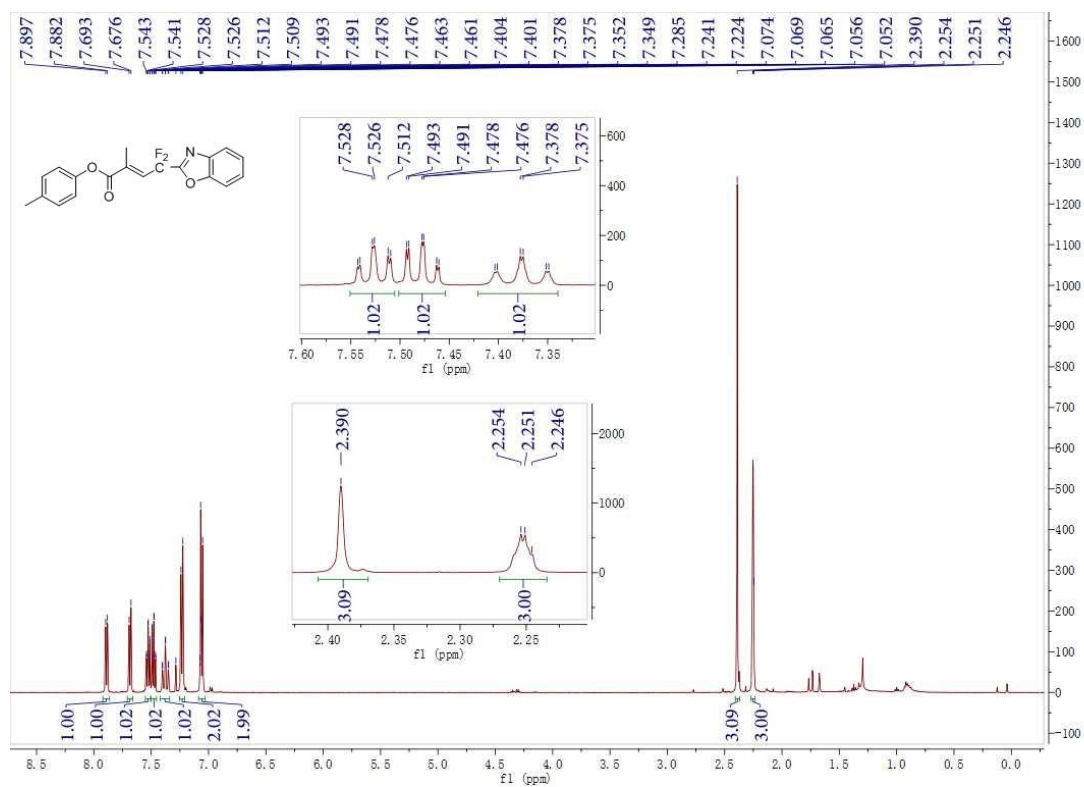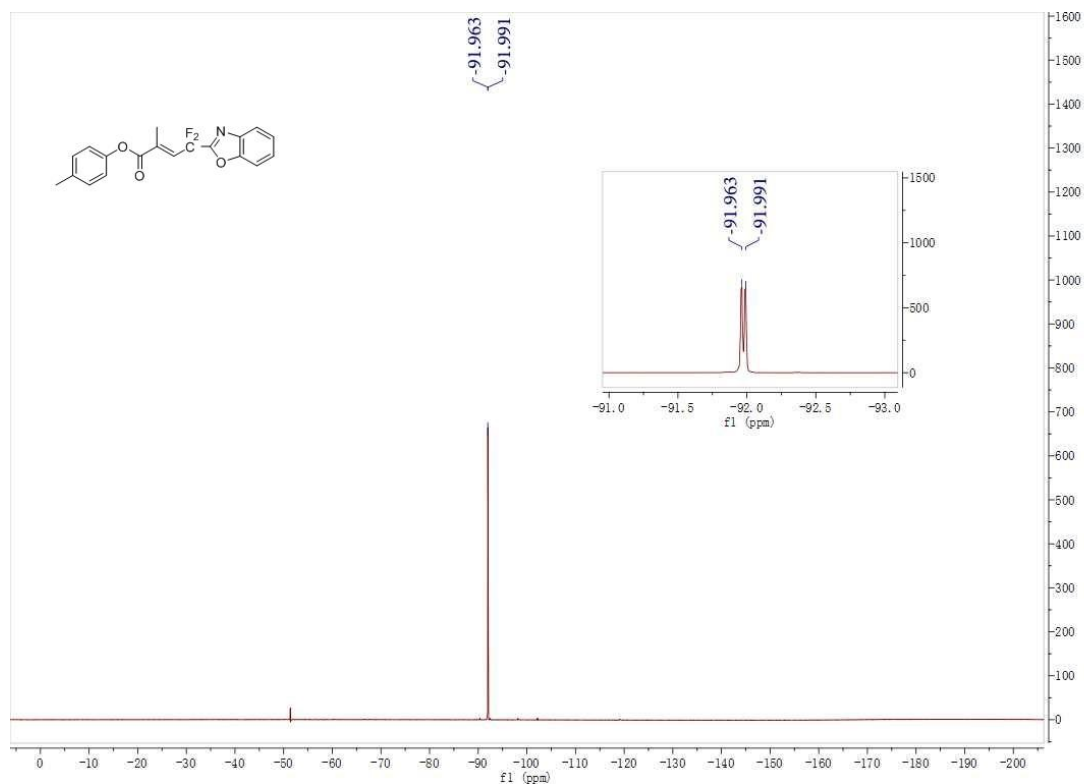



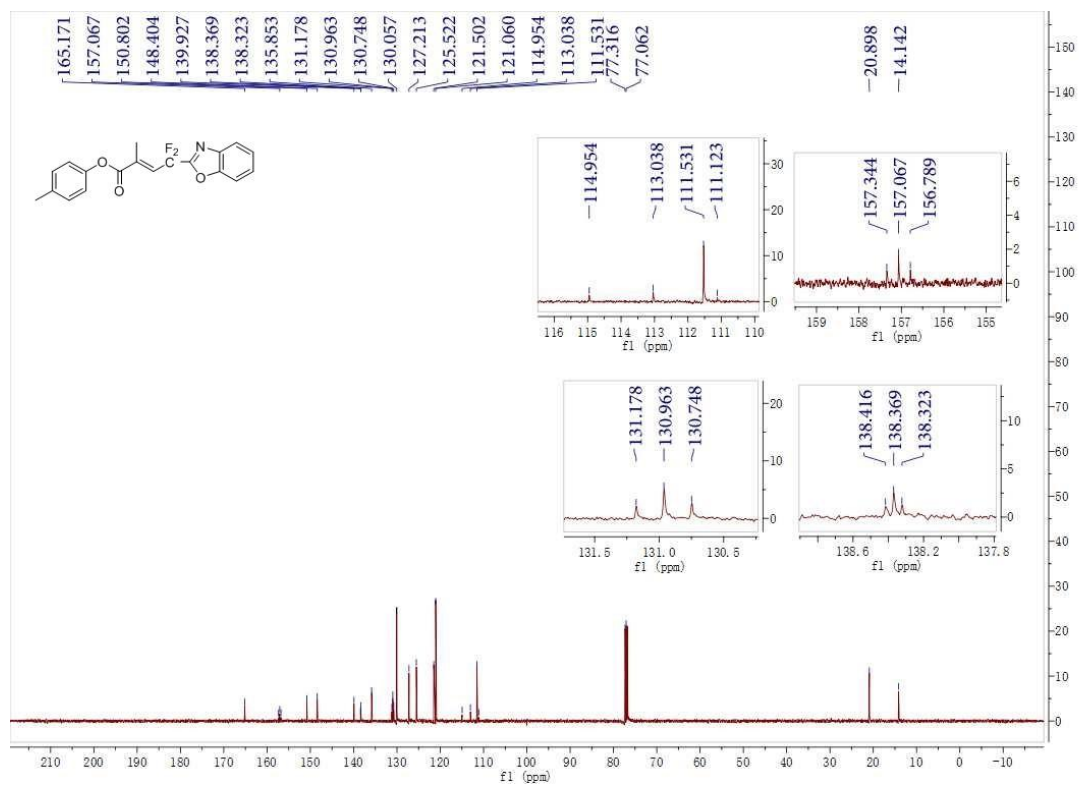

**3-(2-(benzo[d]oxazol-2-yl)-2,2-difluoroethyl)-1,3-dimethylindolin-2-one (4u)**

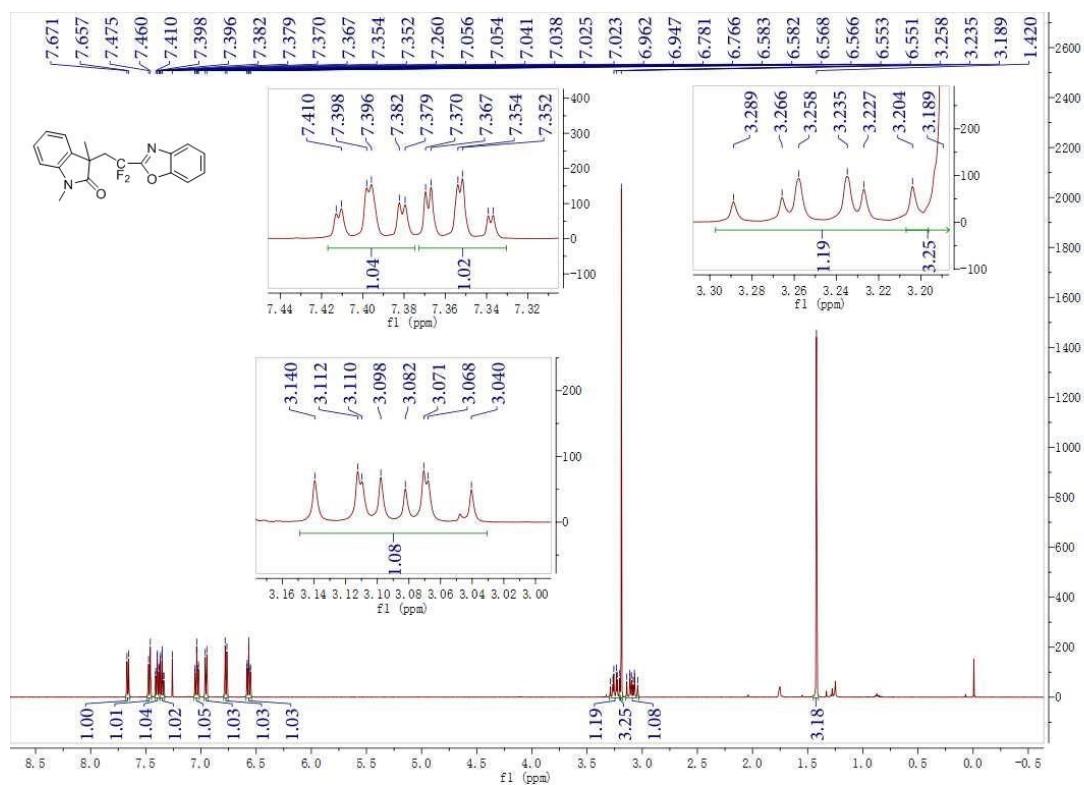



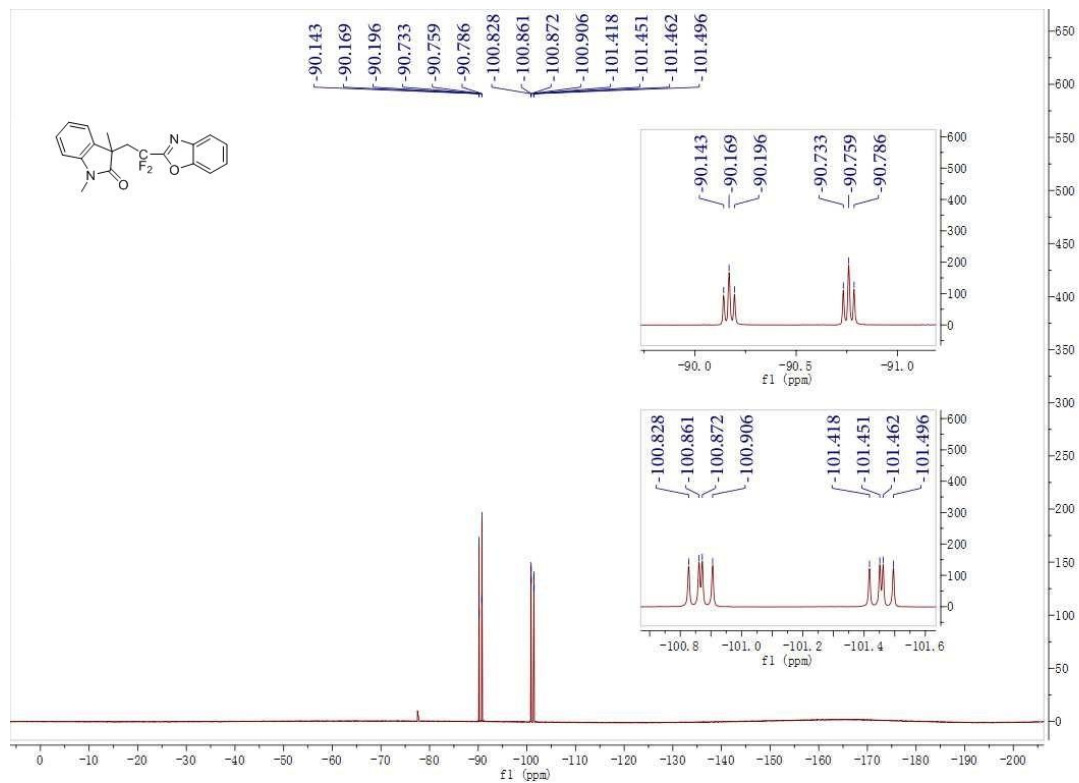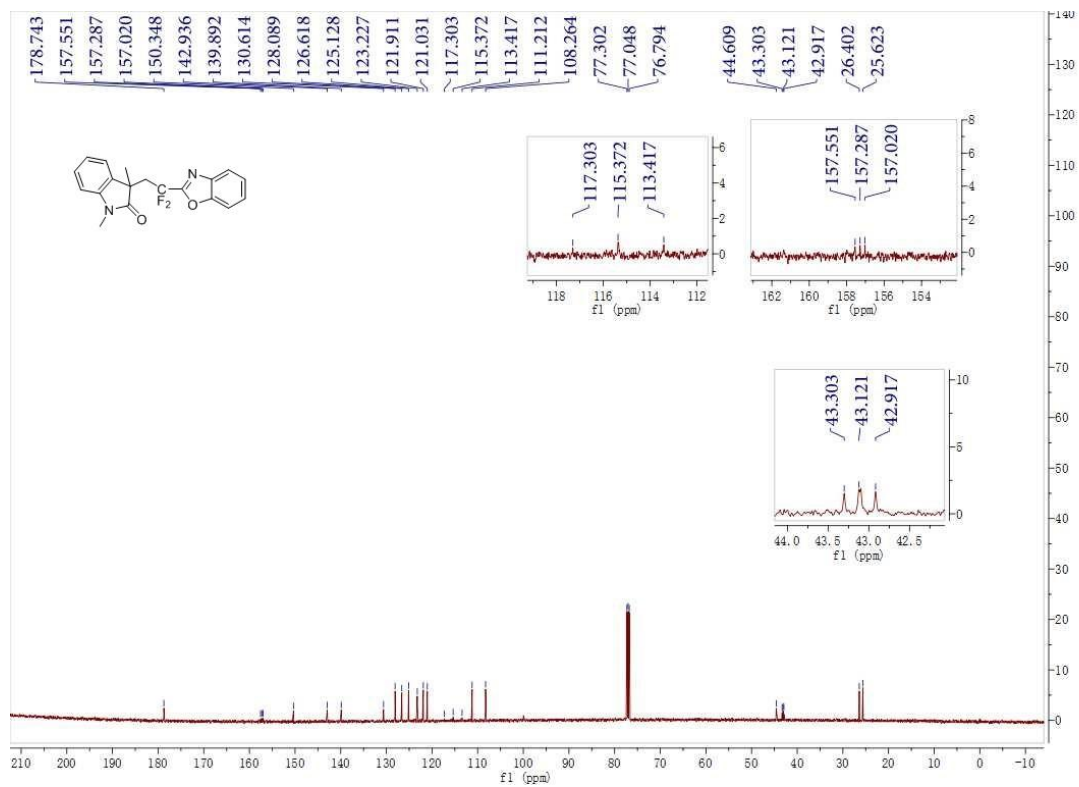

## 2-(benzofuran-3-yl)difluoromethyl)benzo[d]oxazole (3v)

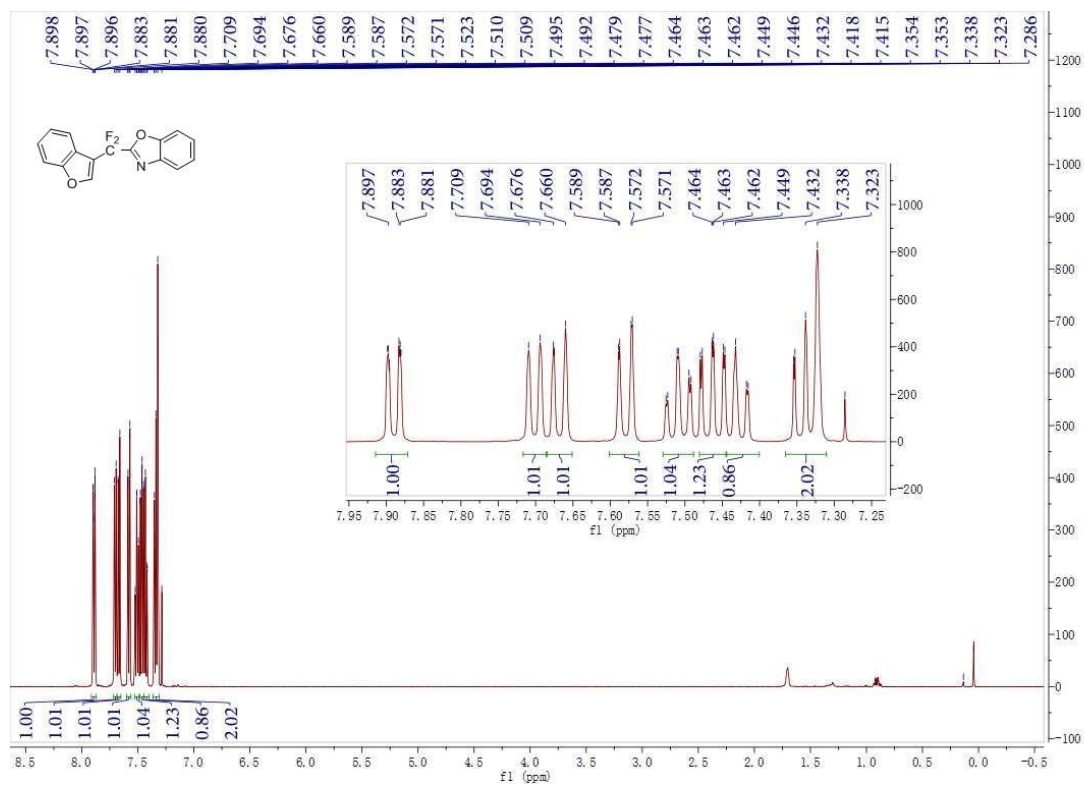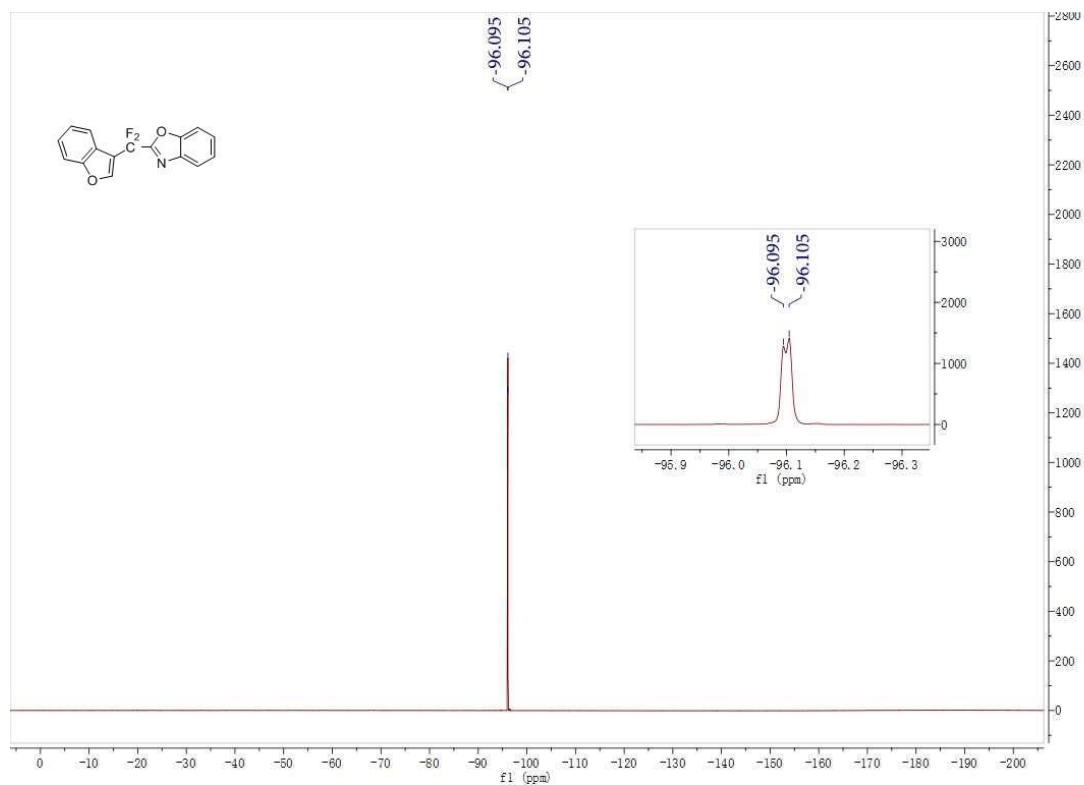

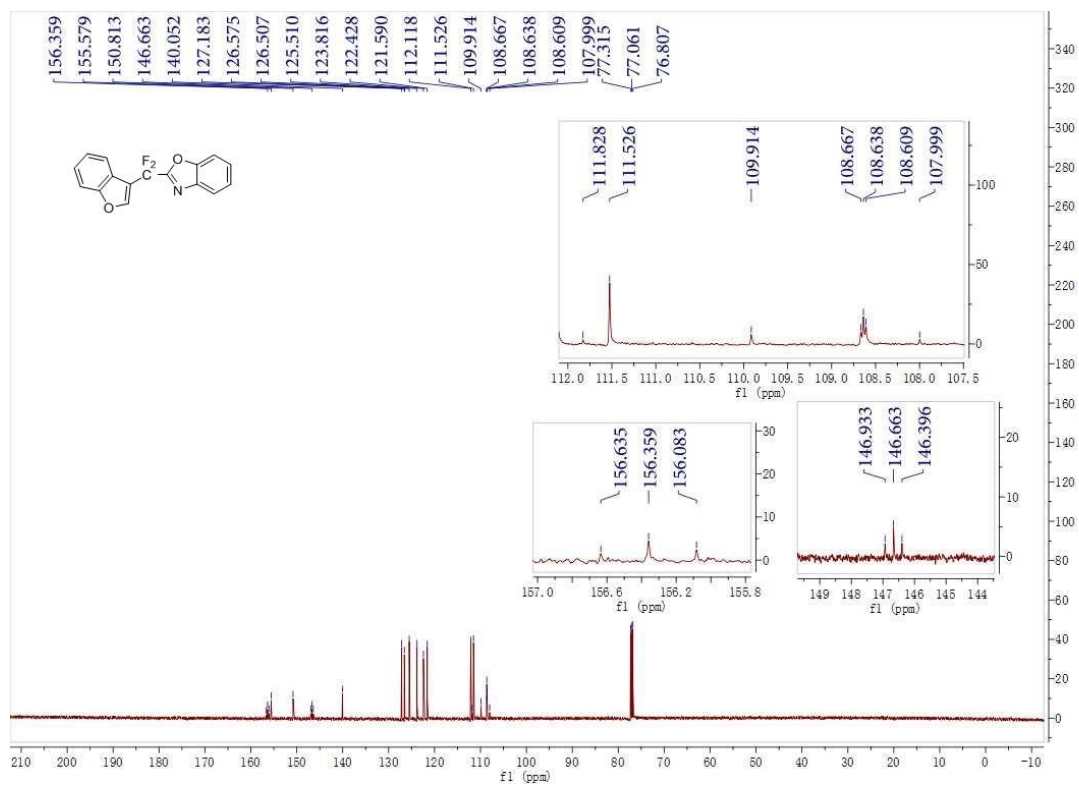

**(E)-2-(1,1-difluoro-3-phenylallyl)-5-methylbenzo[d]oxazole (3w)**

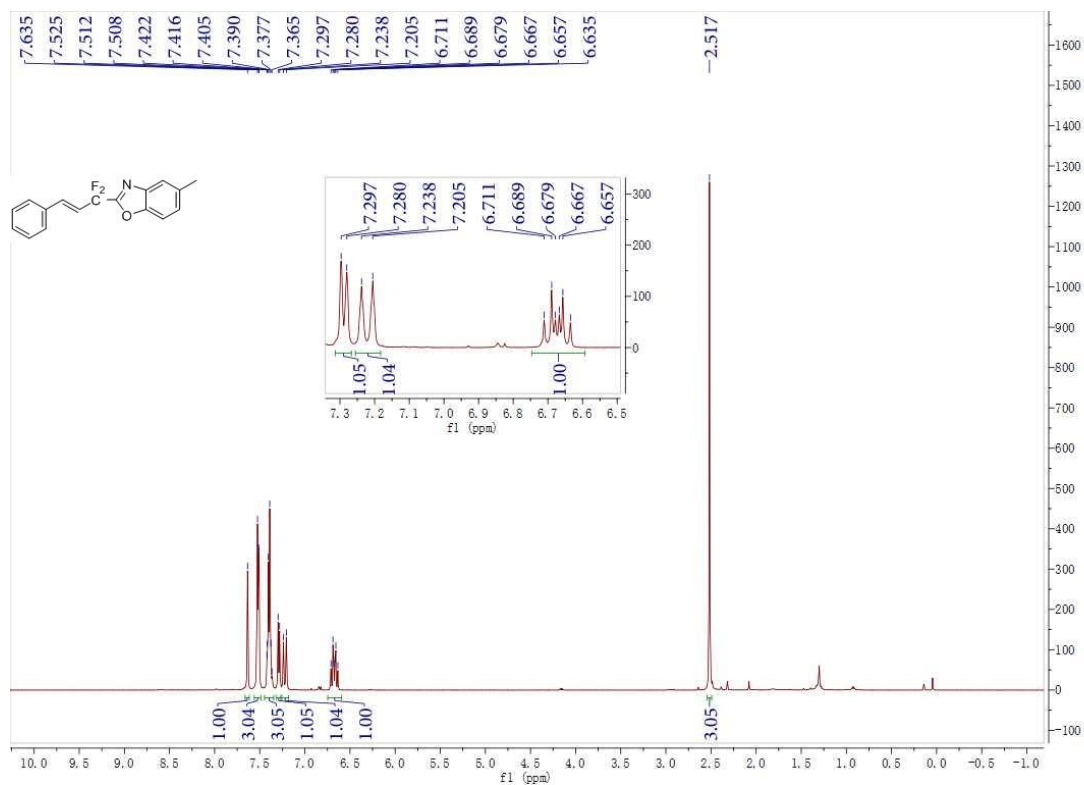

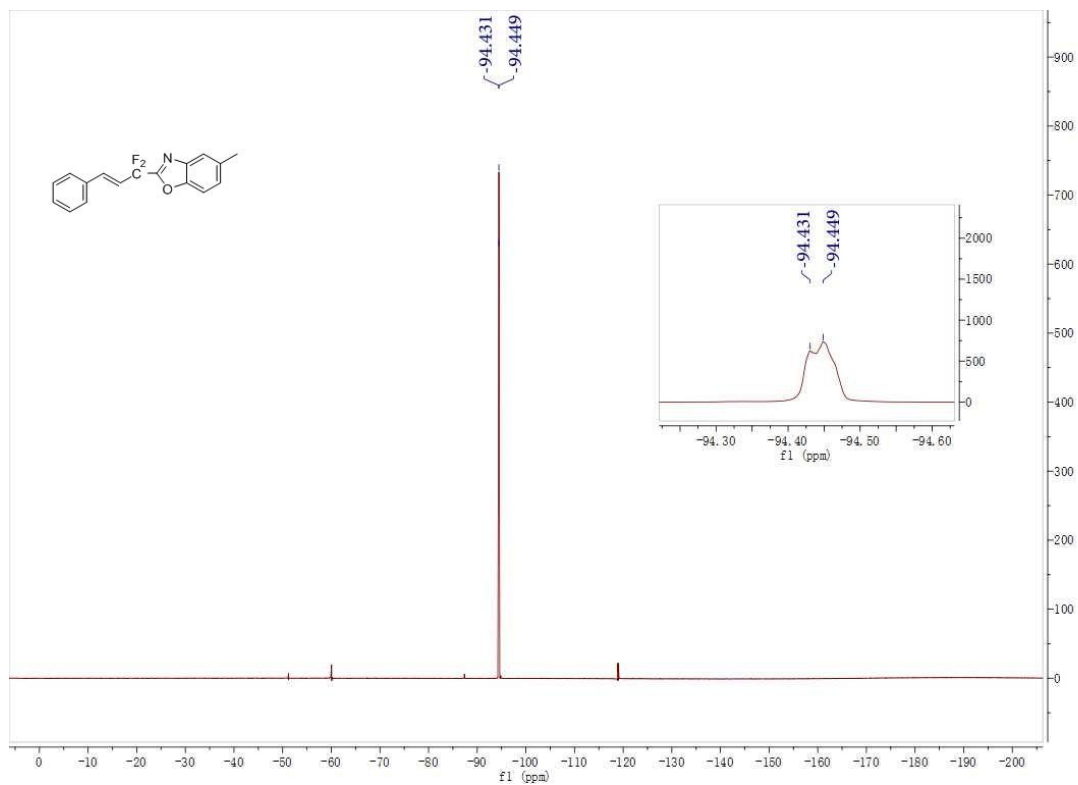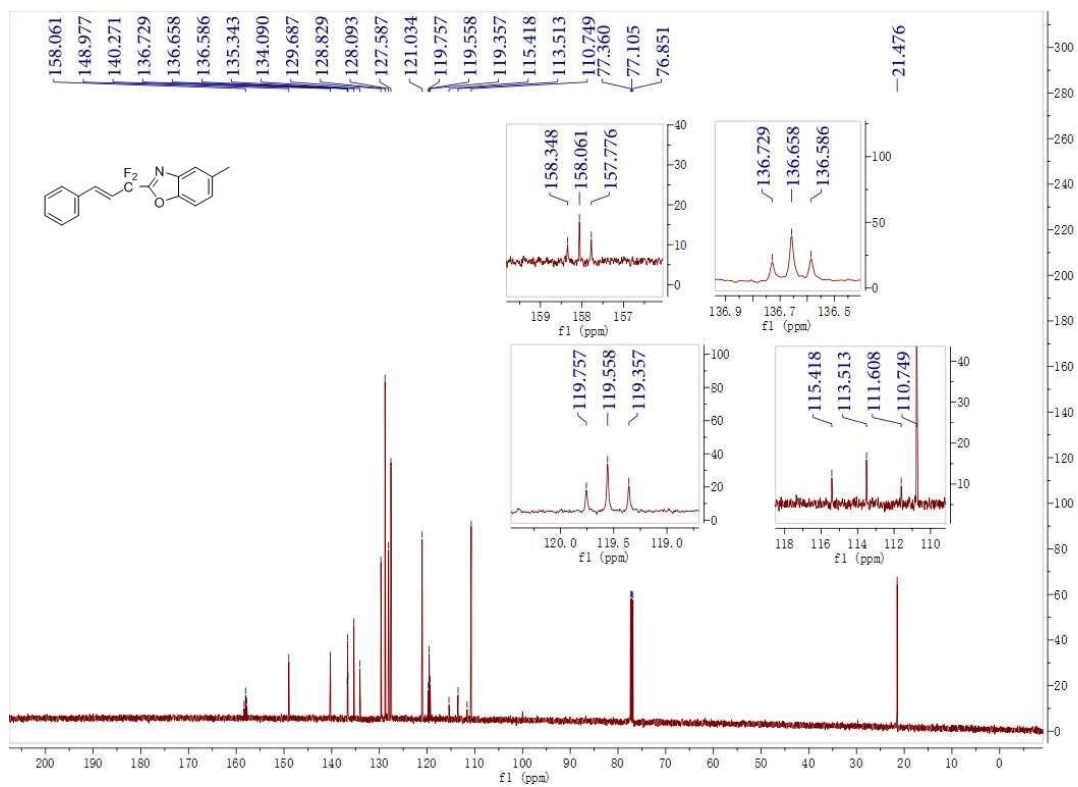

**(E)-2-(1,1-difluoro-3-phenylallyl)benzo[d]thiazole (3x)**

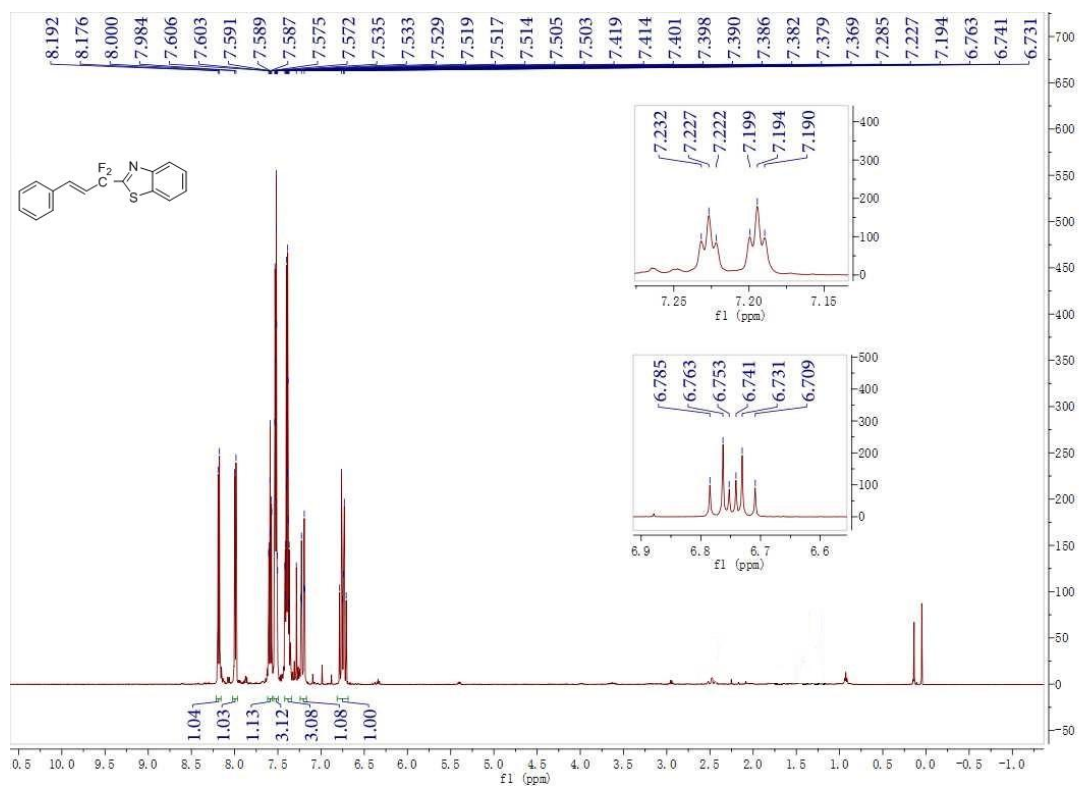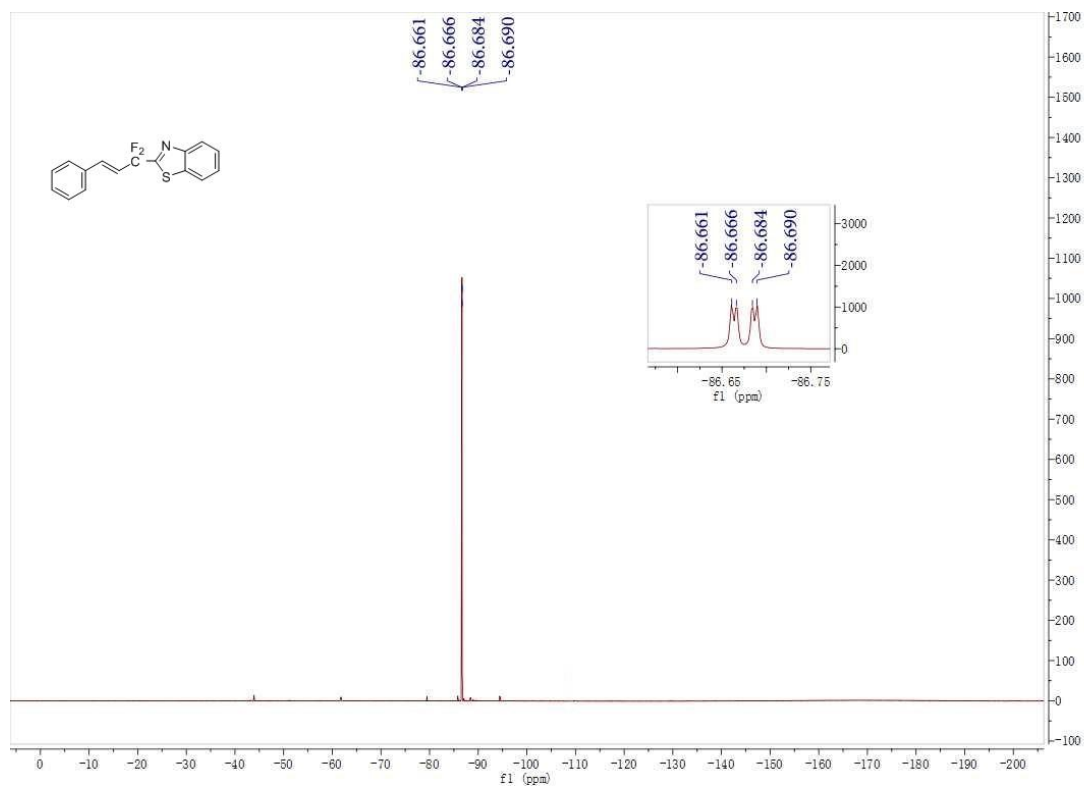

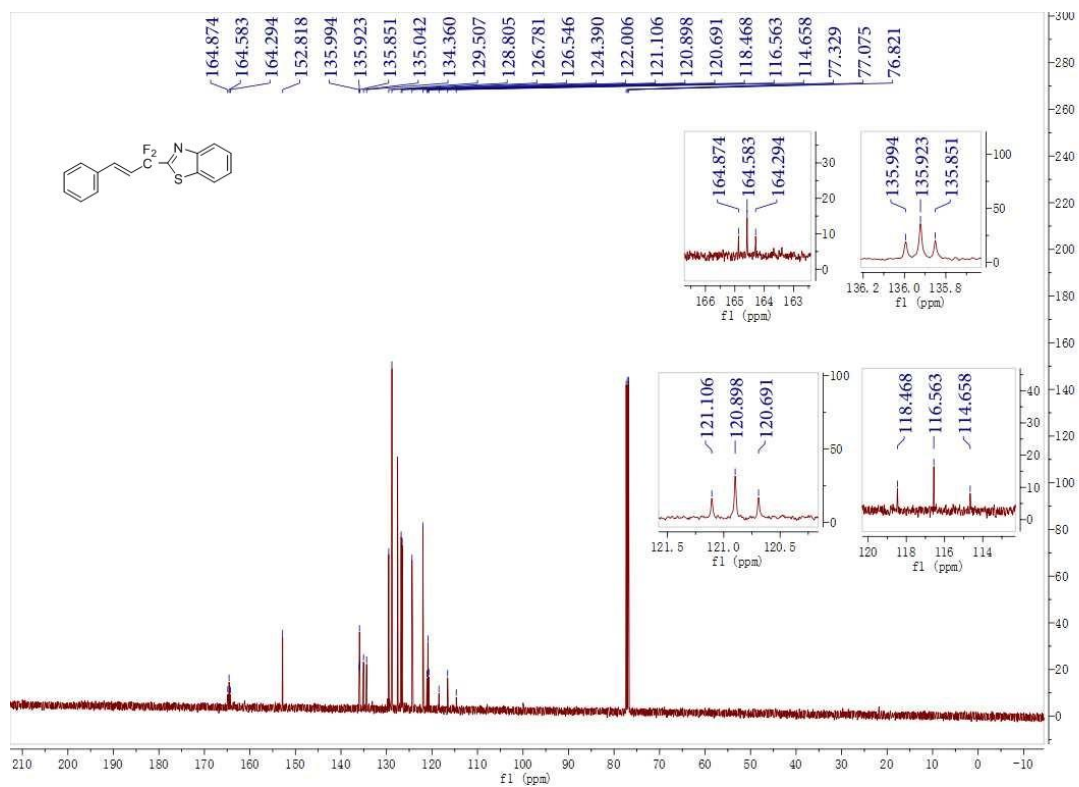

**(E)-2-(1,1-difluoroundec-2-en-1-yl)-5-methylbenzo[d]oxazole (3y)**

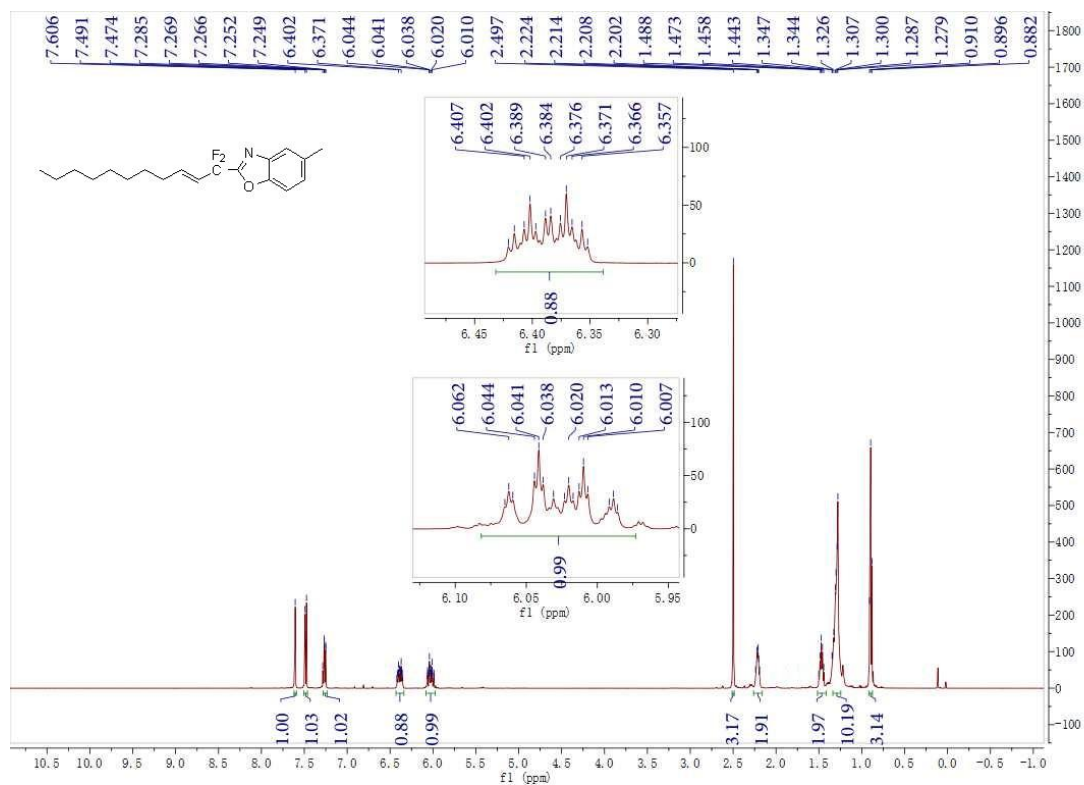



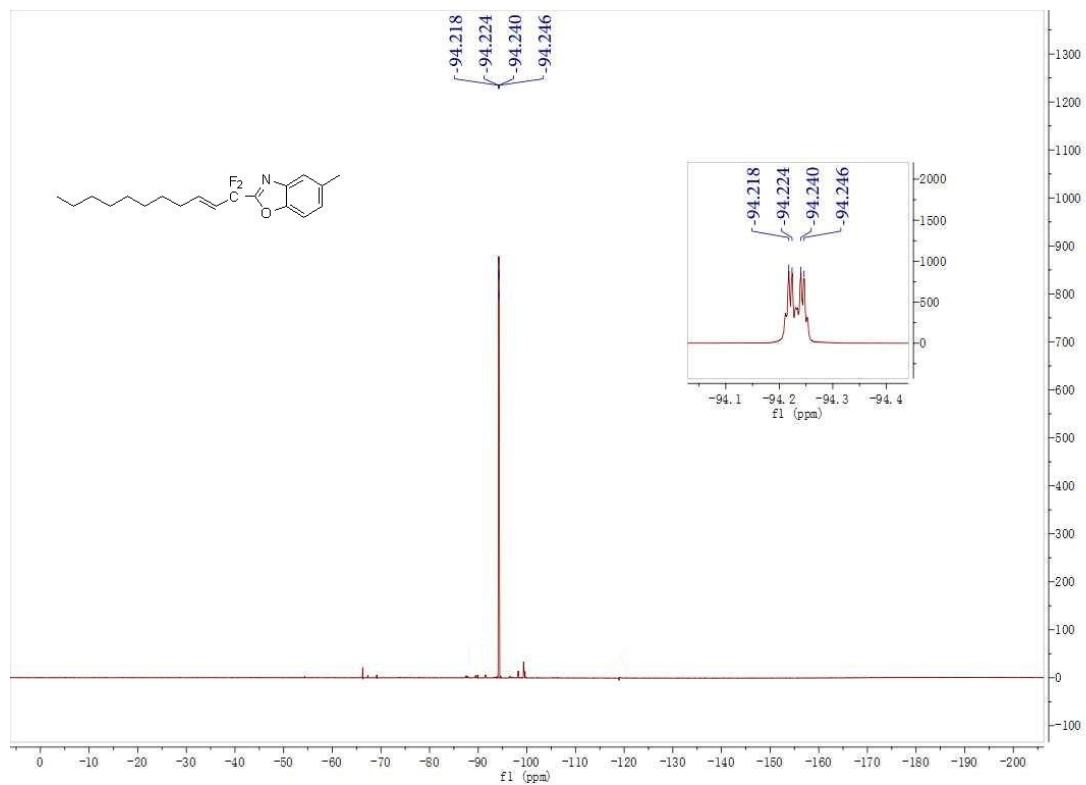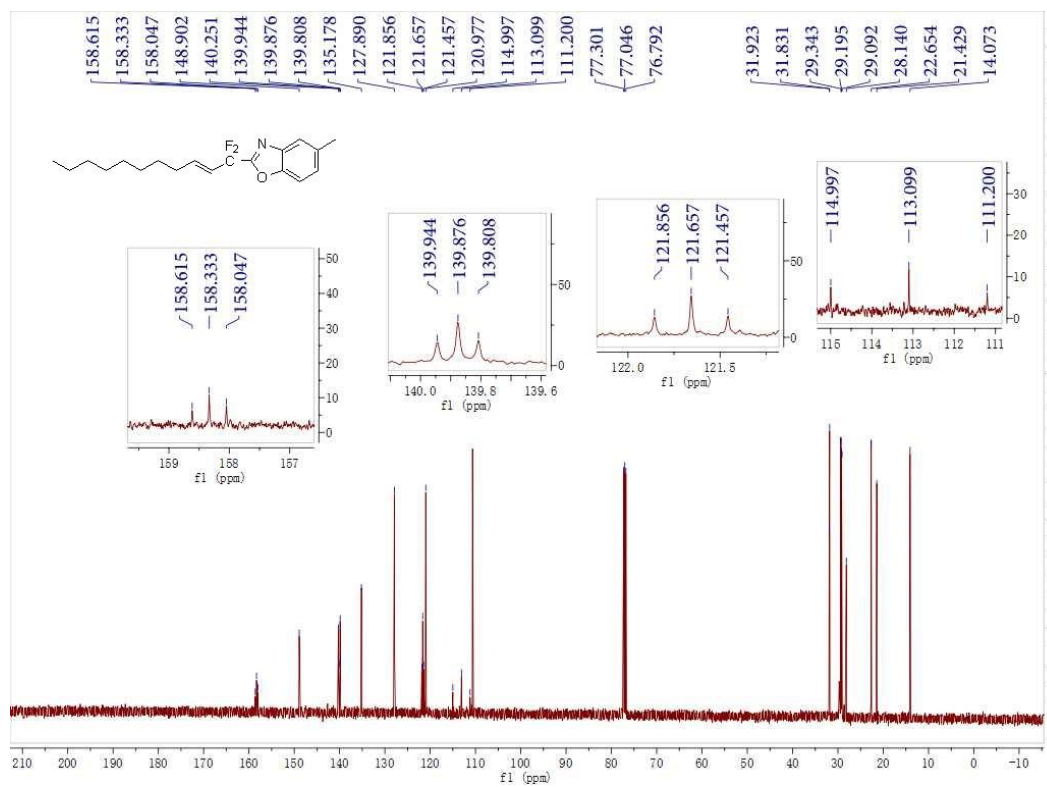

Supplement: c7qo00119c1.pdf [file c7qo00119c1.pdf]
